# Supplementary material
Source: PubMed Central journal article supplement (PMC5734036)
Supplement: AEM.01868-17_zam001188211s1.pdf [file AEM.01868-17_zam001188211s1.pdf]

Supplementary data S1: Multiple sequence alignments of the selected marker genes

Alignment: /Users/Peter/Dropbox/\_UvA/Shared\_Martijn\_Peter/03.f.sp.markers/figures/markers\_aligned\_150bp/nicename/001..94\_hypothetical\_pr  
 Seaview [blocks=100 fontsize=7 A4] on Fri Mar 10 14:21:05 2017

1  
 Fotul\_Tu67\_1 CGTCCTTCTTCTCTCACAATAAC-----TATATGAG-AC-----TACTTTA-TCAAACCTCTCCTACATATT----TACAAC-CATATAAATCT  
 Fomag\_002\_2 CGTCCTTCTTCTCTCACAATAAC-----CATATGAG-AC-----TACTTTA-TCAAACCTCTCCGACATATT----TACGAC-TATATAAATCT  
 Focuc\_037\_1 CGTCCTTCTTCTCTCACAATAAC-----TATATGAG-AC-----TACTTTA-TCAAACCTCTCCTCCGTATT----TACAAC-TATATAAATCT  
 Fomln\_012\_1 CGTCCTTCTTCTCTCACAATAAC-----TATATGAG-AC-----TACTTTA-TCAAACCTCTCCTCCGTATT----TACAAC-TATATAAATCT  
 Foluf\_001\_3 CGTCCTTCTTCTCTCACAATAAC-----TATATGAG-AC-----TACTTTA-TCAAACCTCTCCTCCGTATT----TACAAC-TATATAAATCT  
 Fomln\_013\_2 CGTCCTTCTTCTCTCACAATAAC-----TATATGAG-AC-----TACTTTA-TCAAACCTCTCCTCCGTATT----TACAAC-TATATAAATCT  
 Fomln\_001\_2 CGTCCTTCTTCTCTCACAATAAC-----TATATGAG-AC-----TACTTTA-TCAAACCTCTCCTCCGTATT----TACAAC-TATATAAATCT  
 Fomln\_004\_2 CGTCCTTCTTCTCTCACAATAAC-----TATATGAG-AC-----TACTTTA-TCAAACCTCTCCTCCGTATT----TACAAC-TATATAAATCT  
 Fomln\_005\_2 CGTCCTTCTTCTCTCACAATAAC-----TATATGAG-AC-----TACTTTA-TCAAACCTCTCCTCCGTATT----TACAAC-TATATAAATCT  
 Fomln\_006\_2 CGTCCTTCTTCTCTCACAATAAC-----TATATGAG-AC-----TACTTTA-TCAAACCTCTCCTCCGTATT----TACAAC-TATATAAATCT  
 Fomln\_016\_2 -GTCCCTTCTTCTCTCACAATAAC-----TATATGAG-AC-----TACTTTA-TCAAACCTCTCCTCCGTATT----TACAAC-TATATAAATCT  
 Forcu\_016\_2 -GTCCCTTCTTCTCTCACAATAAC-----TATATGAG-AC-----TACTTTA-TCAAACCTCTCCTCCGTATT----TACAAC-TATATAAATCT  
 Forcu\_024\_2 -GTCCCTTCTTCTCTCACAATAAC-----TATATGAG-AC-----TACTTTA-TCAAACCTCTCCTCCGTATT----TACAAC-TATATAAATCT  
 Forcu\_031\_1 -GTCCCTTCTTCTCTCACAATAAC-----TATATGAG-AC-----TACTTTA-TCAAACCTCTCCTCCGTATT----TACAAC-TATATAAATCT  
 Foluf\_001\_2 ATACATAAATCCTCTCGTAAACAC-----TGTATTAA-AC-----TTTTTTA-TTAAAATCTTCTATGTAAT--TATAAC-TA--AAATCC  
 Foluf\_002\_2 ATACATAAATCCTCTCGTAAACAC-----TGTATTAA-AC-----TTTTTTA-TTAAAATCTTCTATGTAAT--TATAAC-TA--AAATCC  
 Foluf\_001\_1 -----AAGTAGATGT-----CACATTGA-AC-----TGCCTTATTATTGCTTCTATTATATACT--TACGAC-TATATTAGTCCG  
 Foluf\_002\_1 -----AGTAGATGT-----CACATTGA-AC-----TGCCTTATTATTGCTTCTATTATATACT--TACGAC-TATATTAGTCCG  
 Fomln\_009 ATTAGTGGGGTCTCAGGTAGGTTAGCTAAGTCCGGCCGGGAATTCGCCAGGCTTTCACTAAAAGTAAAGTAAAGTGAACGCAAC--TGTTGCTC-  
 Fomln\_011 ATTAGTGGGGTCTCAGGTAGGTTAGCTAAGTCCGGCCGGGAATTCGCCAGGCTTTCACTAAAAGTAAAGTAAAGTGAACGCAAC-TGT-----  
 Fopis\_HDV247\_0 ----CGGCTTCCGACATCGAGAAGG-----ACTCGGA-GC-----GGCGATGGGTCTCGAGATTGTGCAT--TGAAA--GGAACAGGCC  
 Fopis\_HDV247\_1 -TACATTCAACCAACCCCTAGTATAT-----CATGTGTA-GCAGCAAGTTCAGTCTAAAATAATTTGTCAAAGTATA--AAGAGCTTACACTAAGTG  
 Fopis\_HDV247\_2 -TACATTCAACCAACCCCTAGTATAT-----CATGTGTA-GCAGCAAGTTCAGTCTAAAATAATTTGTCAAAGTATA--AAGAGCTTACACTAAGTG  
 Fotul\_Tu67\_0 -----ATCCACT-----TG--G--CCTATTGGTCT  
 Forap\_PHW815 -----TTCTCTTCAAGGAAACAC-----CACATTGA-AC-----TACCGGACTTTTATTAAATCTCCCTTACATACT--TGCAGC-TATATTAGTCC  
 Forcu\_016\_1 CTTTCTTCTCCACAAGTAAACAC-----CACATTGA-AC-----TGCTTTACTTCTACTTCTCTTATATATT--TGCAGC-TATATTAGACC  
 Fomln\_016\_1 CTTTCTTCTCCACAAGTAAACAC-----CACATTGA-AC-----TGCTTTACTTCTACTTCTCTTATATATT--TGCAGC-TATATTAGACC  
 Fomln\_006\_1 CTTTCTTCTCCACAAGTAAACAC-----CACATTGA-AC-----TGCTTTACTTCTACTTCTCTTATATATT--TGCAGC-TATATTAGACC  
 Fomln\_001\_1 -TTTCTTCTCCACAAGTAAACAC-----CACATTGA-AC-----TGCTTTACTTCTACTTCTCTTATATATT--TGCAGC-TATATTAGACC  
 Fomln\_004\_1 -TTTCTTCTCCACAAGTAAACAC-----CACATTGA-AC-----TGCTTTACTTCTACTTCTCTTATATATT--TGCAGC-TATATTAGACC  
 Fomln\_005\_1 -TTTCTTCTCCACAAGTAAACAC-----CACATTGA-AC-----TGCTTTACTTCTACTTCTCTTATATATT--TGCAGC-TATATTAGACC  
 Fomln\_013\_1 -TTTCTTCTCCACAAGTAAACAC-----CACATTGA-AC-----TGCTTTACTTCTACTTCTCTTATATATT--TGCAGC-TATATTAGACC  
 Forcu\_024\_1 -TTTCTTCTCCACAAGTAAACAC-----CACATTGA-AC-----TGCTTTACTTCTACTTCTCTTATATATT--TGCAGC-TATATTAGACC  
 Foniv\_005 -TTTCTTCTCCACAAGTAAACAC-----CACATTGA-AC-----TGCTTTACTTCTACTTCTCTTATATATT--TGCAGC-TATATTAGACC  
 Foniv\_010 CTTTCTTCTCCACAAGTAAACAC-----CACATTGA-AC-----TGCTTTACTTCTACTTCTCTTATATATT--TGCAGC-TATATTAGACC  
 Foniv\_020 CTTTCTTCTCCACAAGTAAACAC-----CACATTGA-AC-----TGCTTTACTTCTACTTCTCTTATATATT--TGCAGC-TATATTAGACC  
 Foluf\_002\_0 CTTTCTTCTCCACAAGTAAACAC-----CACATTGA-AC-----TGCTTTACTTCTACTTCTCTTATATATT--TGCAGC-TATATTAGACC  
 Fomom\_001 CTTTCTTCTCCACAAGTAAACAC-----CACATTGA-AC-----TGCTTTACTTCTACTTCTCTTATATATT--TGCAGC-TATATTAGACC  
 Foluf\_001\_0 -TTTCTTCTCCACAAGTAAACAC-----CACATTGA-AC-----TGCTTTACTTCTACTTCTCTTATATATT--TGCAGC-TATATTAGACC  
 Fomom\_004 -TTTCTTCTCCACAAGTAAACAC-----CACATTGA-AC-----TGCTTTACTTCTACTTCTCTTATATATT--TGCAGC-TATATTAGACC  
 Fomag\_002\_1 CTTTCTTCTCCACAAGTAAACAC-----CACATTGA-AC-----TGCTTTACTTCTACTTCTCTTATATATT--TGCAGC-TATATTAGACC  
 Foniv\_015 CTTTCTTCTCCACAAGTAAACAC-----CACATTGA-AC-----TGCTTTACTTCTACTTCTCTTATATATT--TGCAGC-TATATTAGACC  
 Foniv\_021 CTTTCTTCTCCACAAGTAAACAC-----CACATTGA-AC-----TGCTTTACTTCTACTTCTCTTATATATT--TGCAGC-TATATTAGACC  
 Foniv\_037 CTTTCTTCTCCACAAGTAAACAC-----CACATTGA-AC-----TGCTTTACTTCTACTTCTCTTATATATT--TGCAGC-TATATTAGACC  
 Focuc\_011 -TTTCTTCTCCACAAGTAAACAC-----CACATTGA-AC-----TGCTTTACTTCTACTTCTCTTATATATT--TGCAGC-TATATTAGACC  
 Focuc\_035 -TTTCTTCTCCACAAGTAAACAC-----CACATTGA-AC-----TGCTTTACTTCTACTTCTCTTATATATT--TGCAGC-TATATTAGACC  
 Focuc\_037\_0 -TTTCTTCTCCACAAGTAAACAC-----CACATTGA-AC-----TGCTTTACTTCTACTTCTCTTATATATT--TGCAGC-TATATTAGACC  
 Focuc\_001 CTTTCTTCTCCACAAGTAAACAC-----CACATTGA-AC-----TGCTTTACTTCTACTTCTCTTATATATT--TGCAGC-TATATTAGACC  
 Focuc\_013 CTTTCTTCTCCACAAGTAAACAC-----CACATTGA-AC-----TGCTTTACTTCTACTTCTCTTATATATT--TGCAGC-TATATTAGACC  
 Focuc\_015 CTTTCTTCTCCACAAGTAAACAC-----CACATTGA-AC-----TGCTTTACTTCTACTTCTCTTATATATT--TGCAGC-TATATTAGACC  
 Fomag\_001 -TTTCTTCTCCACAAGTAAACAC-----CACATTGA-AC-----TGCTTTACTTCTACTTCTCTTATATATT--TGCAGC-TATATTAGACC  
 Fomag\_005\_1 -TTTCTTCTCCACAAGTAAACAC-----CACATTGA-AC-----TGCTTTACTTCTACTTCTCTTATATATT--TGCAGC-TATATTAGACC  
 Foniv\_002 -TTTCTTCTCCACAAGTAAACAC-----CACATTGA-AC-----TGCTTTACTTCTACTTCTCTTATATATT--TGCAGC-TATATTAGACC  
 Foniv\_013 -TTTCTTCTCCACAAGTAAACAC-----CACATTGA-AC-----TGCTTTACTTCTACTTCTCTTATATATT--TGCAGC-TATATTAGACC  
 Foniv\_019 -TTTCTTCTCCACAAGTAAACAC-----CACATTGA-AC-----TGCTTTACTTCTACTTCTCTTATATATT--TGCAGC-TATATTAGACC  
 Focuc\_018 -TTTCTTCTCCACAAGTAAACAC-----CACATTGA-AC-----TGCTTTACTTCTACTTCTCTTATATATT--TGCAGC-TATATTAGACC  
 Focuc\_021 -TTTCTTCTCCACAAGTAAACAC-----CACATTGA-AC-----TGCTTTACTTCTACTTCTCTTATATATT--TGCAGC-TATATTAGACC  
 Focuc\_030 CTTTCTTCTCCACAAGTAAACAC-----CACATTGA-AC-----TGCTTTACTTCTACTTCTCTTATATATT--TGCAGC-TATATTAGACC  
 Fomag\_002\_0 --AACACGGCCGGTACATAAAACAC--AGCCGGCACATAAAACAC--AGCCGGCACATAAAAC--ACATACT--TGCAAC-TATATTAGTCC  
 Fomag\_004 --AACACGGCCGGTACATAAAACAC--AGCCGGCACATAAAACAC--AGCCGGCACATAAAAC--ACATACT--TGCAAC-TATATTAGTCC  
 Fomag\_005\_0 --AACACGGCCGGTACATAAAACAC--AGCCGGCACATAAAACAC--AGCCGGCACATAAAAC--ACATACT--TGCAAC-TATATTAGTCC  
 Forcu\_031\_0 -----GCCGGCACATAAAACAT--AGCCGGCACATAAAACAC--AGCCGGCACATAAAAC--ACATACT--TGCAAC-TATATTAGTCC  
 Forcu\_024\_0 -----GCCGGCACATAAAACAT--AGCCGGCACATAAAACAC--AGCCGGCACATAAAAC--ACATACT--TGCAAC-TATATTAGTCC  
 Forcu\_016\_0 -----GCCGGCACATAAAACAT--AGCCGGCACATAAAACAC--AGCCGGCACATAAAAC--ACATACT--TGCAAC-TATATTAGTCC  
 Fomln\_016\_0 -----GCCGGCACATAAAACAT--AGCCGGCACATAAAACAC--AGCCGGCACATAAAAC--ACATACT--TGCAAC-TATATTAGTCC  
 Fomln\_005\_0 -----GCCGGCACATAAAACAT--AGCCGGCACATAAAACAC--AGCCGGCACATAAAAC--ACATACT--TGCAAC-TATATTAGTCC  
 Fomln\_001\_0 -----CCGGCACATAAAACAT--AGCCGGCACATAAAACAC--AGCCGGCACATAAAAC--ACATACT--TGCAAC-TATATTAGTCC  
 Fomln\_004\_0 -----CCGGCACATAAAACAT--AGCCGGCACATAAAACAC--AGCCGGCACATAAAAC--ACATACT--TGCAAC-TATATTAGTCC  
 Fomln\_006\_0 -----CCGGCACATAAAACAT--AGCCGGCACATAAAACAC--AGCCGGCACATAAAAC--ACATACT--TGCAAC-TATATTAGTCC  
 Fomln\_012\_0 -----CCGGCACATAAAACAT--AGCCGGCACATAAAACAC--AGCCGGCACATAAAAC--ACATACT--TGCAAC-TATATTAGTCC  
 Fomln\_013\_0 -----CCGGCACATAAAACAT--AGCCGGCACATAAAACAC--AGCCGGCACATAAAAC--ACATACT--TGCAAC-TATATTAGTCC

Fotul\_Tu67\_1 GGACCTCCTCTT--TCTATGCTCTT--CGTTCC--ACACCATTCTCAG--TCGTATCAATTTCA--TTAAATCTTC  
Folag\_002\_2 GGATCTCCTCTCTT--TCTATGCTCTT--CGTTCC--ACACCATTCTAAG--TCGTACCAATTTCA--TTAAGTCTTC  
Focuc\_037\_1 GGATCTCCTCTCTT--TCTTTGCTCTT--CGTTCC--ACACCATTCTAAG--TCGTATCAATTTCA--TTAAGTCTTC  
Fomln\_012\_1 GGATCTCCTCTCTT--TCTTTGCTCTT--CGTTCC--ACACCATTCTAAG--TCGTATCAATTTCA--TTAAGTCTTC  
Foluf\_001\_3 GGATCTCCTCTCTT--TCTTTGCTCTT--CGTTCC--ACACCATTCTAAG--TCGTATCAATTTCA--TTAAGTCTTC  
Fomln\_013\_2 GGATCTCCTCTCTT--TCTTTGCTCTT--CGTTCC--ACACCATTCTAAG--TCGTATCAATTTCA--TTAAGTCTTC  
Fomln\_001\_2 GGATCTCCTCTCTT--TCTTTGCTCTT--CGTTCC--ACACCATTCTAAG--TCGTATCAATTTCA--TTAAGTCTTC  
Fomln\_004\_2 GGATCTCCTCTCTT--TCTTTGCTCTT--CGTTCC--ACACCATTCTAAG--TCGTATCAATTTCA--TTAAGTCTTC  
Fomln\_005\_2 GGATCTCCTCTCTT--TCTTTGCTCTT--CGTTCC--ACACCATTCTAAG--TCGTATCAATTTCA--TTAAGTCTTC  
Fomln\_006\_2 GGATCTCCTCTCTT--TCTTTGCTCTT--CGTTCC--ACACCATTCTAAG--TCGTATCAATTTCA--TTAAGTCTTC  
Foluf\_016\_2 GGATCTCCTCTCTT--TCTTTGCTCTT--CGTTCC--ACACCATTCTAAG--TCGTATCAATTTCA--TTAAGTCTTC  
Forcu\_016\_2 GGATCTCCTCTCTT--TCTTTGCTCTT--CGTTCC--ACACCATTCTAAG--TCGTATCAATTTCA--TTAAGTCTTC  
Forcu\_024\_2 GGATCTCCTCTCTT--TCTTTGCTCTT--CGTTCC--ACACCATTCTAAG--TCGTATCAATTTCA--TTAAGTCTTC  
Forcu\_031\_1 GGATCTCCTCTCTT--TCTTTGCTCTT--CGTTCC--ACACCATTCTAAG--TCGTATCAATTTCA--TTAAGTCTTC  
Foluf\_001\_2 TGATCCCATCTCCT--TCCTTACCCTC--CTCTCT--ATACCCCTTTCAA--TCCCTCCATCCCTG--TTAAATCTTA  
Foluf\_002\_2 TGATCCCATCTCCT--TCCTTACCCTC--CTCTCT--ATACCCCTTTCAA--TCCCTCCATCCCTG--TTAAATCTTA  
Foluf\_001\_1 ATATCCCATCTCTTGTGCCATCTCCCTCTTTCTCTT--GTTTTC--ACAGCATACCAA--CTACACCATCCCTG--TTGAAGTTC  
Foluf\_002\_1 ATATCCCATCTCTTGTGCCATCTCCCTCTTTCTCTT--GTTTTC--ACAGCATACCAA--CTACACCATCCCTG--TTGAAGTTC  
Fomln\_009 -----TCTTTCTCTT--TTTCCC-----CCTTGGCTTAG--ACAGGGCAATCTAAGGCCACCCCACTGTTAC  
Fomln\_011 -----TGCTCTCTT-----TCCT--CTTTT-----CCCTTGGCTTAG--ACAGGGCAATCTAAGGCCACCCCACTGTTAC  
Fopis\_HDV247\_0 GAAGCCCGCAATG--TAGTTGCCATTGGCACCAGAACGCTGAACGGCATCTCTGGGACCACGGAAAGCCCGGAGGAATTAAGTTTT  
Fopis\_HDV247\_1 TAATGCCGACAGC--CGAGGACGCAT--GGTGCATGAGCGAAGAGACCTTGTACGGA-----AGCCCCGGAGGAATTAAGTTTT  
Fopis\_HDV247\_2 TAATGCCGACAGC--CGAGGACGCAT--GGTGCATGAGCGAAGAGACCTTGTACGGA-----AGCCCCGGAGGAATTAAGTTTT  
Fotul\_Tu67\_0 AGG-----GTACCTGGTCTGG--TCGTG-----  
Forap\_PHW815 AGATCCCATAATTTCT--TCCATACTCTT--CTTTCC--ACACCCTTTCAA--TCCCATCAGCTCA-----TTAAAGTTC  
Forcu\_016\_1 A-ATCCCATCTCCT--TCAATTCCTT--CTCTCC--ACACCCTTTCCNNN--NNNNNNNNNN  
Fomln\_016\_1 A-ATCCCATCTCCT--TCAATTCCTT--CTCTCC--ACACCCTTTCTAG--TCCCATCAGCTCA-----TTGAAGTTTC  
Fomln\_006\_1 A-ATCCCATCTCCT--TCAATTCCTT--CTCTCC--ACACCCTTTCTAG--TCCCATCAGCTCA-----TTGAAGTTTC  
Fomln\_001\_1 A-ATCCCATCTCCT--TCAATTCCTT--CTCTCC--ACACCCTTTCTAG--TCCCATCAGCTCA-----TTGAAGTTTC  
Fomln\_004\_1 A-ATCCCATCTCCT--TCAATTCCTT--CTCTCC--ACACCCTTTCTAG--TCCCATCAGCTCA-----TTGAAGTTTC  
Fomln\_005\_1 A-ATCCCATCTCCT--TCAATTCCTT--CTCTCC--ACACCCTTTCTAG--TCCCATCAGCTCA-----TTGAAGTTTC  
Fomln\_013\_1 A-ATCCCATCTCCT--TCAATTCCTT--CTCTCC--ACACCCTTTCTAG--TCCCATCAGCTCA-----TTGAAGTTTC  
Forcu\_024\_1 A-ATCCCATCTCCT--TCAATTCCTT--CTCTCC--ACACCCTTTCTAG--TCCCATCAGCTCA-----TTGAAGTTTC  
Foniv\_005 A-ATCCCATCTCCT--TCAATTCCTT--CTCTCC--ACACCCTTTCAA--TCCCATCAGCTCA-----TTGAAGTTTC  
Foniv\_010 A-ATCCCATCTCCT--TCAATTCCTT--CTCTCC--ACACCCTTTCAA--TCCCATCAGCTCA-----TTGAAGTTTC  
Foniv\_020 A-ATCCCATCTCCT--TCAATTCCTT--CTCTCC--ACACCCTTTCAA--TCCCATCAGCTCA-----TTGAAGTTTC  
Foluf\_002\_0 A-ATCCCATCTCCT--TCAATTCCTT--CTCTCC--ACACCCTTTCAA--TCCCATCAGCTCA-----TTGAAGTTTC  
Fomom\_001 A-ATCCCATCTCCT--TCAATTCCTT--CTCTCC--ACACCCTTTCAA--TCCCATCAGCTCA-----TTGAAGTTTC  
Foluf\_001\_0 A-ATCCCATCTCCT--TCAATTCCTT--CTCTCC--ACACCCTTTCAA--TCCCATCAGCTCA-----TTGAAGTTTC  
Fomom\_004 A-ATCCCATCTCCT--TCAATTCCTT--CTCTCC--ACACCCTTTCAA--TCCCATCAGCTCA-----TTGAAGTTTC  
Folag\_002\_1 A-ATCCCATCTCCT--TCAATTCCTT--CTCTCC--ACACCCTTTCAA--TCCCATCAGCTCA-----TTGAAGTTTC  
Foniv\_015 A-ATCCCATCTCCT--TCAATTCCTT--CTCTCC--ACACCCTTTCAA--TCCCATCAGCTCA-----TTGAAGTTTC  
Foniv\_021 A-ATCCCATCTCCT--TCAATTCCTT--CTCTCC--ACACCCTTTCAA--TCCCATCAGCTCA-----TTGAAGTTTC  
Foniv\_037 A-ATCCCATCTCCT--TCAATTCCTT--CTCTCC--ACACCCTTTCAA--TCCCATCAGCTCA-----TTGAAGTTTC  
Focuc\_011 A-ATCCCATCTCCT--TCAATTCCTT--CTCTCC--ACACCCTTTCAA--TCCCATCAGCTCA-----TTGAAGTTTC  
Focuc\_035 A-ATCCCATCTCCT--TCAATTCCTT--CTCTCC--ACACCCTTTCAA--TCCCATCAGCTCA-----TTGAAGTTTC  
Focuc\_037\_0 A-ATCCCATCTCCT--TCAATTCCTT--CTCTCC--ACACCCTTTCAA--TCCCATCAGCTCA-----TTGAAGTTTC  
Focuc\_001 A-ATCCCATCTCCT--TCAATTCCTT--CTCTCC--ACACCCTTTCAA--TCCCATCAGCTCA-----TTGAAGTTTC  
Focuc\_013 A-ATCCCATCTCCT--TCAATTCCTT--CTCTCC--ACACCCTTTCAA--TCCCATCAGCTCA-----TTGAAGTTTC  
Focuc\_015 A-ATCCCATCTCCT--TCAATTCCTT--CTCTCC--ACACCCTTTCAA--TCCCATCAGCTCA-----TTGAAGTTTC  
Folag\_001 A-ATCCCATCTCCT--TCAATTCCTT--CTCTCC--ACACCCTTTCAA--TCCCATCAGCTCA-----TTGAAGTTTC  
Folag\_005\_1 A-ATCCCATCTCCT--TCAATTCCTT--CTCTCC--ACACCCTTTCAA--TCCCATCAGCTCA-----TTGAAGTTTC  
Foniv\_002 A-ATCCCATCTCCT--TCAATTCCTT--CTCTCC--ACACCCTTTCAA--TCCCATCAGCTCA-----TTGAAGTTTC  
Foniv\_013 A-ATCCCATCTCCT--TCAATTCCTT--CTCTCC--ACACCCTTTCAA--TCCCATCAGCTCA-----TTGAAGTTTC  
Foniv\_019 A-ATCCCATCTCCT--TCAATTCCTT--CTCTCC--ACACCCTTTCAA--TCCCATCAGCTCA-----TTGAAGTTTC  
Focuc\_018 A-ATCCCATCTCCT--TCAATTCCTT--CTCTCC--ACACCCTTTCAA--TCCCATCAGCTCA-----TTGAAGTTTC  
Focuc\_021 A-ATCCCATCTCCT--TCAATTCCTT--CTCTCC--ACACCCTTTCAA--TCCCATCAGCTCA-----TTGAAGTTTC  
Focuc\_030 A-ATCCCATCTCCT--TCAATTCCTT--CTCTCC--ACACCCTTTCAA--TCCCATCAGCTCA-----TTGAAGTTTC  
Folag\_002\_0 AGGTCCCATCTCCT--TCAATTCCTT--CTTTCC--ACACCCTTTCAA--TCCCATCAGCTCA-----TTGAAGTTTC  
Folag\_004 AGGTCCCATCTCCT--TCAATTCCTT--CTTTCC--ACACCCTTTCAA--TCCCATCAGCTCA-----TTGAAGTTTC  
Folag\_005\_0 AGGTCCCATCTCCT--TCAATTCCTT--CTTTCC--ACACCCTTTCAA--TCCCATCAGCTCA-----TTGAAGTTTC  
Forcu\_031\_0 AGATCCCATCTCCT--TCAATTCCTT--CTTTCC--ACACCCTTTCAA--TCCCATCAGCTCA-----TTGAAATTTTC  
Forcu\_024\_0 AGATCCCATCTCCT--TCAATTCCTT--CTTTCC--ACACCCTTTCAA--TCCCATCAGCTCA-----TTGAAATTTTC  
Forcu\_016\_0 AGATCCCATCTCCT--TCAATTCCTT--CTTTCC--ACACCCTTTCAA--TCCCATCAGCTCA-----TTGAAATTTTC  
Fomln\_016\_0 AGATCCCATCTCCT--TCAATTCCTT--CTTTCC--ACACCCTTTCAA--TCCCATCAGCTCA-----TTGAAATTTTC  
Fomln\_005\_0 AGATCCCATCTCCT--TCAATTCCTT--CTTTCC--ACACCCTTTCAA--TCCCATCAGCTCA-----TTGAAATTTTC  
Fomln\_001\_0 AGATCCCATCTCCT--TCAATTCCTT--CTTTCC--ACACCCTTTCAA--TCCCATCAGCTCA-----TTGAAATTTTC  
Fomln\_004\_0 AGATCCCATCTCCT--TCAATTCCTT--CTTTCC--ACACCCTTTCAA--TCCCATCAGCTCA-----TTGAAATTTTC  
Fomln\_006\_0 AGATCCCATCTCCT--TCAATTCCTT--CTTTCC--ACACCCTTTCAA--TCCCATCAGCTCA-----TTGAAATTTTC  
Fomln\_012\_0 AGATCCCATCTCCT--TCAATTCCTT--CTTTCC--ACACCCTTTCAA--TCCCATCAGCTCA-----TTGAAATTTTC  
Fomln\_013\_0 AGATCCCATCTCCT--TCAATTCCTT--CTTTCC--ACACCCTTTCAA--TCCCATCAGCTCA-----TTGAAATTTTC

fp7304 fwd >  
cucurbit-infecting  
strains

|                |                                                            |                   |                                   |                        |
|----------------|------------------------------------------------------------|-------------------|-----------------------------------|------------------------|
| Fotul_Tu67_1   | AACATGAAATTCCTTACTGTCC                                     | TGCCTTTGTCPTTACT  | GGCCTGGCGCTAG                     | CTACCAAGCCTGACCCACTGG  |
| Folag_002_2    | AACATGAGATGCCTTACTGTCC                                     | TGCCTTTGTCPTTACT  | GGCCTGGCGCTAG                     | CTACCAAGCCTCAACCCACTGG |
| Focuc_037_1    | AACATGAGATGCCTTACTGTCC                                     | TGCCTTTGTCPTTACT  | GGCCTGGCGCTAG                     | CTACCAAGCCTCAACCCACTGG |
| Fomln_012_1    | AACATGAGATGCCTTACTGTCC                                     | TGCCTTTGTCPTTACT  | GGCCTGGCGCTAG                     | CTACCAAGCCTCAACCCACTGG |
| Foluf_001_3    | AACATGAGATGCCTTACTGTCC                                     | TGCCTTTGTCPTTACT  | GGCCTGGCGCTAG                     | CTACCAAGCCTCAACCCACTGG |
| Fomln_013_2    | AACATGAGATGCCTTACTGTCC                                     | TGCCTTTGTCPTTACT  | GGCCTGGCGCTAG                     | CTACCAAGCCTCAACCCACTGG |
| Fomln_001_2    | AACATGAGATGCCTTACTGTCC                                     | TGCCTTTGTCPTTACT  | GGCCTGGCGCTAG                     | CTACCAAGCCTCAACCCACTGG |
| Fomln_004_2    | AACATGAGATGCCTTACTGTCC                                     | TGCCTTTGTCPTTACT  | GGCCTGGCGCTAG                     | CTACCAAGCCTCAACCCACTGG |
| Fomln_005_2    | AACATGAGATGCCTTACTGTCC                                     | TGCCTTTGTCPTTACT  | GGCCTGGCGCTAG                     | CTACCAAGCCTCAACCCACTGG |
| Fomln_006_2    | AACATGAGATGCCTTACTGTCC                                     | TGCCTTTGTCPTTACT  | GGCCTGGCGCTAG                     | CTACCAAGCCTCAACCCACTGG |
| Fomln_016_2    | AACATGAGATGCCTTACTGTCC                                     | TGCCTTTGTCPTTACT  | GGCCTGGCGCTAG                     | CTACCAAGCCTCAACCCACTGG |
| Forcu_016_2    | AACATGAGATGCCTTACTGTCC                                     | TGCCTTTGTCPTTACT  | GGCCTGGCGCTAG                     | CTACCAAGCCTCAACCCACTGG |
| Forcu_024_2    | AACATGAGATGCCTTACTGTCC                                     | TGCCTTTGTCPTTACT  | GGCCTGGCGCTAG                     | CTACCAAGCCTCAACCCACTGG |
| Forcu_031_1    | AACATGAGATGCCTTACTGTCC                                     | TGCCTTTGTCPTTACT  | GGCCTGGCGCTAG                     | CTACCAAGCCTCAACCCACTGG |
| Foluf_001_2    | AGCATGAGATTCCTTACTGTCC                                     | TGCCTTTGTCPTTACT  | GGCTGGCGCTAG                      | CCACAAGCCAAATCCACGCAA  |
| Foluf_002_2    | AGCATGAGATTCCTTACTGTCC                                     | TGCCTTTGTCPTTACT  | GGCTGGCGCTAG                      | CCACAAGCCAAATCCACGCAA  |
| Foluf_001_1    | AACATGAGGTTCCCTACTCTCC                                     | TGCCTTTGTCPTTACT  | GCTCTGGCGCTAA                     | CCACTAATCCAAATCCAAATAA |
| Foluf_002_1    | AACATGAGGTTCCCTACTCTCC                                     | TGCCTTTGTCPTTACT  | GCTCTGGCGCTAA                     | CCACTAATCCAAATCCAAATAA |
| Fomln_009      | AACAT- AAAGGCTCCGCTATTTAGAAATTCCTTCTATTGCTATTTTAAACTTTAAAC |                   |                                   | CCCTTAATTAGCGTTTCCTTTG |
| Fomln_011      | AACAT- AAAGGCTCCGCTATTTAGAAATTCCTTCTATTGCTATTTTAAACTTTAAAC |                   |                                   | CCCTTAATTAGCGTTTCCTTTG |
| Fopis_HDV247_0 | ATTAGTAGGGTC                                               | TCAGGCAGGTC       | AGCTAAGTGCCGG                     | CCGGGAATTCCTCGGCTTTCA  |
| Fopis_HDV247_1 | ATTAGTAGGGTC                                               | TCAGGCAGGTC       | AGCTAAGTGCCGG                     | CCGGGAATTCCTCGGCTTTCA  |
| Fopis_HDV247_2 | ATTAGTAGGGTC                                               | TCAGGCAGGTC       | AGCTAAGTGCCGG                     | CCGGGAATTCCTCGGCTTTCA  |
| Fotul_Tu67_0   |                                                            |                   | C                                 | GCTGTGAC               |
| Forap_PHW815   | AACATGAGATTCCTCACTCTCC                                     | TGCCTTTGTCPTTACT  | GCTCTGGCGCTAGCCACCAAGCCAAATCCAAAC | CCACAAGCCAAATCCAACTTGG |
| Forcu_016_1    |                                                            | NN                | NNNNNNNGCCTGG                     | CCACAAGCCAGTCCAACTTGG  |
| Fomln_016_1    | AACATGAAATTCCTCACTCTCC                                     | TGCCTTCTGTCPTTACT | GCTCTAGCGCTGG                     | CCACAAGCCAGTCCAACTTGG  |
| Fomln_006_1    | AACATGAAATTCCTCACTCTCC                                     | TGCCTTCTGTCPTTACT | GCTCTAGCGCTGG                     | CCACAAGCCAGTCCAACTTGG  |
| Fomln_001_1    | AACATGAAATTCCTCACTCTCC                                     | TGCCTTCTGTCPTTACT | GCTCTAGCGCTGG                     | CCACAAGCCAGTCCAACTTGG  |
| Fomln_004_1    | AACATGAAATTCCTCACTCTCC                                     | TGCCTTCTGTCPTTACT | GCTCTAGCGCTGG                     | CCACAAGCCAGTCCAACTTGG  |
| Fomln_005_1    | AACATGAAATTCCTCACTCTCC                                     | TGCCTTCTGTCPTTACT | GCTCTAGCGCTGG                     | CCACAAGCCAGTCCAACTTGG  |
| Fomln_013_1    | AACATGAAATTCCTCACTCTCC                                     | TGCCTTCTGTCPTTACT | GCTCTAGCGCTGG                     | CCACAAGCCAGTCCAACTTGG  |
| Forcu_024_1    | AACATGAAATTCCTCACTCTCC                                     | TGCCTTCTGTCPTTACT | GCTCTAGCGCTGG                     | CCACAAGCCAGTCCAACTTGG  |
| Foniv_005      | AACATGAAATTCCTCACTCTCC                                     | TGCCTTCTGTCPTTACT | GCTCTGGCGCTGG                     | CCACAAGCCAGTCCAACTTGG  |
| Foniv_010      | AACATGAAATTCCTCACTCTCC                                     | TGCCTTCTGTCPTTACT | GCTCTGGCGCTGG                     | CCACAAGCCAGTCCAACTTGG  |
| Foniv_020      | AACATGAAATTCCTCACTCTCC                                     | TGCCTTCTGTCPTTACT | GCTCTGGCGCTGG                     | CCACAAGCCAGTCCAACTTGG  |
| Foluf_002_0    | AACATGAAATTCCTCACTCTCC                                     | TGCCTTCTGTCPTTACT | GCTCTGGCGCTGG                     | CCACAAGCCAGTCCAACTTGG  |
| Fomom_001      | AACATGAAATTCCTCACTCTCC                                     | TGCCTTCTGTCPTTACT | GCTCTGGCGCTGG                     | CCACAAGCCAGTCCAACTTGG  |
| Foluf_001_0    | AACATGAAATTCCTCACTCTCC                                     | TGCCTTCTGTCPTTACT | GCTCTGGCGCTGG                     | CCACAAGCCAGTCCAACTTGG  |
| Fomom_004      | AACATGAAATTCCTCACTCTCC                                     | TGCCTTCTGTCPTTACT | GCTCTGGCGCTGG                     | CCACAAGCCAGTCCAACTTGG  |
| Folag_002_1    | AACATGAAATTCCTCACTCTCC                                     | TGCCTTCTGTCPTTACT | GCTCTGGCGCTGG                     | CCACAAGCCAGTCCAACTTGG  |
| Foniv_015      | AACATGAAATTCCTCACTCTCC                                     | TGCCTTCTGTCPTTACT | GCTCTGGCGCTGG                     | CCACAAGCCAGTCCAACTTGG  |
| Foniv_021      | AACATGAAATTCCTCACTCTCC                                     | TGCCTTCTGTCPTTACT | GCTCTGGCGCTGG                     | CCACAAGCCAGTCCAACTTGG  |
| Foniv_037      | AACATGAAATTCCTCACTCTCC                                     | TGCCTTCTGTCPTTACT | GCTCTGGCGCTGG                     | CCACAAGCCAGTCCAACTTGG  |
| Focuc_011      | AACATGAAATTCCTCACTCTCC                                     | TGCCTTCTGTCPTTACT | GCTCTGGCGCTGG                     | CCACAAGCCAGTCCAACTTGG  |
| Focuc_035      | AACATGAAATTCCTCACTCTCC                                     | TGCCTTCTGTCPTTACT | GCTCTGGCGCTGG                     | CCACAAGCCAGTCCAACTTGG  |
| Focuc_037_0    | AACATGAAATTCCTCACTCTCC                                     | TGCCTTCTGTCPTTACT | GCTCTGGCGCTGG                     | CCACAAGCCAGTCCAACTTGG  |
| Focuc_001      | AACATGAAATTCCTCACTCTCC                                     | TGCCTTCTGTCPTTACT | GCTCTGGCGCTGG                     | CCACAAGCCAGTCCAACTTGG  |
| Focuc_013      | AACATGAAATTCCTCACTCTCC                                     | TGCCTTCTGTCPTTACT | GCTCTGGCGCTGG                     | CCACAAGCCAGTCCAACTTGG  |
| Focuc_015      | AACATGAAATTCCTCACTCTCC                                     | TGCCTTCTGTCPTTACT | GCTCTGGCGCTGG                     | CCACAAGCCAGTCCAACTTGG  |
| Folag_001      | AACATGAAATTCCTCACTCTCC                                     | TGCCTTCTGTCPTTACT | GCTCTGGCGCTGG                     | CCACAAGCCAGTCCAACTTGG  |
| Folag_005_1    | AACATGAAATTCCTCACTCTCC                                     | TGCCTTCTGTCPTTACT | GCTCTGGCGCTGG                     | CCACAAGCCAGTCCAACTTGG  |
| Foniv_002      | AACATGAAATTCCTCACTCTCC                                     | TGCCTTCTGTCPTTACT | GCTCTGGCGCTGG                     | CCACAAGCCAGTCCAACTTGG  |
| Foniv_013      | AACATGAAATTCCTCACTCTCC                                     | TGCCTTCTGTCPTTACT | GCTCTGGCGCTGG                     | CCACAAGCCAGTCCAACTTGG  |
| Foniv_019      | AACATGAAATTCCTCACTCTCC                                     | TGCCTTCTGTCPTTACT | GCTCTGGCGCTGG                     | CCACAAGCCAGTCCAACTTGG  |
| Focuc_018      | AACATGAAATTCCTCACTCTCC                                     | TGCCTTCTGTCPTTACT | GCTCTGGCGCTGG                     | CCACAAGCCAGTCCAACTTGG  |
| Focuc_021      | AACATGAAATTCCTCACTCTCC                                     | TGCCTTCTGTCPTTACT | GCTCTGGCGCTGG                     | CCACAAGCCAGTCCAACTTGG  |
| Focuc_030      | AACATGAAATTCCTCACTCTCC                                     | TGCCTTCTGTCPTTACT | GCTCTGGCGCTGG                     | CCACAAGCCAGTCCAACTTGG  |
| Folag_002_0    | AACATGAAATTCCTCACTCTCC                                     | TGCCTTCTGTCPTTACT | GCTCTGGCGCTGG                     | CCACAAGCCAGTCCAACTTGG  |
| Folag_004      | AACATGAAATTCCTCACTCTCC                                     | TGCCTTCTGTCPTTACT | GCTCTGGCGCTGG                     | CCACAAGCCAGTCCAACTTGG  |
| Folag_005_0    | AACATGAAATTCCTCACTCTCC                                     | TGCCTTCTGTCPTTACT | GCTCTGGCGCTGG                     | CCACAAGCCAGTCCAACTTGG  |
| Forcu_031_0    | AACATGAAATTCCTCACTCTCC                                     | TGCCTTCTGTCPTTACT | GCTCTGGCGCTGG                     | CCACAAGCCAGTCCAACTTGG  |
| Forcu_024_0    | AACATGAAATTCCTCACTCTCC                                     | TGCCTTCTGTCPTTACT | GCTCTGGCGCTGG                     | CCACAAGCCAGTCCAACTTGG  |
| Forcu_016_0    | AACATGAAATTCCTCACTCTCC                                     | TGCCTTCTGTCPTTACT | GCTCTGGCGCTGG                     | CCACAAGCCAGTCCAACTTGG  |
| Fomln_016_0    | AACATGAAATTCCTCACTCTCC                                     | TGCCTTCTGTCPTTACT | GCTCTGGCGCTGG                     | CCACAAGCCAGTCCAACTTGG  |
| Fomln_005_0    | AACATGAAATTCCTCACTCTCC                                     | TGCCTTCTGTCPTTACT | GCTCTGGCGCTGG                     | CCACAAGCCAGTCCAACTTGG  |
| Fomln_001_0    | AACATGAAATTCCTCACTCTCC                                     | TGCCTTCTGTCPTTACT | GCTCTGGCGCTGG                     | CCACAAGCCAGTCCAACTTGG  |
| Fomln_004_0    | AACATGAAATTCCTCACTCTCC                                     | TGCCTTCTGTCPTTACT | GCTCTGGCGCTGG                     | CCACAAGCCAGTCCAACTTGG  |
| Fomln_006_0    | AACATGAAATTCCTCACTCTCC                                     | TGCCTTCTGTCPTTACT | GCTCTGGCGCTGG                     | CCACAAGCCAGTCCAACTTGG  |
| Fomln_012_0    | AACATGAAATTCCTCACTCTCC                                     | TGCCTTCTGTCPTTACT | GCTCTGGCGCTGG                     | CCACAAGCCAGTCCAACTTGG  |
| Fomln_013_0    | AACATGAAATTCCTCACTCTCC                                     | TGCCTTCTGTCPTTACT | GCTCTGGCGCTGG                     | CCACAAGCCAGTCCAACTTGG  |

fp7304 fwd >  
cucurbit-infecting  
strains

















```

Fotul_Tu67_1 -----GGCTTTTTATTTTTTTTATTTTTAGGGGGGGGGGGGGGGNNAA-----
Folag_002_2 GTTTTTTTTTTTTTTTTTTTTTTTTTTTTTTTTTTTTTTTTTGGGGGGGGGGGGGG-----
Focuc_037_1 GGGGGGGGGTTTGGGTTTGAATTGTTCCTTCGTCGCGAACGTC-----
Fomln_012_1 GGGGGGGGGTTTGGGTTTGAATTGTTCCTTCGTCGCGAACGTC-----
Foluf_001_3 GGGGGGGGGTTTGGGTTTGAATTGTTCCTTCGTCGCGAACGTC-----
Fomln_013_2 GGGGGGGGGTTTGGGTTTGAATTGTTCCTTCGTCGCGAACGTC-----
Fomln_001_2 GGGGGGGGGTTTGGGTTTGAATTGTTCCTTCGTCGCGAACGTC-----
Fomln_004_2 GGGGGGGGGTTTGGGTTTGAATTGTTCCTTCGTCGCGAACGTC-----
Fomln_005_2 GGGGGGGGGTTTGGGTTTGAATTGTTCCTTCGTCGCGAACGTC-----
Fomln_006_2 GGGGGGGGGTTTGGGTTTGAATTGTTCCTTCGTCGCGAACGTC-----
Fomln_016_2 GGGGGGGGGTTTGGGTTTGAATTGTTCCTTCGTCGCGAACGTC-----
Forcu_016_2 GGGGGGGGGTTTGGGTTTGAATTGTTCCTTCGTCGCGAACGTC-----
Forcu_024_2 GGGGGGGGGTTTGGGTTTGAATTGTTCCTTCGTCGCGAACGTC-----
Forcu_031_1 GGGGGGGGGTTTGGGTTTGAATTGTTCCTTCGTCGCGAACGTC-----
Foluf_001_2 TCGAGGTACTGGACCCAAGTTAGCCGAG-----
Foluf_002_2 TCGAGGTACTGGACCCAAGTTAGCCGAG-----
Foluf_001_1 CTGTACGTAAGAGAGAAA-----
Foluf_002_1 CTTGTACGTAAGAGAGAAAT-----
Fomln_009 -----AGCCGGGGGGCCTTTGG-----
Fomln_011 -----AGCCGGGGGGCCTTTGG-----
Fopis_HDV247_0 -----AGCCGGGAG-----
Fopis_HDV247_1 -----AGCCGGGAG-----
Fopis_HDV247_2 -----AGCCGGGGA-----
Fotul_Tu67_0 -----AGCCGGGGGGCCTTTGGG-----
Forap_PHW815 -----AACC GGAGGGCCTTTGACCTGT-----
Forcu_016_1 -----NN-----
Fomln_016_1 -----AG-----
Fomln_006_1 -----AG-----
Fomln_001_1 -----AGC-----
Fomln_004_1 -----AGC-----
Fomln_005_1 -----AGC-----
Fomln_013_1 -----AGC-----
Forcu_024_1 -----AGC-----
Foniv_005 -----AGCCGGGAGGCCTTTGGGTTGTTTCCTTCTTACGAAAGCCTCTATCTTGGAGCTTTCGTTTA
Foniv_010 -----
Foniv_020 -----AGCCG-----
Foluf_002_0 -----AGCCG-----
Fomom_001 -----AGCCG-----
Foluf_001_0 -----AGCCGG-----
Fomom_004 -----AGCCGG-----
Folag_002_1 -----AGCC-----
Foniv_015 -----AGCC-----
Foniv_021 -----AGCC-----
Foniv_037 -----AGCC-----
Focuc_011 -----AGCCGG-----
Focuc_035 -----AGCCGG-----
Focuc_037_0 -----AGCCGG-----
Focuc_001 -----AGCCG-----
Focuc_013 -----AGCCG-----
Focuc_015 -----AGCCG-----
Folag_001 -----AGCCG-----
Folag_005_1 -----AGCCG-----
Foniv_002 -----AGCCG-----
Foniv_013 -----AGCCG-----
Foniv_019 -----AGCCG-----
Focuc_018 -----AGCCG-----
Focuc_021 -----AGCCG-----
Focuc_030 -----AGCC-----
Folag_002_0 TTTTGTATGGCCAGCCGCGAAAGAACGCGC-----
Folag_004 TTTTGTATGGCCAGCCGCGAAAGAACGCGC-----
Folag_005_0 TTTTGTATGGCCAGCCGCGAAAGAACGCGCA-----
Forcu_031_0 -----AGCCGGGGGAC-----
Forcu_024_0 -----AGCCGGGGGAC-----
Forcu_016_0 -----AGCCGGGGGAC-----
Fomln_016_0 -----AGCCGGGGGAC-----
Fomln_005_0 -----AGCCGGGGGAC-----
Fomln_001_0 -----AGCCGGGGGAC-----
Fomln_004_0 -----AGCCGGGGGACC-----
Fomln_006_0 -----AGCCGGGGGACC-----
Fomln_012_0 -----AGCCGGGGGACC-----
Fomln_013_0 -----AGCCGGGGGACC-----

```

```
1
Fobul_G14      --NNGTCTCATGGCCCTAC--CCGAGTAGTAGAATCGGGAAAAGATAAAATAGAGATATATGGCCTACT-----CATATCTTGGGTTTC----GAA
Folyc_002     TAAAACTACTATGGTATTGTATATAGAATAGTTGAATCGGGAAAAGATAAAATAGAGATATATGGCCTACT-----CATATCTTAGGTTTC----GA-
Folyc_014     TAAAACTACTATGGTATTGTATATAGAATAGTTGAATCGGGAAAAGATAAAATAGAGATATATGGCCTACT-----CATATCTTAGGTTTC----GA-
Folyc_016     TAAAACTACTATGGTATTGTATATAGAATAGTTGAATCGGGAAAAGATAAAATAGAGATATATGGCCTACT-----CATATCTTAGGTTTC----GA-
Folyc_018     TAAAACTACTATGGTATTGTATATAGAATAGTTGAATCGGGAAAAGATAAAATAGAGATATATGGCCTACT-----CATATCTTAGGTTTC----GA-
Folyc_038     TAAAACTACTATGGTATTGTATATAGAATAGTTGAATCGGGAAAAGATAAAATAGAGATATATGGCCTACT-----CATATCTTAGGTTTC----GA-
Folyc_072     TAAAACTACTATGGTATTGTATATAGAATAGTTGAATCGGGAAAAGATAAAATAGAGATATATGGCCTACT-----CATATCTTAGGTTTC----GA-
Folyc_4287_0  TAAAACTACTATGGTATTGTATATAGAATAGTTGAATCGGGAAAAGATAAAATAGAGATATATGGCCTACT-----CATATCTTAGGTTTC----GA-
Folyc_004     -AAAACTACTATGGTATTGTATATAGAATAGTTGAATCGGGAAAAGATAAAATAGAGATATATGGCCTACT-----CATATCTTAGGTTTC----GA-
Folyc_026     -AAAACTACTATGGTATTGTATATAGAATAGTTGAATCGGGAAAAGATAAAATAGAGATATATGGCCTACT-----CATATCTTAGGTTTC----GA-
Folyc_029     -AAAACTACTATGGTATTGTATATAGAATAGTTGAATCGGGAAAAGATAAAATAGAGATATATGGCCTACT-----CATATCTTAGGTTTC----GA-
Folyc_069     -AAAACTACTATGGTATTGTATATAGAATAGTTGAATCGGGAAAAGATAAAATAGAGATATATGGCCTACT-----CATATCTTAGGTTTC----GA-
Folyc_073     -AAAACTACTATGGTATTGTATATAGAATAGTTGAATCGGGAAAAGATAAAATAGAGATATATGGCCTACT-----CATATCTTAGGTTTC----GA-
Folyc_074     -AAAACTACTATGGTATTGTATATAGAATAGTTGAATCGGGAAAAGATAAAATAGAGATATATGGCCTACT-----CATATCTTAGGTTTC----GA-
Folyc_4287_1  -AAAACTACTATGGTATTGTATATAGAATAGTTGAATCGGGAAAAGATAAAATAGAGATATATGGCCTACT-----CATATCTTAGGTTTC----GA-
Folyc_MN25    -AAAACTACTATGGTATTGTATATAGAATAGTTGAATCGGGAAAAGATAAAATAGAGATATATGGCCTACT-----CATATCTTAGGTTTC----GA-
Fophy_KOD886 -AAAACTACTATGGTATTGTATATAGAATAGTTGAATCGGGAAAAGATAAAATAGAGATATATGGCCTACT-----CATATCTTAGGTTTC----GA-
Fophy_KOD887 -AAAACTACTATGGTATTGTATATAGAATAGTTGAATCGGGAAAAGATAAAATAGAGATATATGGCCTACT-----CATATCTTAGGTTTC----GA-
Fophy_KOD888 TAAAACTACTATGGTATTGTATATAGAATAGTTGAATCGGGAAAAGATAAAATAGAGATATATGGCCTACT-----CATATCTTAGGTTTC----GA-
Focub_B2_0    -----TACTATGGTATTATATATAGAATAGTTGAATCGGGAAAAGATAAAATAGAGATATATGGCCTACT-----CATATCTTAGGTTTC----GAA
Fomel_001     -----TACTATGGTATTATATATAGAATAGTTGAATCGGGAAAAGATAAAATAGAGATATATGGCCTACT-----CATATCTTAGGTTTC----GAA
Foniv_013     -----TCCTGTGTAGCCAATCGCATTTCTGTAATAGTTGTGTAGATAGATTCCGATTTCTCTAGCTCAGCACGTCCCTGTCTCCAGTAGGAG
Fovas_NRR125433 -----TCCTGTGTAGCCAATCGCATTTCTGTAATAGTTGTGTAGATAGATTCCGATTTCTCTAGCTCAGCACGTCCCTGTCTCCAGTAGGAG
Foniv_020     -----TACACATACATACATA-----CATA-----
Folag_001     -----
Folag_005     -----
Focuc_015    -GATGTAT---GTACTGTATATCGAATAGTGTAAATCGGGAAAAGATAAAATAGAGATATATGGCCTACT-----CATATCTTGGGTTTC----GAA
Focuc_037    GGATGTAT---GTACTGTATATCGAATAGTGTAAATCGGGAAAAGATAAAATAGAGATATATGGCCTACT-----CATATCTTGGGTTTC----GAA
Fomom_004     -----
Folil_39     ---ATACTATGGTATTATATACAGAATAGTTGAATCGGGAAAAGATAAAATAGAGATATATGGCCTACT-----CATATCTTAGGTTTC----GAA
Forcu_016    ---AAATACTACTATGGTATTATATAGAATAGTTGAATCGGGAAAAGATAAAATAGAGATATATGGCCTACT-----CATATCTTAGGTTTC----GAA
Forcu_024    ---AAATACTACTATGGTATTATATAGAATAGTTGAATCGGGAAAAGATAAAATAGAGATATATGGCCTACT-----CATATCTTAGGTTTC----GAA
Forcu_031    ---AAATACTACTATGGTATTATATAGAATAGTTGAATCGGGAAAAGATAAAATAGAGATATATGGCCTACT-----CATATCTTAGGTTTC----GAA
Fomln_001    ---TACTATGGTATTATATATAGAATAGTTGAATCGGGAAAAGATAAAATAGAGATATATGGCCTACT-----CATATCTTAGGTTTC----GAA
Fomln_004    ---TACTATGGTATTATATATAGAATAGTTGAATCGGGAAAAGATAAAATAGAGATATATGGCCTACT-----CATATCTTAGGTTTC----GAA
Fomln_006    ---TACTATGGTATTATATATAGAATAGTTGAATCGGGAAAAGATAAAATAGAGATATATGGCCTACT-----CATATCTTAGGTTTC----GAA
Fomln_012    ---TACTATGGTATTATATATAGAATAGTTGAATCGGGAAAAGATAAAATAGAGATATATGGCCTACT-----CATATCTTAGGTTTC----GAA
Fomln_016    ---TACTATGGTATTATATATAGAATAGTTGAATCGGGAAAAGATAAAATAGAGATATATGGCCTACT-----CATATCTTAGGTTTC----GAA
Fomln_005    ---ATACTATGGTATTATATATAGAATAGTTGAATCGGGAAAAGATAAAATAGAGATATATGGCCTACT-----CATATCTTAGGTTTC----GAA
Fomln_009    ---ATACTATGGTATTATATATAGAATAGTTGAATCGGGAAAAGATAAAATAGAGATATATGGCCTACT-----CATATCTTAGGTTTC----GAA
Fomln_010    ---ATACTATGGTATTATATATAGAATAGTTGAATCGGGAAAAGATAAAATAGAGATATATGGCCTACT-----CATATCTTAGGTTTC----GAA
Fomln_011    ---ATACTATGGTATTATATATAGAATAGTTGAATCGGGAAAAGATAAAATAGAGATATATGGCCTACT-----CATATCTTAGGTTTC----GAA
Fomln_013    ---ATACTATGGTATTATATATAGAATAGTTGAATCGGGAAAAGATAAAATAGAGATATATGGCCTACT-----CATATCTTAGGTTTC----GAA
Focuc_018    ---TACTATGGTATTATATATAGAATAGTTGAATCGGGAAAAGATAAAATAGAGATATATGGCCTACT-----CATATCTTAGGTTTC----GAA
Focuc_021    ---TACTATGGTATTATATATAGAATAGTTGAATCGGGAAAAGATAAAATAGAGATATATGGCCTACT-----CATATCTTAGGTTTC----GAA
Focuc_030    ---TACTATGGTATTATATATAGAATAGTTGAATCGGGAAAAGATAAAATAGAGATATATGGCCTACT-----CATATCTTAGGTTTC----GAA
Foniv_002    ---TACTATGGTATTATATATAGAATAGTTGAATCGGGAAAAGATAAAATAGAGATATATGGCCTACT-----CATATCTTAGGTTTC----GAA
Foniv_005    ---TACTATGGTATTATATATAGAATAGTTGAATCGGGAAAAGATAAAATAGAGATATATGGCCTACT-----CATATCTTAGGTTTC----GAA
Foniv_015    ---TACTATGGTATTATATATAGAATAGTTGAATCGGGAAAAGATAAAATAGAGATATATGGCCTACT-----CATATCTTAGGTTTC----GAA
Foniv_019    ---TACTATGGTATTATATATAGAATAGTTGAATCGGGAAAAGATAAAATAGAGATATATGGCCTACT-----CATATCTTAGGTTTC----GAA
Foniv_021    ---TACTATGGTATTATATATAGAATAGTTGAATCGGGAAAAGATAAAATAGAGATATATGGCCTACT-----CATATCTTAGGTTTC----GAA
Foniv_010    ---ATACTATGGTATTATATATAGAATAGTTGAATCGGGAAAAGATAAAATAGAGATATATGGCCTACT-----CATATCTTAGGTTTC----GAA
Foniv_037    ---ATACTATGGTATTATATATAGAATAGTTGAATCGGGAAAAGATAAAATAGAGATATATGGCCTACT-----CATATCTTAGGTTTC----GAA
Fopis_HDV247 ---ATACTATGGTATTATATATAGAATAGTTGAATCGGGAAAAGATAAAATAGAGATATATGGCCTACT-----CATATCTTAGGTTTC----GAA
Focub_B2_1   ---ATACTACGGTATTATATATAGAATAGTTGAATCGGGAAAAGATAAAATAGAGATATATGGCCTACT-----CATATCTTAGGTTTC----GAA
Focub_I15   ---ATACTACGGTATTATATATAGAATAGTTGAATCGGGAAAAGATAAAATAGAGATATATGGCCTACT-----CATATCTTAGGTTTC----GAA
Focub_N2     -----
```

























Fobul\_G14 TCAGGTGATTCGGAATTACTTTTGTCAACGAACTCAAGACCCCTCAAGGGTGGTTTGAACGCTACAGAGTTAACTCAAGCACT  
 Folyc\_002 TCAGGTGATTCGGAATTACTTTTGTCAACGAACTCAAGACCCCTCAAGGGTGGTTTGAAC  
 Folyc\_014 TCAGGTGATTCGGAATTACTTTTGTCAACGAACTCAAGACCCCTCAAGGGTGGTTTGAAC  
 Folyc\_016 TCAGGTGATTCGGAATTACTTTTGTCAACGAACTCAAGACCCCTCAAGGGTGGTTTGAAC  
 Folyc\_018 TCAGGTGATTCGGAATTACTTTTGTCAACGAACTCAAGACCCCTCAAGGGTGGTTTGAAC  
 Folyc\_038 TCAGGTGATTCGGAATTACTTTTGTCAACGAACTCAAGACCCCTCAAGGGTGGTTTGAAC  
 Folyc\_072 TCAGGTGATTCGGAATTACTTTTGTCAACGAACTCAAGACCCCTCAAGGGTGGTTTGAAC  
 Folyc\_4287\_0 TCAGGTGATTCGGAATTACTTTTGTCAACGAACTCAAGACCCCTCAAGGGTGGTTTGAAC  
 Folyc\_004 TCAGGTGATTCGGAATTACTTTTGTCAACGAACTCAAGACCCCTCAAGGGTGGTTTGAAC  
 Folyc\_026 TCAGGTGATTCGGAATTACTTTTGTCAACGAACTCAAGACCCCTCAAGGGTGGTTTGAAC  
 Folyc\_029 TCAGGTGATTCGGAATTACTTTTGTCAACGAACTCAAGACCCCTCAAGGGTGGTTTGAAC  
 Folyc\_069 TCAGGTGATTCGGAATTACTTTTGTCAACGAACTCAAGACCCCTCAAGGGTGGTTTGAAC  
 Folyc\_073 TCAGGTGATTCGGAATTACTTTTGTCAACGAACTCAAGACCCCTCAAGGGTGGTTTGAAC  
 Folyc\_074 TCAGGTGATTCGGAATTACTTTTGTCAACGAACTCAAGACCCCTCAAGGGTGGTTTGAAC  
 Folyc\_4287\_1 TCAGGTGATTCGGAATTACTTTTGTCAACGAACTCAAGACCCCTCAAGGGTGGTTTGAAC  
 Folyc\_MN25 TCAGGTGATTCGGAATTACTTTTGTCAACGAACTCAAGACCCCTCAAGGGTGGTTTGAAC  
 Fophy\_KOD886 TCAGGTGATTCGGAATTACTTTTGTCAACGAACTCAAGACCCCTCAAGGGTGGTTTGAAC  
 Fophy\_KOD887 TCAGGTGATTCGGAATTACTTTTGTCAACGAACTCAAGACCCCTCAAGGGTGGTTTGAAC  
 Fophy\_KOD888 TCAGGTGATTCGGAATTACTTTTGTCAACGAACTCAAGACCCCTCAAGGGTGGTTTGAAC  
 Focub\_B2\_0 TCAGGTGATTCGGAATTACTTTTGTCAACGAACTCAAGACCCCTCAAGGGTGGTTTGAAC  
 Fomel\_001 TCAGGTGATTCGGAATTACTTTTGTCAACGAACTCAAGACCCCTCAAGGGTGGTTTGAAC  
 Foniv\_013 TCAGGTGATTCGGAATTACTTTTGTCAACGAACTCAAGACCCCTCAAGGGTGGTTTGAAC  
 Fovas\_NRR125433 TCAGGTGATTCGGAATTACTTTTGTCAACGAACTCAAGACCCCTCAAGGGTGGTTTGAAC  
 Foniv\_020 TCAGGTGATTCGGAATTACTTTTGTCAACGAACTCAAGACCCCTCAAGGGTGGTTTGAAC  
 Folag\_001 TCAGGTGATTCGGAATTACTTTTGTCAACGAACTCAAGACCCCTCAAGGGTGGTTTGAAC  
 Folag\_005 TCAGGTGATTCGGAATTACTTTTGTCAACGAACTCAAGACCCCTCAAGGGTGGTTTGAAC  
 Focuc\_015 TCAGGTGATTCGGAATTACTTTTGTCAACGAACTCAAGACCCCTCAAGGGTGGTTTGAAC  
 Focuc\_037 TCAGGTGATTCGGAATTACTTTTGTCAACGAACTCAAGACCCCTCAAGGGTGGTTTGAAC  
 Fomom\_004 TCAGGTGATTCGGAATTACTTTTGTCAACGAACTCAAGACCCCTCAAGGGTGGTTTGAAC  
 Folil\_39 TCAGGTGATTCGGAATTACTTTTGTCAACGAACTCAAGACCCCTCAAGGGTGGTTTGAAC  
 Forcu\_016 TCAGGTGATTCGGAATTACTTTTGTCAACGAACTCAAGACCCCTCAAGGGTGGTTTGAAC  
 Forcu\_024 TCAGGTGATTCGGAATTACTTTTGTCAACGAACTCAAGACCCCTCAAGGGTGGTTTGAAC  
 Forcu\_031 TCAGGTGATTCGGAATTACTTTTGTCAACGAACTCAAGACCCCTCAAGGGTGGTTTGAAC  
 Fomln\_001 TCAGGTGATTCGGAATTACTTTTGTCAACGAACTCAAGACCCCTCAAGGGTGGTTTGAAC  
 Fomln\_004 TCAGGTGATTCGGAATTACTTTTGTCAACGAACTCAAGACCCCTCAAGGGTGGTTTGAAC  
 Fomln\_006 TCAGGTGATTCGGAATTACTTTTGTCAACGAACTCAAGACCCCTCAAGGGTGGTTTGAAC  
 Fomln\_012 TCAGGTGATTCGGAATTACTTTTGTCAACGAACTCAAGACCCCTCAAGGGTGGTTTGAAC  
 Fomln\_016 TCAGGTGATTCGGAATTACTTTTGTCAACGAACTCAAGACCCCTCAAGGGTGGTTTGAAC  
 Fomln\_005 TCAGGTGATTCGGAATTACTTTTGTCAACGAACTCAAGACCCCTCAAGGGTGGTTTGAAC  
 Fomln\_009 TCAGGTGATTCGGAATTACTTTTGTCAACGAACTCAAGACCCCTCAAGGGTGGTTTGAAC  
 Fomln\_010 TCAGGTGATTCGGAATTACTTTTGTCAACGAACTCAAGACCCCTCAAGGGTGGTTTGAAC  
 Fomln\_011 TCAGGTGATTCGGAATTACTTTTGTCAACGAACTCAAGACCCCTCAAGGGTGGTTTGAAC  
 Fomln\_013 TCAGGTGATTCGGAATTACTTTTGTCAACGAACTCAAGACCCCTCAAGGGTGGTTTGAAC  
 Focuc\_018 TCAGGTGATTCGGAATTACTTTTGTCAACGAACTCAAGACCCCTCAAGGGTGGTTTGAAC  
 Focuc\_021 TCAGGTGATTCGGAATTACTTTTGTCAACGAACTCAAGACCCCTCAAGGGTGGTTTGAAC  
 Focuc\_030 TCAGGTGATTCGGAATTACTTTTGTCAACGAACTCAAGACCCCTCAAGGGTGGTTTGAAC  
 Foniv\_002 TCAGGTGATTCGGAATTACTTTTGTCAACGAACTCAAGACCCCTCAAGGGTGGTTTGAAC  
 Foniv\_005 TCAGGTGATTCGGAATTACTTTTGTCAACGAACTCAAGACCCCTCAAGGGTGGTTTGAAC  
 Foniv\_015 TCAGGTGATTCGGAATTACTTTTGTCAACGAACTCAAGACCCCTCAAGGGTGGTTTGAAC  
 Foniv\_019 TCAGGTGATTCGGAATTACTTTTGTCAACGAACTCAAGACCCCTCAAGGGTGGTTTGAAC  
 Foniv\_021 TCAGGTGATTCGGAATTACTTTTGTCAACGAACTCAAGACCCCTCAAGGGTGGTTTGAAC  
 Foniv\_010 TCAGGTGATTCGGAATTACTTTTGTCAACGAACTCAAGACCCCTCAAGGGTGGTTTGAAC  
 Foniv\_037 TCAGGTGATTCGGAATTACTTTTGTCAACGAACTCAAGACCCCTCAAGGGTGGTTTGAAC  
 Fopis\_HDV247 TCAGGTGATTCGGAATTACTTTTGTCAACGAACTCAAGACCCCTCAAGGGTGGTTTGAAC  
 Focub\_B2\_1 TCA---GATTCGGAATTACTTTTGTCAACGAACTCAAGACCCCTCAAGGGTGGTTTGAACGC  
 Focub\_I15 TCA---GATTCGGAATTACTTTTGTCAACGAACTCAAGACCCCTCAAGGGTGGTTTGAACGC  
 Focub\_N2 TCA---GATTCGGAATTACTTTTGTCAACGAACTCAAGACCCCTCAAGGGTGGTTTGAACGCT

















Forcu\_016\_1 TCTATTCTTAATTGTT-----GTGTACCCCTGATTGTCGGTACCCCGGT-----  
 Forcu\_024\_1 TCTATTCTTAATTGTT-----GTGTACCCCTGATTGTCGGTACCCCGGT-----  
 Forcu\_031\_1 TCTATTCTTAATTGTT-----GTGTACCCCTGATTGTCGGTACCCCGGT-----  
 Fonic\_012 TCTTGCTCCAGAAATCAAGCTGGTGTGCCCTTGCCAATCCCTCCGCCTAAAATTGTG-  
 Fogla\_G76 TCTTGCTCCAGAAATCAAGCTGGTGTGCCCTTGCCAATCCCTCCGCCTAAAATTGTG-  
 Folil\_39 TCTTGCTCCAGAAATCAAGCTGGTGTGCCCTTGCCAATCCCTCCGCCTAAAATTGTG-  
 Folyc\_073 TCTTGCTCCAGAAATCAAGCTGGTGTGCCCTTGCCAATCCCTCCGCCTAAAATTGTG-  
 Folyc\_002 TCTTGCTCCAGAAATCAAGCTGGTGTGCCCTTGCCAATCCCTCCGCCTAAAATTGTG-  
 Folyc\_004 TCTTGCTCCAGAAATCAAGCTGGTGTGCCCTTGCCAATCCCTCCGCCTAAAATTGTG-  
 Folyc\_018 TCTTGCTCCAGAAATCAAGCTGGTGTGCCCTTGCCAATCCCTCCGCCTAAAATTGTG-  
 Folyc\_038 TCTTGCTCCAGAAATCAAGCTGGTGTGCCCTTGCCAATCCCTCCGCCTAAAATTGTG-  
 Folyc\_074 TCTTGCTCCAGAAATCAAGCTGGTGTGCCCTTGCCAATCCCTCCGCCTAAAATTGTG-  
 Fophy\_KOD886 TCTTGCTCCAGAAATCAAGCTGGTGTGCCCTTGCCAATCCCTCCGCCTAAAATTGTG-  
 Fophy\_KOD887 TCTTGCTCCAGAAATCAAGCTGGTGTGCCCTTGCCAATCCCTCCGCCTAAAATTGTG-  
 Folyc\_007 TCTTGCTCCAGAAATCAAGCTGGTGTGCCCTTGCCAATCCCTCCGCCTAAAATTGTG-  
 Folyc\_014 TCTTGCTCCAGAAATCAAGCTGGTGTGCCCTTGCCAATCCCTCCGCCTAAAATTGTG-  
 Folyc\_026 TCTTGCTCCAGAAATCAAGCTGGTGTGCCCTTGCCAATCCCTCCGCCTAAAATTGTG-  
 Folyc\_029 TCTTGCTCCAGAAATCAAGCTGGTGTGCCCTTGCCAATCCCTCCGCCTAAAATTGTG-  
 Folyc\_4287 TCTTGCTCCAGAAATCAAGCTGGTGTGCCCTTGCCAATCCCTCCGCCTAAAATTGTG-  
 Fophy\_KOD888 TCTTGCTCCAGAAATCAAGCTGGTGTGCCCTTGCCAATCCCTCCGCCTAAAATTGTG-  
 Fomln\_001 TCTTGCTCCAGAAATCAAGCTGGTGTGCCCTTGCTAATCCCTCCACCTAAAATTGTG-  
 Fotul\_Tu58 TCTTGCTCCAGAAATCAAGCTGGTGTGCCCTTGCTA-----CCTAAAATTGTGACAGGGGTTA-  
 Fo47 TCTTGCTCCAGAAATCAAGCTGGTGTGCCCTTGCCAATCCCTCCGCCTAAAATTGTG-  
 Fo\_MN14 TCTTGCTCCAGAAATCAAGCTGGTGTGCCCTTGCCAATCCCTCCGCCTAAAATTGTG-  
 Fotul\_Tu67 TCTTGCTCCAGAAATCAAGCTGGTGTGCCCTTGCCAATCCCTCCGCCTAAAATTGTG-  
 Fogla\_G2 TCTTGCTCCAGAAATCAAGCTGGTGTGCCCTTGCCAATCCCTCCGCCTAAAATTGTG-  
 Folyc\_016 TCTTGCTCCAGAAATCAAGCTGGTGTGCCCTTGCCAATCCCTCCGCCTAAAATTGTG-  
 Fonic\_001 TCTTGCTCCAGAAATCAAGCTGGTGTGCCCTTGCCAATCCCTCCGCCTAAAATTGTG-  
 Fonic\_003 TCTTGCTCCAGAAATCAAGCTGGTGTGCCCTTGCCAATCCCTCCGCCTAAAATTGTG-  
 Forcly\_CL57 TCTTGCTCCAGAAATCAAGCTGGTGTGCCCTTGCCAATCCCTCCGCCTAAAATTGTG-  
 Fonar\_Na5 TCTTGCTCCAGAAATCAAGCTGGTGTGCCCTTGCCAATCCCTCCGCCTAAAATTGTG-  
 Folyc\_072 TCTTGCTCCAGAAATCAAGCTGGTGTGCCCTTGCCAATCCCTCCGCCTAAAATTGTG-  
 Folyc\_075 TCTTGCTCCAGAAATCAAGCTGGTGTGCCCTTGCCAATCCCTCCGCCTAAAATTGTG-  
 Fonic\_010 TCTTGCTCCAGAAATCAAGCTGGTGTGCCCTTGCCAATCCCTCCGCCTAAAATTGTG-  
 Folyc\_069 TCTTGCTCCAGAAATCAAGCTGGTGTGCCCTTGCCAATCCCTCCGCCTAAAATTGTG-  
 Forcu\_016\_0 TCTTGCTCCAGAAATCAAGCTGGTGTGCCCTTGCCAATCCCTCCGCCTAAAATTGTG-  
 Forcu\_024\_0 TCTTGCTCCAGAAATCAAGCTGGTGTGCCCTTGCCAATCCCTCCGCCTAAAATTGTG-  
 Forcu\_031\_0 TCTTGCTCCAGAAATCAAGCTGGTGTGCCCTTGCCAATCCCTCCGCCTAAAATTGTG-  
 Folyc\_MN25 TCTTGCTCCAGAAATCAAGCTGGTGTGCCCTTGCCAATCCCTCCCTCTAAAATTGTG-  
 Focuc\_001 TCTTGCTCCAGAAATCAAGCTGGTGTGCCCTTGCCAATCCCTCCGCCTAAAATTGTG-  
 Focuc\_035 TCTTGCTCCAGAAATCAAGCTGGTGTGCCCTTGCCAATCCCTCCGCCTAAAATTGTG-  
 Focuc\_037 TCTTGCTCCAGAAATCAAGCTGGTGTGCCCTTGCCAATCCCTCCGCCTAAAATTGTG-  
 Fomom\_001 TCTTGCTCCAGAAATCAAGCTGGTGTGCCCTTGCCAATCCCTCCGCCTAAAATTGTG-  
 Fomom\_004 TCTTGCTCCAGAAATCAAGCTGGTGTGCCCTTGCCAATCCCTCCGCCTAAAATTGTG-  
 Foniv\_010 TCTTGCTCCAGAAATCAAGCTGGTGTGCCCTTGCCAATCCCTCCGCCTAAAATTGTG-  
 Foniv\_013 TCTTGCTCCAGAAATCAAGCTGGTGTGCCCTTGCCAATCCCTCCGCCTAAAATTGTG-  
 Foniv\_021 TCTTGCTCCAGAAATCAAGCTGGTGTGCCCTTGCCAATCCCTCCGCCTAAAATTGTG-  
 Fovas\_NRR125433 TCTTGCTCCAGAAATCAAGCTGGTGTGCCCTTGCCAATCCCTCCGCCTAAAATTGTG-  
 Focuc\_015 TCTTGCTCCAGAAATCAAGCTGGTGTGCCCTTGCCAATCCCTCCGCCTAAAATTGTG-  
 Folag\_001 TCTTGCTCCAGAAATCAAGCTGGTGTGCCCTTGCCAATCCCTCCGCCTAAAATTGTG-  
 Folag\_002 TCTTGCTCCAGAAATCAAGCTGGTGTGCCCTTGCCAATCCCTCCGCCTAAAATTGTG-  
 Folag\_005 TCTTGCTCCAGAAATCAAGCTGGTGTGCCCTTGCCAATCCCTCCGCCTAAAATTGTG-  
 Foniv\_005 TCTTGCTCCAGAAATCAAGCTGGTGTGCCCTTGCCAATCCCTCCGCCTAAAATTGTG-  
 Foniv\_020 TCTTGCTCCAGAAATCAAGCTGGTGTGCCCTTGCCAATCCCTCCGCCTAAAATTGTG-  
 Fomel\_001 TCTTGCTCCAGAAATCAAGCTGGTGTGCCCTTGCCAATCCCTCCGCCTAAAATTGTG-  
 Fomln\_011 TCTTGCTCCAGAAATCAAGCTGGTGTGCCCTTGCCAATCCCTCCGCCTAAAATTGTG-  
 Foniv\_002 TCTTGCTCCAGAAATCAAGCTGGTGTGCCCTTGCCAATCCCTCCGCCTAAAATTGTG-  
 Foniv\_037 TCTTGCTCCAGAAATCAAGCTGGTGTGCCCTTGCCAATCCCTCCGCCTAAAATTGTG-  
 Fomln\_009 TCTTGCTCCAGAAATCAAGCTGGTGTGCCCTTGCCAATCCCTCCGCCTAAAATTGTG-  
 Fomln\_010 TCTTGCTCCAGAAATCAAGCTGGTGTGCCCTTGCCAATCCCTCCGCCTAAAATTGTG-  
 Fopis\_HDV247 TCTTGCTCCAGAAATCAAGCTGGTGTGCCCTTGCCAATCCCTCCGCCTAAAATTGTG-  
 Forap\_PHW815 TCTTGCTCCAGAAATCAAGCTGGTGTGCCCTTGCCAATCCCTCCGCCTAAAATTGTG-  
 Focuc\_018 TCTTGCTCCAGAAATCAAGCTGGTGTGCCCTTGCCAATCCCTCCGCCTAAAATTGTG-  
 Focuc\_021 TCTTGCTCCAGAAATCAAGCTGGTGTGCCCTTGCCAATCCCTCCGCCTAAAATTGTG-  
 Focuc\_030 TCTTGCTCCAGAAATCAAGCTGGTGTGCCCTTGCCAATCCCTCCGCCTAAAATTGTG-  
 Foniv\_015 TCTTGCTCCAGAAATCAAGCTGGTGTGCCCTTGCTAATCCCTCCACCTAAAATTGTG-  
 Foniv\_019 TCTTGCTCCAGAAATCAAGCTGGTGTGCCCTTGCTAATCCCTCCACCTAAAATTGTG-  
 Fomln\_004 TCTTGCTCCAGAAATCAAGCTGGTGTGCCCTTGCTAATCCCTCCACCTAAAATTGTG-  
 Fomln\_006 TCTTGCTCCAGAAATCAAGCTGGTGTGCCCTTGCTAATCCCTCCACCTAAAATTGTG-  
 Fomln\_012 TCTTGCTCCAGAAATCAAGCTGGTGTGCCCTTGCTAATCCCTCCACCTAAAATTGTG-  
 Fomln\_016 TCTTGCTCCAGAAATCAAGCTGGTGTGCCCTTGCTAATCCCTCCACCTAAAATTGTG-  
 Fomln\_005 TCTTGCTCCAGAAATCAAGCTGGTGTGCCCTTGCTAATCCCTCCACCTAAAATTGTG-  
 Fomln\_013 TCTTGCTCCAGAAATCAAGCTGGTGTGCCCTTGCTAATCCCTCCACCTAAAATTGTG-  
 Focub\_B2 TCTTGCTCCAGAAATCAAGCTGGTGTGCCCTTGCTAATCCCTCCACCTAAAATTGTGACAGGGGTTATTAGTCTGTTGGTCTCTGTTATGTTGG-  
 Focub\_II5 TCTTGCTCCAGAAATCAAGCTGGTGTGCCCTTGCTAATCCCTCCACCTAAAATTGTGACAGGGGTTATTAGTCTGTTGGTCTCTGTTATGTTGG-  
 Focuc\_011 TCTTGCTCCAGAAATCAAGCTGGTGTGCCCTTGCTAATCCCTCCACCTAAAATTGTGACAGGGGTTATTAGTCTGTTGGTCTCTGTTATGTTGG-  
 Focuc\_013 TCTTGCTCCAGAAATCAAGCTGGTGTGCCCTTGCTAATCCCTCCACCTAAAATTGTGACAGGGGTTATTAGTCTGTTGGTCTCTGTTATGTTGG-  
 Fobul\_G14 TCTTGCTCCAGAAATCAAGCTGGTGTGCCCTTGCTAATCCCTCCACCTAAAATTGTG-  
 Focon\_5176 TCTTGCTCCAGAAATCAAGCTGGTGTGCCCTTGCTAATCCCTCCACCTAAAATTGTG-  
 Focon\_PHW808 TCTTGCTCCAGAAATCAAGCTGGTGTGCCCTTGCTAATCCCTCCACCTAAAATTGTG-  
 Focub\_N2 TCTTGCTCCAGAAATCAAGCTGGTGTGCCCTTGCTAATCCCTCCACCTAAAATTGTG-  
 Folag\_004 TCTTGCTCCAGAAATCAAGCTGGTGTGCCCTTGCTAATCCCTCCACCTAAAATTGTG-  
 Foluf\_002 TCTTGCTCCAGAAATCAAGCTGGTGTGCCCTTGCTAATCCCTCCACCTAAAATTGTG-  
 Foluf\_001 TCTTGCTCCAGAAATCAAGCTGGTGTGCCCTTGCTAATCCCTCCACCTAAAATTGTG-



```
1  
Fotul_Tu67 -----TAAGCAGAGGGAATAATATTTAAATCCAATTATC-----TCATCTCCTCTGTTGTTTCTTTTCTCT-----AACTACTTCAG  
Fobul_G14 -----GGGAGAGAATACITTGAAATATAAATAAATACTCTTTCTCCTGCTGTTTATCATCTTC-----TTTGAACTACTTCAG  
Fogla_G2 -----GGGAGAGAATACITTGAAATATAAATAAATACTCTTTCTCCTGCTGTTTATCATCTTC-----TTTGAACTACTTCAG  
Fogla_G76 -----GGGAGAGAATACITTGAAATATAAATAAATACTCTTTCTCCTGCTGTTTATCATCTTC-----TTTGAACTACTTCAG  
Folag_001 -----  
Foniv_010_1 -----GAATACITTTAAATATAAATA-----CGGTCGCTCTGCTATTTCTTTCTCT-----AACTACTTCAC  
Foniv_019_1 -----GAATACITTTAAATATAAATA-----CGGTCGCTCTGCTATTTCTTTCTCT-----AACTACTTCAC  
Foniv_021_1 -----GAATACITTTAAATATAAATA-----CGGTCGCTCTGCTATTTCTTTCTCT-----AACTACTTCAC  
Foniv_037_1 -----GAATACITTTAAATATAAATA-----CGGTCGCTCTGCTATTTCTTTCTCT-----AACTACTTCAC  
Fomom_001 -----AGAATACITTTAAATATAAATA-----CGGTCGCTCTGCTATTTCTTTCTCT-----AACTACTTCAC  
Fomom_004 -----AGAATACITTTAAATATAAATA-----CGGTCGCTCTGCTATTTCTTTCTCT-----AACTACTTCAC  
Foniv_002_1 -----AGAATACITTTAAATATAAATA-----CGGTCGCTCTGCTATTTCTTTCTCT-----AACTACTTCAC  
Foniv_015_1 -----AGAATACITTTAAATATAAATA-----CGGTCGCTCTGCTATTTCTTTCTCT-----AACTACTTCAC  
Foniv_020_1 -----CTCTGCTATTTCTTTCTCT-----AACTACTTCAC  
Fomln_004 -----ATAGAATACITTTAAATATAAATA-----CGGTCGCTCTGCTATTTCTTTCTCT-----AACTACTTCAC  
Fomln_013 -----ATAGAATACITTTAAATATAAATA-----CGGTCGCTCTGCTATTTCTTTCTCT-----AACTACTTCAC  
Fomln_005 -----GATAGAATACITTTAAATATAAATA-----CGGTCGCTCTGCTATTTCTTTCTCT-----AACTACTTCAC  
Fomln_006 -----GATAGAATACITTTAAATATAAATA-----CGGTCGCTCTGCTATTTCTTTCTCT-----AACTACTTCAC  
Fomln_012 -----GATAGAATACITTTAAATATAAATA-----CGGTCGCTCTGCTATTTCTTTCTCT-----AACTACTTCAC  
Fomln_016 -----GATAGAATACITTTAAATATAAATA-----CGGTCGCTCTGCTATTTCTTTCTCT-----AACTACTTCAC  
Forcu_016 -----GATAGAATACITTTAAATATAAATA-----CGGTCGCTCTGCTATTTCTTTCTCT-----AACTACTTCAC  
Forcu_024 -----GATAGAATACITTTAAATATAAATA-----CGGTCGCTCTGCTATTTCTTTCTCT-----AACTACTTCAC  
Forcu_031 -----GATAGAATACITTTAAATATAAATA-----CGGTCGCTCTGCTATTTCTTTCTCT-----AACTACTTCAC  
Foniv_005_1 -----ATAGAATACITTTAAATATAAATA-----CGGTCGCTCTGCTATTTCTTTCTCT-----AACTACTTCAC  
Foluf_001_1 -----NNNNNNNNCTGCTATTTCTTTCTCT-----AACTACTTCAC  
Foniv_013_1 -----CTCTGCTATTTCTTTCTCT-----AACTACTTCAC  
Forap_PHW815 -----AACAGGGGGGAACATATAAGTATAG-----CCATCTCCTTGGCTCTTATTTCTCACTTCACTTGACTTCACCTTCAC  
Focuc_018 -----GGGGGAAAAACATATAAGTATAG-----CCATCTCCTTGGCTCTTATTTCTCACTTCACTTGACTTCACCTTCAC  
Focuc_021 -----GGGGGAAAAACATATAAGTATAG-----CCATCTCCTTGGCTCTTATTTCTCACTTCACTTGACTTCACCTTCAC  
Focuc_030 -----AGGGGGAAAAACATATAAGTATAG-----CCATCTCCTTGGCTCTTATTTCTCACTTCACTTGACTTCACCTTCAC  
Focuc_037 -----GGGGGAAAAACATATAAGTATAG-----CCATCTCCTTGGCTCTTATTTCTCACTTCACTTGACTTCACCTTCAC  
Focuc_001 -----GGGGGAAAAACATATAAGTATAG-----CCATCTCCTTGGCTCTTATTTCTCACTTCACTTGACTTCACCTTCAC  
Focuc_013 -----GGGGGAAAAACATATAAGTATAG-----CCATCTCCTTGGCTCTTATTTCTCACTTCACTTGACTTCACCTTCAC  
Focuc_011 -----AGGGGAAAAACATATAAGTATAG-----CCATCTCCTTGGCTCTTATTTCTCACTTCACTTGACTTCACCTTCAC  
Focuc_015 -----AGGGGAAAAACATATAAGTATAG-----CCATCTCCTTGGCTCTTATTTCTCACTTCACTTGACTTCACCTTCAC  
Focuc_035 -----AGGGGAAAAACATATAAGTATAG-----CCATCTCCTTGGCTCTTATTTCTCACTTCACTTGACTTCACCTTCAC  
Foluf_001_0 GTAATATAAAGAACAGGGGAGAGAATAATTTAAATATAAATAATCT-----TTATCACTCTGCTTTCTCATTT-----CTTCAC  
Foluf_001_1 TAAATATAAAGAACAGGGGAGAGAATAATTTAAATATAAATAATCT-----TTATCACTCTGCTTTCTCATTT-----CTTCAC  
Fopis_HDV247 -----GAGAATATATAAATGAG-----CTGCCCTCTGCTCTGATTTCTC-----ACTTCAC  
Fomln_010 -----CGAGTATATATAAATGAG-----CTGCCCTCTGCTCTGATTTCTC-----ACTTCAC  
Foniv_002_0 -----CGAGTATATATAAATGAG-----CTGCCCTCTGCTCTGATTTCTC-----ACTTCAC  
Foniv_015_0 -----CGAGTATATATAAATGAG-----CTGCCCTCTGCTCTGATTTCTC-----ACTTCAC  
Foniv_021_0 -----CGAGTATATATAAATGAG-----CTGCCCTCTGCTCTGATTTCTC-----ACTTCAC  
Foniv_005_0 -----GAGTATATATAAATGAG-----CTGCCCTCTGCTCTGATTTCTC-----ACTTCAC  
Foniv_010_0 -----GAGTATATATAAATGAG-----CTGCCCTCTGCTCTGATTTCTC-----ACTTCAC  
Foniv_013_0 -----GAGTATATATAAATGAG-----CTGCCCTCTGCTCTGATTTCTC-----ACTTCAC  
Foniv_019_0 -----GAGTATATATAAATGAG-----CTGCCCTCTGCTCTGATTTCTC-----ACTTCAC  
Foniv_020_0 -----GAGTATATATAAATGAG-----CTGCCCTCTGCTCTGATTTCTC-----ACTTCAC  
Foniv_037_0 -----GAGTATATATAAATGAG-----CTGCCCTCTGCTCTGATTTCTC-----ACTTCAC
```

```
101  
Fotul_Tu67 TTTTCAAGACATTTCCATCTCTTTGCTCACAACTCTCTTTACTACCTAAGACGCTCTCAT-----AGTC-----CAAAACCGTCAACATG  
Fobul_G14 TTGATCAAGACATTTCCATCTCTTTGCTCACAACTCTCTTTACTACCTAAGACGCTCTCAT-----AGTC-----CAAAACCGTCAACATG  
Fogla_G2 TTGATCAAGACATTTCCATCTCTTTGCTCACAACTCTCTTTACTACCTAAGACGCTCTCAT-----AGTC-----CAAAACCGTCAACATG  
Fogla_G76 TTGATCAAGACATTTCCATCTCTTTGCTCACAACTCTCTTTACTACCTAAGACGCTCTCAT-----AGTC-----CAAAACCGTCAACATG  
Folag_001 -----CAAACCAAAACCGTCAACATG  
Foniv_010_1 TTTTAAACAAGATATTTCCATCTCTTTGCTCACAACTCTCTTTACTACCTAAGACGCTCTCAC-----AGTCCAAAACCGTCAACAAACCGTCAACATG  
Foniv_019_1 TTTTAAACAAGATATTTCCATCTCTTTGCTCACAACTCTCTTTACTACCTAAGACGCTCTCAC-----AGTCCAAAACCGTCAACAAACCGTCAACATG  
Foniv_021_1 TTTTAAACAAGATATTTCCATCTCTTTGCTCACAACTCTCTTTACTACCTAAGACGCTCTCAC-----AGTCCAAAACCGTCAACAAACCGTCAACATG  
Foniv_037_1 TTTTAAACAAGATATTTCCATCTCTTTGCTCACAACTCTCTTTACTACCTAAGACGCTCTCAC-----AGTCCAAAACCGTCAACAAACCGTCAACATG  
Fomom_001 TTTTAAACAAGATATTTCCATCTCTTTGCTCACAACTCTCTTTACTACCTAAGACGCTCTCAC-----AGTCCAAAACCGTCAACAAACCGTCAACATG  
Fomom_004 TTTTAAACAAGATATTTCCATCTCTTTGCTCACAACTCTCTTTACTACCTAAGACGCTCTCAC-----AGTCCAAAACCGTCAACAAACCGTCAACATG  
Foniv_002_1 TTTTAAACAAGATATTTCCATCTCTTTGCTCACAACTCTCTTTACTACCTAAGACGCTCTCAC-----AGTCCAAAACCGTCAACAAACCGTCAACATG  
Foniv_015_1 TTTTAAACAAGATATTTCCATCTCTTTGCTCACAACTCTCTTTACTACCTAAGACGCTCTCAC-----AGTCCAAAACCGTCAACAAACCGTCAACATG  
Foniv_020_1 TTTTAAACAAGATATTTCCATCTCTTTGCTCACAACTCTCTTTACTACCTAAGACGCTCTCAC-----AGTCCAAAACCGTCAACAAACCGTCAACATG  
Fomln_004 TTTTAAACAAGATATTTCCATCTCTTTGCTCACAACTCTCTTTACTACCTAAGACGCTCTCAC-----AGTCCAAAACCGTCAACAAACCGTCAACATG  
Fomln_013 TTTTAAACAAGATATTTCCATCTCTTTGCTCACAACTCTCTTTACTACCTAAGACGCTCTCAC-----AGTCCAAAACCGTCAACAAACCGTCAACATG  
Fomln_005 TTTTAAACAAGATATTTCCATCTCTTTGCTCACAACTCTCTTTACTACCTAAGACGCTCTCAC-----AGTCCAAAACCGTCAACAAACCGTCAACATG  
Fomln_006 TTTTAAACAAGATATTTCCATCTCTTTGCTCACAACTCTCTTTACTACCTAAGACGCTCTCAC-----AGTCCAAAACCGTCAACAAACCGTCAACATG  
Fomln_012 TTTTAAACAAGATATTTCCATCTCTTTGCTCACAACTCTCTTTACTACCTAAGACGCTCTCAC-----AGTCCAAAACCGTCAACAAACCGTCAACATG  
Fomln_016 TTTTAAACAAGATATTTCCATCTCTTTGCTCACAACTCTCTTTACTACCTAAGACGCTCTCAC-----AGTCCAAAACCGTCAACAAACCGTCAACATG  
Forcu_016 TTTTAAACAAGATATTTCCATCTCTTTGCTCACAACTCTCTTTACTACCTAAGACGCTCTCAC-----AGTCCAAAACCGTCAACAAACCGTCAACATG  
Forcu_024 TTTTAAACAAGATATTTCCATCTCTTTGCTCACAACTCTCTTTACTACCTAAGACGCTCTCAC-----AGTCCAAAACCGTCAACAAACCGTCAACATG  
Forcu_031 TTTTAAACAAGATATTTCCATCTCTTTGCTCACAACTCTCTTTACTACCTAAGACGCTCTCAC-----AGTCCAAAACCGTCAACAAACCGTCAACATG  
Foniv_005_1 TTTTAAACAAGATATTTCCATCTCTTTGCTCACAACTCTCTTTACTACCTAAGACGCTCTCAC-----AGTCCAAAACCGTCAACAAACCGTCAACATG  
Foluf_001_1 TTTTAAACAAGATATTTCCATCTCTTTGCTCACAACTCTCTTTACTACCTAAGACGCTCTCAC-----AGTCCAAAACCGTCAACAAACCGTCAACATG  
Foniv_013_1 TTTTAAACAAGATATTTCCATCTCTTTGCTCACAACTCTCTTTACTACCTAAGACGCTCTCAC-----AGTCCAAAACCGTCAACAAACCGTCAACATG  
Forap_PHW815 TTTTAAACAAGATATTTCCATCTCTTTGCTCACAACTCTCTTTACTACCTAAGACGCTCTCAC-----AGTCCAAAACCGTCAACAAACCGTCAACATG  
Focuc_018 TTTCATTGGAACATTTGATCTCTCTCTCTTTATACTCCCATTGCCGCTAAGCCATTTTAC-----AATC-----CAAACCACACAGATG  
Focuc_021 TTTCATTGGAACATTTGATCTCTCTCTCTTTATACTCCCATTGCCGCTAAGCCATTTTAC-----AATC-----CAAACCACACAGATG  
Focuc_030 TTTCATTGGAACATTTGATCTCTCTCTCTTTATACTCCCATTGCCGCTAAGCCATTTTAC-----AATC-----CAAACCACACAGATG  
Focuc_037 TTTCATTGGAACATTTGATCTCTCTCTCTTTATACTCCCATTGCCGCTAAGCCATTTTAC-----AATC-----CAAACCACACAGATG  
Focuc_001 TTTCATTGGAACATTTGATCTCTCTCTCTTTATACTCCCATTGCCGCTAAGCCATTTTAC-----AATC-----CAAACCACACAGATG  
Focuc_013 TTTCATTGGAACATTTGATCTCTCTCTCTTTATACTCCCATTGCCGCTAAGCCATTTTAC-----AATC-----CAAACCACACAGATG  
Focuc_011 TTTCATTGGAACATTTGATCTCTCTCTCTTTATACTCCCATTGCCGCTAAGCCATTTTAC-----AATC-----CAAACCACACAGATG  
Focuc_015 TTTCATTGGAACATTTGATCTCTCTCTCTTTATACTCCCATTGCCGCTAAGCCATTTTAC-----AATC-----CAAACCACACAGATG  
Focuc_035 TTTCATTGGAACATTTGATCTCTCTCTCTTTATACTCCCATTGCCGCTAAGCCATTTTAC-----AATC-----CAAACCACACAGATG  
Foluf_001_0 TTTATCAAGACATTTCCATCTCTTTGCTCACAACTCTCTTTACTACCTAAGACGCTCTTC-----AGT-----TAAACCGTCAACATG  
Foluf_002 TTTATCAAGACATTTCCATCTCTTTGCTCACAACTCTCTTTACTACCTAAGACGCTCTTC-----AGT-----TAAACCGTCAACATG  
Fopis_HDV247 TTTATTGGAACATTTCCATCTCTCTCTCTCTTTATACTCCCATTGCCGCTAAGCCATTTTAC-----AATC-----CAAACCACACAGATG  
Fomln_010 TTTATTGGAACATTTCCATCTCTCTCTCTCTTTATACTCCCATTGCCGCTAAGCCATTTTAC-----AATC-----CAAACCACACAGATG  
Foniv_002_0 TTTATTGGAACATTTCCATCTCTCTCTCTCTTTATACTCCCATTGCCGCTAAGCCATTTTAC-----AATC-----CAAACCACACAGATG  
Foniv_015_0 TTTATTGGAACATTTCCATCTCTCTCTCTCTTTATACTCCCATTGCCGCTAAGCCATTTTAC-----AATC-----CAAACCACACAGATG  
Foniv_021_0 TTTATTGGAACATTTCCATCTCTCTCTCTCTTTATACTCCCATTGCCGCTAAGCCATTTTAC-----AATC-----CAAACCACACAGATG  
Foniv_005_0 TTTATTGGAACATTTCCATCTCTCTCTCTCTTTATACTCCCATTGCCGCTAAGCCATTTTAC-----AATC-----CAAACCACACAGATG  
Foniv_010_0 TTTATTGGAACATTTCCATCTCTCTCTCTCTTTATACTCCCATTGCCGCTAAGCCATTTTAC-----AATC-----CAAACCACACAGATG  
Foniv_013_0 TTTATTGGAACATTTCCATCTCTCTCTCTCTTTATACTCCCATTGCCGCTAAGCCATTTTAC-----AATC-----CAAACCACACAGATG  
Foniv_019_0 TTTATTGGAACATTTCCATCTCTCTCTCTCTTTATACTCCCATTGCCGCTAAGCCATTTTAC-----AATC-----CAAACCACACAGATG  
Foniv_020_0 TTTATTGGAACATTTCCATCTCTCTCTCTCTTTATACTCCCATTGCCGCTAAGCCATTTTAC-----AATC-----CAAACCACACAGATG  
Foniv_037_0 TTTATTGGAACATTTCCATCTCTCTCTCTCTTTATACTCCCATTGCCGCTAAGCCATTTTAC-----AATC-----CAAACCACACAGATG
```

201

Fotul\_Tu67
Fobul\_G14
Fogla\_G2
Fogla\_G76
Folag\_001
Foniv\_010\_1
Foniv\_019\_1
Foniv\_021\_1
Foniv\_037\_1
Fomom\_001
Fomom\_004
Foniv\_002\_1
Foniv\_015\_1
Foniv\_020\_1
Fomln\_004
Fomln\_013
Fomln\_005
Fomln\_006
Fomln\_012
Fomln\_016
Forcu\_016
Forcu\_024
Forcu\_031
Foniv\_005\_1
Foluf\_001\_1
Foniv\_013\_1
Forap\_PHW815
Focuc\_018
Focuc\_021
Focuc\_030
Focuc\_037
Focuc\_001
Focuc\_013
Focuc\_011
Focuc\_015
Focuc\_035
Foluf\_001\_0
Foluf\_002
Fopis\_HDV247
Fomln\_010
Foniv\_002\_0
Foniv\_015\_0
Foniv\_021\_0
Foniv\_005\_0
Foniv\_010\_0
Foniv\_013\_0
Foniv\_019\_0
Foniv\_020\_0
Foniv\_037\_0

Ip7307
fwd>
Focuc

301

Fotul\_Tu67
Fobul\_G14
Fogla\_G2
Fogla\_G76
Folag\_001
Foniv\_010\_1
Foniv\_019\_1
Foniv\_021\_1
Foniv\_037\_1
Fomom\_001
Fomom\_004
Foniv\_002\_1
Foniv\_015\_1
Foniv\_020\_1
Fomln\_004
Fomln\_013
Fomln\_005
Fomln\_006
Fomln\_012
Fomln\_016
Forcu\_016
Forcu\_024
Forcu\_031
Foniv\_005\_1
Foluf\_001\_1
Foniv\_013\_1
Forap\_PHW815
Focuc\_018
Focuc\_021
Focuc\_030
Focuc\_037
Focuc\_001
Focuc\_013
Focuc\_011
Focuc\_015
Focuc\_035
Foluf\_001\_0
Foluf\_002
Fopis\_HDV247
Fomln\_010
Foniv\_002\_0
Foniv\_015\_0
Foniv\_021\_0
Foniv\_005\_0
Foniv\_010\_0
Foniv\_013\_0
Foniv\_019\_0
Foniv\_020\_0
Foniv\_037\_0



601

Fotul\_Tu67 TCGATACCCTCAACCTATGATTATGCCAAGCAAGGCGGCTCTGGTGTCTATAACTAGT--GGTCTTGTGTTATTGGGGATTGAATTTTGACCCGTG--
Fobul\_G14 TCGATACCCTAAAGCTATGATTATGCCAAGCAAGGCGACTCTCGTTGTCTATAACTAGTGGCGGTGTTGTTAGTGGGGATTGAGCTTTGACCCCT---

tp7324
rev<
Focuc

701

Fotul\_Tu67 --GGGGGGGGGGGGGGGGNNGGGTTAGCATGTGACA---AGGGG---TTTTTCCCGAAGGTTTTCCCGATATCAGCCAATCATGTATT---TT
Fobul\_G14 ---GGAGAGGGGGCTTAGCATGTGACG---AGGGG---TTTTTCCCGAAGGTTTTCCCGATAACAGCCAGTCTGTATTTCCTTT

```

Fotul_Tu67 CATTCCCTACCAGTCATTGTAATTAAG-----
Fobul_G14 CAA-----CAGGAG-----AGATCATCAACTCAAGATACGGT-
Fogla_G2 CAA-----CAGGAG-----AGATCATCAACTCAAGATACGGTA
Fogla_G76 CAA-----CAGGAG-----AGATCATCAACTCAAGATACGGTA
Folag_001 CAA-----CAGTAG-----AGGTCATCAAC-----
Foniv_010_1 CAA-----CAGTAG-----AGGTCATCAAC-----
Foniv_019_1 CAA-----CAGTAG-----AGGTCATCAAC-----
Foniv_021_1 CAA-----CAGTAG-----AGGTCATCAAC-----
Foniv_037_1 CAA-----CAGTAG-----AGGTCATCAAC-----
Fomom_001 CAA-----CAGTAG-----AGGTCATCAA-----
Fomom_004 CAA-----CAGTAG-----AGGTCATCAA-----
Foniv_002_1 CAA-----CAGTAG-----AGGTCATCAA-----
Foniv_015_1 CAA-----CAGTAG-----AGGTCATCAA-----
Foniv_020_1 CAA-----CAGTAG-----AGGTCATCAA-----
Fomln_004 CAA-----CAGTAG-----AGGTCATCAAC-----
Fomln_013 CAA-----CAGTAG-----AGGTCATCAAC-----
Fomln_005 CAA-----CAGTAG-----AGGTCATCAA-----
Fomln_006 -----
Fomln_012 -----
Fomln_016 CAA-----CAGTAG-----AGGTCATCAA-----
Forcu_016 CAA-----CAGTAG-----AGGTCATCAA-----
Forcu_024 CAA-----CAGTAG-----AGGTCATCAA-----
Forcu_031 CAA-----CAGTAG-----AGGTCATCAA-----
Foniv_005_1 CAA-----CAGTAG-----AGGTCATCAAC-----
Foluf_001_1 CAA-----CAGTAG-----AGGTCATCAA-----
Foniv_013_1 CAA-----CAGTAG-----AGGTCATCAAC-----
Forap_PHW815 CAGTCCCTAAAGCGGCCAACATTGGGATGTTAGGTTA-----
Focuc_018 CAGCCCCTAAAGCAGCCAGAATTGGGATGTTAGGTTA-----
Focuc_021 CAGCCCCTAAAGCAGCCAGAATTGGGATGTTAGGTTA-----
Focuc_030 CAGCCCCTAAAGCAGCCAGAATTGGGATGTTAGGTT-----
Focuc_037 CAGCCCCTAAAGCAGCCAGAATTGGGATGTTAGGTTAGCA-----
Focuc_001 CAGCCCCTAAAGCAGCCAGAATTGGGATGTTAGGTTAGC-----
Focuc_013 CAGCCCCTAAAGCAGCCAGAATTGGGATGTTAGGTTAGC-----
Focuc_011 CAGCCCCTAAAGCAGCCAGAATTGGGATGTTAGGTTAGC-----
Focuc_015 CAGCCCCTAAAGCAGCCAGAATTGGGATGTTAGGTTAGC-----
Focuc_035 CAGCCCCTAAAGCAGCCAGAATTGGGATGTTAGGTTAGC-----
Foluf_001_0 CAATCCCTGAAGCAGTGAAAAATGCCATGTTAGATTAGCAAT-----
Foluf_002 CAATCCCTGAAGCAGTGAAAAATGCCATGTTAGATTAGCAATT-----
Fopis_HDV247 CAATCCCTAAAGTAGTTAAGAATAGGAGTTTAGTCTAGCAATTCA-----
Fomln_010 CAATCCCTAAAGTAGTTAAGAATATGAGTTTAGTCTAGCAATTTC-----
Foniv_002_0 CAATCCCTAAAGTAGTTAAGAATATGAGTTTAGTCTAGCAATTTC-----
Foniv_015_0 CAATCCCTAAAGTAGTTAAGAATATGAGTTTAGTCTAGCAATTTC-----
Foniv_021_0 CAATCCCTAAAGTAGTTAAGAATATGAGTTTAGTCTAGCAATTTC-----
Foniv_005_0 CAATCCCTAAAGTAGTTAAGAATATGAGTTTAGTCTAGCAATTCA-----
Foniv_010_0 CAATCCCTAAAGTAGTTAAGAATATGAGTTTAGTCTAGCAATTCA-----
Foniv_013_0 CAATCCCTAAAGTAGTTAAGAATATGAGTTTAGTCTAGCAATTCA-----
Foniv_019_0 CAATCCCTAAAGTAGTTAAGAATATGAGTTTAGTCTAGCAATTCA-----
Foniv_020_0 CAATCCCTAAAGTAGTTAAGAATATGAGTTTAGTCTAGCAATTCA-----
Foniv_037_0 CAATCCCTAAAGTAGTTAAGAATATGAGTTTAGTCTAGCAATTCA-----

```

```
1
Focuc_015_1  -----NNNNNNNNNNNNNNNNNNNNNNNNNNNNNNNNNNNNNNNNNNNNNNNNNNNNNNNNNNNNNNNNNNNNNNNNNNNNNNNNNNNNNNNNNNNNNNNN
Focuc_011    -----AATTAATA-----GTAAGTTAGACAGCAGCAAGCTGTGATGATAAAACCACTCATGCATTGCTCTAAGTGGGGATTCC
Focuc_013    -----AATTAATA-----GTAAGTTAGACAGCAGCAAGCTGTGATGATAAAACCACTCATGCATTGCTCTAAGTGGGGATTCC
Focuc_001_1  -----GACCAAAGTCCATTCCAGCTGGGGGGGTGTGTCAGATAAAACCACTCATGCATTGCTCTAAGTGGGGATTCC
Focuc_037_1  -----GACCAAAGTCCATTCCAGCTGGGGGGGTGTGTCAGATAAAACCACTCATGCATTGCTCTAAGTGGGGATTCC
Focuc_035_1  -----TGAACAAAGTCCATTCCAGCTGGGGGGGTGTGTCAGATAAAACCACTCATGCATTGCTCTAAGTGGGGATTCC
Focuc_018    -----TGTTCAGATAAAACCACTCATGCATTGCTCTAAGTGGGGATTCC
Focuc_021    -----GACCAAAGTCCATTCCAGCTGGGGGGGTGTGTCAGATAAAACCACTCATGCATTGCTCTAAGTGGGGATTCC
Focuc_030    -----TAAACCACTCATGCATTGCTCTAAGTGGGGATTCC
Foluf_001_1  -----GTATGAATGCC-----CTGAAGCCG-----CCGCGTAAATACATAAACCCTTAATAACCTCTTCTCTGCGCGTCTG
Foluf_002_1  -----GTATGAATGCC-----CTGAAGCCG-----CCGCGTAAATACATAAACCCTTAATAACCTCTTCTCTGCGCGTCTG
Fopis_HDV247 -----ACGAACGGCAGATAATAGTTCCGCTTTGAAGGTTAACTTTATTTAGAAGG-----AGGTAACCTCTTCTCTGCGCGTCTG
Folag_001    GCGCCTGAAGCCGCTACTTGAAGAATGCAGCGACC-----TTAA-----CAACCTCTTCTCTGCGCGTCTG
Folag_004    GCGCCTGAAGCCGCTACTTGAAGAATGCAGCGACC-----TTAA-----CAACCTCTTCTCTGCGCGTCTG
Folag_002    -CCCTGAAGCCGCTACTTGAAGAATGCAGCGACC-----TTAA-----CAACCTCTTCTCTGCGCGTCTG
Folag_005    -CCCTGAAGCCGCTACTTGAAGAATGCAGCGACC-----TTAA-----CAACCTCTTCTCTGCGCGTCTG
Fomln_010_0  -CCCTGAAGCCGCTACTTGAAGAATGCAGCGACC-----TTAA-----CAACCTCTTCTCTGCGCGTCTG
Focuc_037_0  -----TTATTTTAGGCATGAC-----TTAAATTAGAAGG-----GTTTATTTTCTCAGTCGAGTG--
Foluf_002_0  -----TATTTTAGGCATGAC-----TTAAATTAGAAGG-----GTTTATTTTCTCAGTCGAGTG--
Focuc_001_0  -----TTATTTTAGGCATGAC-----TTAAATTAGAAGG-----GTTTATTTTCTCAGTCGAGTG--
Focuc_015_0  -----TTATTTTAGGCATGAC-----TTAAATTAGAAGG-----GTTTATTTTCTCAGTCGAGTG--
Focuc_035_0  -----TTATTTTAGGCATGAC-----TTAAATTAGAAGG-----GTTTATTTTCTCAGTCGAGTG--
Foluf_001_0  -----TTATTTTAGGCATGAC-----TTAAATTAGAAGG-----GTTTATTTTCTCAGTCGAGTG--
Fomln_010_2  -----ATGACT-----TAACTCCAGGTAACATTACTTAGAAAA-----CTATAACTCTTCTCTGCGCGTCTG
Foniv_002_1  -----ATGACT-----TAACTCCAGGTAACATTACTTAGAAAA-----CTATAACTCTTCTCTGCGCGTCTG
Foniv_015_1  -----ATGACT-----TAACTCCAGGTAACATTACTTAGAAAA-----CTATAACTCTTCTCTGCGCGTCTG
Foniv_021_1  -----ATGACT-----TAACTCCAGGTAACATTACTTAGAAAA-----CTATAACTCTTCTCTGCGCGTCTG
Foniv_005_1  -----CATGACT-----TAACTCCAGGTAACATTACTTAGAAAA-----CTATAACTCTTCTCTGCGCGTCTG
Foniv_010_1  -----CATGACT-----TAACTCCAGGTAACATTACTTAGAAAA-----CTATAACTCTTCTCTGCGCGTCTG
Foniv_013_1  -----CATGACT-----TAACTCCAGGTAACATTACTTAGAAAA-----CTATAACTCTTCTCTGCGCGTCTG
Foniv_019_1  -----CATGACT-----TAACTCCAGGTAACATTACTTAGAAAA-----CTATAACTCTTCTCTGCGCGTCTG
Foniv_020_1  -----CATGACT-----TAACTCCAGGTAACATTACTTAGAAAA-----CTATAACTCTTCTCTGCGCGTCTG
Foniv_037_1  -----CATGACT-----TAACTCCAGGTAACATTACTTAGAAAA-----CTATAACTCTTCTCTGCGCGTCTG
Foniv_005_0  -----TCTCTTTTGTGCGCGTCTG
Foniv_015_0  -----ACATATGACT-----TAACTTAGGTAACATTACTTAGAAAA-----CTATAACTCTTCTCTGCGCGTCTG
Foniv_020_0  -----TACATATGACT-----TAACTTAGGTAACATTACTTAGAAAA-----CTATAACTCTTCTCTGCGCGTCTG
Foniv_019_0  -----TACATATGACT-----TAACTTAGGTAACATTACTTAGAAAA-----CTATAACTCTTCTCTGCGCGTCTG
Foniv_010_0  -----ACATATGACT-----TAACTTAGGTAACATTACTTAGAAAA-----CTATAACTCTTCTCTGCGCGTCTG
Foniv_002_0  -----ACATATGACT-----TAACTTAGGTAACATTACTTAGAAAA-----CTATAACTCTTCTCTGCGCGTCTG
Fomln_010_1  -----ACATATGACT-----TAACTTAGGTAACATTACTTAGAAAA-----CTATAACTCTTCTCTGCGCGTCTG
Foniv_013_0  -----ACATATGACT-----TAACTTAGGTAACATTACTTAGAAAA-----CTATAACTCTTCTCTGCGCGTCTG
Foniv_021_0  -----ACATATGACT-----TAACTTAGGTAACATTACTTAGAAAA-----CTATAACTCTTCTCTGCGCGTCTG
Foniv_037_0  -----TACATATGACT-----TAACTTAGGTAACATTACTTAGAAAA-----CTATAACTCTTCTCTGCGCGTCTG
Forap_PHW815_0 -----AAGTTGAC-----GAATTTGGTGCTCTTTT-----TTTTTTTTTTTTTTAGCAAAAGGG
Forap_PHW815_1 -----ATTGTCGGCGAATTGCAAGATTGCG-----GACATCGGAGGCA-----TGTGGCTAGTATGTCGTGAATGTG
```

ip7313  
fwd >  
Foniv

```
101
Focuc_015_1  NNNNNNNNNNNNNNNNNNNNNNNNNNNNNNNNNGTAG-----TTGGTAA-----AATCTAACCAAGCCTCTGATTATA-----TACTC
Focuc_011    CCATTTTGGTGGCGTGT-----GGTGTAG-----TTGGTAA-----AATCTAACCAAGCCTCTGATTATA-----TACTC
Focuc_013    CCATTTTGGTGGCGTGT-----GGTGTAG-----TTGGTAA-----AATCTAACCAAGCCTCTGATTATA-----TACTC
Focuc_001_1  CCATTTTGGTGGCGTGT-----GGTGTAG-----TTGGTAA-----AATCTAACCAAGCCTCTGATTATA-----TACTC
Focuc_037_1  CCATTTTGGTGGCGTGT-----GGTGTAG-----TTGGTAA-----AATCTAACCAAGCCTCTGATTATA-----TACTC
Focuc_035_1  CCATTTTGGTGGCGTGT-----GGTGTAG-----TTGGTAA-----AATCTAACCAAGCCTCTGATTATA-----TACTC
Focuc_018    CCATTTTGGTGGCGTGT-----GGTGTAG-----TTGGTAA-----AATCTAACCAAGCCTCTGATTATA-----TACTC
Focuc_021    CCATTTTGGTGGCGTGT-----GGTGTAG-----TTGGTAA-----AATCTAACCAAGCCTCTGATTATA-----TACTC
Focuc_030    CCATTTTGGTGGCGTGT-----GTTGTAG-----TTGGTAA-----AATCTAACCAAGCCTCTGATTATA-----TACTC
Foluf_001_1  CGG-----TCTTGT-----ATATGTA-----TTAATAATATAAGTTTAAAGTTTACGATA-----TTTCTAAAATATA-----AAFACTC
Foluf_002_1  CGG-----TCTTGT-----ATATGTA-----TTAATAATATAAGTTTAAAGTTTACGATA-----TTTCTAAAATATA-----AAFACTC
Fopis_HDV247 GCGTCTGAGCGCTTTAC-----TTAATTTAATATC-----CTAGTAA-----TATTAAGAAAGTTTACACCC-----ATTCTGAAATATAATATGTTTACTC
Folag_001    CGA-----TCTTGC-----AAAT-----TTATTAA-----ATTAAAAGTTTACACC-----TTTCTGAAATATA-----AATACTC
Folag_004    CGA-----TCTTGC-----AAAT-----TTATTAA-----ATTAAAAGTTTACACC-----TTTCTGAAATATA-----AATACTC
Folag_002    CGA-----TCTTGC-----AAAT-----TTATTAA-----ATTAAAAGTTTACACC-----TTTCTGAAATATA-----AATACTC
Folag_005    CGA-----TCTTGC-----AAAT-----TTATTAA-----ATTAAAAGTTTACACC-----TTTCTGAAATATA-----AATACTC
Fomln_010_0  CGA-----TCTTGC-----AAAT-----TTATTAA-----ATTAAAAGTTTACACC-----TTTCTGAAATATA-----AATACTC
Focuc_037_0  TAA-----GCTAGTATAAACTTTAAATGTAACACTCACTGTTTGTAACTCGCTTATCAGGTACGTTA-----CTTCTAAAATATA-----TACTC
Foluf_002_0  TAA-----GCTAGTATAAACTTTAAATGTAACACTCACTGTTTGTAACTCGCTTATCAGGTACGTTA-----CTTCTAAAATATA-----TACTC
Focuc_001_0  TAA-----GCTAGTATAAACTTTAAATGTAACACTCACTGTTTGTAACTCGCTTATCAGGTACGTTA-----CTTCTAAAATATA-----TACTC
Focuc_015_0  TAA-----GCTAGTATAAACTTTAAATGTAACACTCACTGTTTGTAACTCGCTTATCAGGTACGTTA-----CTTCTAAAATATA-----TACTC
Focuc_035_0  TAA-----GCTAGTATAAACTTTAAATGTAACACTCACTGTTTGTAACTCGCTTATCAGGTACGTTA-----CTTCTAAAATATA-----TACTC
Foluf_001_0  TAA-----GCTAGTATAAACTTTAAATGTAACACTCACTGTTTGTAACTCGCTTATCAGGTACGTTA-----CTTCTAAAATATA-----TACTC
Fomln_010_2  CGG-----GCTGGC-----TGATGATTAATC-----TTGGTAA-----TTTTAAAATTTTATGTA-----CTTCTAAAAGTATA-----TATACTC
Foniv_002_1  CGG-----GCTGGC-----TGATGATTAATC-----TTGGTAA-----TTTTAAAATTTTATGTA-----CTTCTAAAAGTATA-----TATACTC
Foniv_015_1  CGG-----GCTGGC-----TGATGATTAATC-----TTGGTAA-----TTTTAAAATTTTATGTA-----CTTCTAAAAGTATA-----TATACTC
Foniv_021_1  CGG-----GCTGGC-----TGATGATTAATC-----TTGGTAA-----TTTTAAAATTTTATGTA-----CTTCTAAAAGTATA-----TATACTC
Foniv_005_1  CGG-----GCTGGC-----TGATGATTAATC-----TTGGTAA-----TTTTAAAATTTTATGTA-----CTTCTAAAAGTATA-----TATACTC
Foniv_010_1  CGG-----GCTGGC-----TGATGATTAATC-----TTGGTAA-----TTTTAAAATTTTATGTA-----CTTCTAAAAGTATA-----TATACTC
Foniv_013_1  CGG-----GCTGGC-----TGATGATTAATC-----TTGGTAA-----TTTTAAAATTTTATGTA-----CTTCTAAAAGTATA-----TATACTC
Foniv_019_1  CGG-----GCTGGC-----TGATGATTAATC-----TTGGTAA-----TTTTAAAATTTTATGTA-----CTTCTAAAAGTATA-----TATACTC
Foniv_020_1  CGG-----GCTGGC-----TGATGATTAATC-----TTGGTAA-----TTTTAAAATTTTATGTA-----CTTCTAAAAGTATA-----TATACTC
Foniv_037_1  CGG-----GCTGGC-----TGATGATTAATC-----TTGGTAA-----TTTTAAAATTTTATGTA-----CTTCTAAAAGTATA-----TATACTC
Foniv_005_0  CGG-----GCTAGT-----TAATATAGTAAATC-----CTAGTAA-----TTTAAAGTTTCTATT-----CTTCTAAAAGTATA-----TATACTC
Foniv_015_0  CGG-----GCTAGT-----TAATATAGTAAATC-----TTAGTAA-----TTTAAAGTTTCTATA-----CTTCTAAAAGTATA-----TATACTC
Foniv_020_0  CGG-----GCTAGT-----TAATATAGTAAATC-----TTAGTAA-----TTTAAAGTTTCTATA-----CTTCTAAAAGTATA-----TATACTC
Foniv_019_0  CGG-----GCTAGT-----TAATATAGTAAATC-----TTAGTAA-----TTTAAAGTTTCTATA-----CTTCTAAAAGTATA-----TATACTC
Foniv_010_0  CGG-----GCTAGT-----TAATATAGTAAATC-----TTAGTAA-----TTTAAAGTTTCTATA-----CTTCTAAAAGTATA-----TATACTC
Foniv_002_0  CGG-----GCTAGT-----TAATATAGTAAATC-----TTAGTAA-----TTTAAAGTTTCTATA-----CTTCTAAAAGTATA-----TATACTC
Fomln_010_1  CGG-----GCTAGT-----TAATATAGTAAATC-----TTAGTAA-----TTTAAAGTTTCTATA-----CTTCTAAAAGTATA-----TATACTC
Foniv_013_0  CGG-----GCTAGT-----TAATATAGTAAATC-----TTAGTAA-----TTTAAAGTTTCTATA-----CTTCTAAAAGTATA-----TATACTC
Foniv_021_0  CGG-----GCTAGT-----TAATATAGTAAATC-----TTAGTAA-----TTTAAAGTTTCTATA-----CTTCTAAAAGTATA-----TATACTC
Foniv_037_0  CGG-----GCTAGT-----TAATATAGTAAATC-----TTAGTAA-----TTTAAAGTTTCTATA-----CTTCTAAAAGTATA-----TATACTC
Forap_PHW815_0 TGG-----TCTGTCGAAGGGGGGTTGTTT-----ATGGTAG-----TAGTTTAAAATTTTATATA-----CTTCTAAAATATA-----TATACTC
Forap_PHW815_1 GTG-----TGTGTGACGAATTGAGAGTTGGGTC-----GTATCAA-----TAGAGTCTG-----TCCAAAATATA-----TATACTC
```

ip7320  
fwd >  
Foluf

ip7313  
fwd >  
Foniv











1001

```
Focuc_015_1 ATTCTAAGTTTAAAGATGATTTTATCCAAACAAATT-----  
Focuc_011 ATTCTAAGTTTAAAGATGATTTTATCCAAACAAATT-----  
Focuc_013 ATTCTAAGTTTAAAGATGATTTTATCCAAACAAATT-----  
Focuc_001_1 ATTCTAAGTTTAAAGATGATTTTATCCAAACAAATT-----  
Focuc_037_1 ATTCTAAGTTTAAAGATGATTTTATCCAAACAAATT-----  
Focuc_035_1 ATTCTAAGTTTAAAGATGATTTTATCCAAACAAATT-----  
Focuc_018 ATTCTAAGTTTAAAGATGATTTTATCCAAACAAATT-----  
Focuc_021 ATTCTAAGTTTAAAGATGATTTTATCCAAACAAATT-----  
Focuc_030 ATTCTAAGTTTAAAGATGATTTTATCCAAACAAATT-----  
Foluf_001_1 ACTTAAACTCAGGAGTATGGTAGTCAATTAGAAAGCTAAAGAACTCATAGCTAGGTTTAAATTTGTCAGCCTGTTACGCA  
Foluf_002_1 ACTTAAACTCAGGAGTATGGTAGTCAATTAGAAAGCTAAAGAACTCATAGCTAGGTTTAAATTTGTCAGCCTGTTACGCA  
Fopis_HDV247 GCTTTATACTCAGGATTGTGGTAGTCAATTAGACGGCTAAAGAA-----  
Folag_001 ACTTTATACTCAGGATTGTGGTAGTGAATTAGACGGCCAAAAGA-----  
Folag_004 ACTTTATACTCAGGATTGTGGTAGTGAATTAGACGGCCAAAAGA-----  
Folag_002 ACTTTATACTCAGGATTGTGGTAGTGAATTAGACGGCCAAAAGA-----  
Folag_005 ACTTTATACTCAGGATTGTGGTAGTGAATTAGACGGCCAAAAGA-----  
Fomln_010_0 ACTTTATACTCAGGATTGTGGTAGTGAATTAGACGGCCAAAAGA-----  
Focuc_037_0 TCCTCAACTTCAGGATTAAGGTTTCAGGATTA-----  
Foluf_002_0 CCCTCAACTTCAGGATTAAGGTTTCAGGATTAAG-----  
Focuc_001_0 CCCTCAACTTCAGGATTAAGGTTTCAGGATTAAG-----  
Focuc_015_0 -----  
Focuc_035_0 -----  
Foluf_001_0 CCCTCAACTTCAGGATTAAGGTTTCAGGATTAAG-----  
Fomln_010_2 ACTTTATACTCAGGATTGTGGTAGTCAATTAGACGGCTAAAGAA-----  
Foniv_002_1 ACTTTATACTCAGGATTGTGGTAGTCAATTAGACGGCTAAAGAA-----  
Foniv_015_1 ACTTTATACTCAGGATTGTGGTAGTCAATTAGACGGCTAAAGAA-----  
Foniv_021_1 ACTTTATACTCAGGATTGTGGTAGTCAATTAGACGGCTAAAGAA-----  
Foniv_005_1 ACTTTATACTCAGGATTGTGGTAGTCAATTAGACGGCTAAAGAA-----  
Foniv_010_1 ACTTTATACTCAGGATTGTGGTAGTCAATTAGACGGCTAAAGAA-----  
Foniv_013_1 ACTTTATACTCAGGATTGTGGTAGTCAATTAGACGGCTAAAGAA-----  
Foniv_019_1 ACTTTATACTCAGGATTGTGGTAGTCAATTAGACGGCTAAAGAA-----  
Foniv_020_1 ACTTTATACTCAGGATTGTGGTAGTCAATTAGACGGCTAAAGAA-----  
Foniv_037_1 ACTTTATACTCAGGATTGTGGTAGTCAATTAGACGGCTAAAGAA-----  
Foniv_005_0 -----  
Foniv_015_0 -----  
Foniv_020_0 -----  
Foniv_019_0 -----  
Foniv_010_0 -----  
Foniv_002_0 GCTCTATACTCAGGACTGTGGTAGTCAATTACAC-----  
Fomln_010_1 GCTCTATACTCAGGACTGTGGTAGTCAATTACAC-----  
Foniv_013_0 GCTCTATACTCAGGACTGTGGTAGTCAATTACAC-----  
Foniv_021_0 GCTCTATACTCAGGACTGTGGTAGTCAATTACACGG-----  
Foniv_037_0 GCTCTATACTCAGGACTGTGGTAGTCAATTACACGG-----  
Forap_PHW815_0 ACTCTATACTCAGGATTGTGGTAGTCAATTAGAAAGGCTAACGAACTTTTGG-----  
Forap_PHW815_1 ACTCTATACCCAGGATTGTGGTAGTCAATTGGACGGCT-----
```









|                |       |
|----------------|-------|
| Foniv_002      | GTAA- |
| Foniv_005      | GTAA- |
| Foniv_010      | GTAA- |
| Foniv_015      | GTAA- |
| Foniv_013      | GTA-- |
| Foniv_019      | GTA-- |
| Foniv_020      | GTA-- |
| Foniv_021      | GTA-- |
| Foniv_037      | GTA-- |
| Fonar_Na5      | GTA-- |
| Focuc_001      | GT--- |
| Focuc_030      | GT--- |
| Focuc_035      | GT--- |
| Focuc_011      | G---- |
| Focuc_013      | G---- |
| Focuc_015      | G---- |
| Focuc_018      | G---- |
| Focuc_021      | G---- |
| Focuc_037      | G---- |
| Fomln_001      | GT--- |
| Fomln_006      | GT--- |
| Fomln_010      | GT--- |
| Fomln_011      | GT--- |
| Fomln_004      | G---- |
| Fomln_005      | G---- |
| Fomln_013      | G---- |
| Fomln_016      | G---- |
| Fophy_KOD886_1 | GTAA- |
| Fophy_KOD887_1 | GTAA- |
| Fophy_KOD888_1 | GTAAA |
| Fonic_001      | GTAA- |
| Fonic_003      | GTAAA |
| Fonic_010      | GTAAA |
| Fonic_012      | GTAAA |
| Fophy_KOD886_0 | GTAAA |
| Fophy_KOD887_0 | GTAAA |
| Fophy_KOD888_0 | GTAA- |



```
1
Fonic_001 -ATCATGACTACTCCCTGGATCCATCGCCTGTTTGCTTACTCGGCAGTTGAGCTCGGCAGCTGAGCTCGGCAGCTGAATACATATGGTGTTCGA-----
Fonic_003 TATCATGACTACTCCCTGGATCCATCGCCTGTTTGCTTACTCGGCAGTTGAGCTCGGCAGCTGAGCTCGGCAGCTGAATACATATGGTGTTCGA-----
Fonic_010 TATCATGACTACTCCCTGGATCCATCGCCTGTTTGCTTACTCGGCAGTTGAGCTCGGCAGCTGAGCTCGGCAGCTGAATACATATGGTGTTCGA-----
Fonic_012 TATCATGACTACTCCCTGGATCCATCGCCTGTTTGCTTACTCGGCAGTTGAGCTCGGCAGCTGAGCTCGGCAGCTGAATACATATGGTGTTCGA-----
Focub_B2_2 -----ACTAAG--GAACTGCCTGCCTGATATTAACATCCATCACTACCAT-----C-----
Focub_II5_2 -----CTAAG--GAACTGCCTGCCTGATATTAACATCCATCACTACCAT-----C-----
Fomel_001_0 -----AAGCAGATTTGCCCTTACG--CGTCTCATACTTCGAAACCAC-----CCCTCCC-----
Fomel_001_1 -----AGCAGATTTGCCCTTACG--CGTCTCATACTTCGAAACCAC-----CCCTCCC-----
Fophy_KOD886 -----AAGCAGATTTGCCCTTACG--CGTCTCATACTTCGAAACCAC-----CCCTCCC-----
Fophy_KOD887 -----AAGCAGATTTGCCCTTACG--CGTCTCATACTTCGAAACCAC-----CCCTCCC-----
Fophy_KOD888 -----AAGCAGATTTGCCCTTACG--CGTCTCATACTTCGAAACCAC-----CCCTCCC-----
Folyc_4287 -----NNNNNNNNNNNNNNNNNNNN--NNNNNNNNNNNNNNNNNNNNNNNT-----CCCTCCC-----
Folyc_002 -----AGCAGATTTGCCCTTCCG--CATCCTCATACTTCGAAACCAC-----CCCTCCC-----
Folyc_026 -----AGCAGATTTGCCCTTCCG--CATCCTCATACTTCGAAACCAC-----CCCTCCC-----
Folyc_038 -----AGCAGATTTGCCCTTCCG--CATCCTCATACTTCGAAACCAC-----CCCTCCC-----
Folyc_004 -----AAGCAGATTTGCCCTTCCG--CATCCTCATACTTCGAAACCAC-----CCCTCCC-----
Folyc_029 -----AAGCAGATTTGCCCTTCCG--CATCCTCATACTTCGAAACCAC-----CCCTCCC-----
Folyc_074 -----AAGCAGATTTGCCCTTCCG--CATCCTCATACTTCGAAACCAC-----CCCTCCC-----
Folyc_MN25 -----AAGCAGATTTGCCCTTCCG--CATCCTCATACTTCGAAACCAC-----CCCTCCC-----
Folyc_007 -----AGCAGATTTGCCCTTCCG--CATCCTCATACTTCGAAACCAC-----CCCTCCC-----
Folyc_014 -----AGCAGATTTGCCCTTCCG--CATCCTCATACTTCGAAACCAC-----CCCTCCC-----
Folyc_016 -----AGCAGATTTGCCCTTCCG--CATCCTCATACTTCGAAACCAC-----CCCTCCC-----
Folyc_018 -----AGCAGATTTGCCCTTCCG--CATCCTCATACTTCGAAACCAC-----CCCTCCC-----
Folyc_069 -----AGCAGATTTGCCCTTCCG--CATCCTCATACTTCGAAACCAC-----CCCTCCC-----
Folyc_072 -----AGCAGATTTGCCCTTCCG--CATCCTCATACTTCGAAACCAC-----CCCTCCC-----
Folyc_073 -----AAGCAGATTTGCCCTTCCG--CATCCTCATACTTCGAAACCAC-----CCCTCCC-----
Folyc_075 -----AAGCAGATTTGCCCTTCCG--CATCCTCATACTTCGAAACCAC-----CCCTCCC-----
Foccon_5176 -----GACAAGAACAAGCAGATTTGCCCTTCCG--CGTCC-----AACCAT-----CCCTCCC-----
Foccon_PHW808 -----GACAAGAACAAGCAGATTTGCCCTTCCG--CGTCC-----AACCAT-----CCCTCCC-----
Fopis_HDV247_1 -----AGCAGATTTGCCCTTACG--CGTCTCATACTTCGAAACCAC-----CCCTTCC-----
Focub_B2_1 -----AAGCAGATTTGCCCTTACG--CGTCTCATACTTCGAAACCAC-----CCCTCCC-----
Focub_II5_1 -----AAGCAGATTTGCCCTTACG--CGTCTCATACTTCGAAACCAC-----CCCTCCC-----
Focub_N2 -----AGCAGATTTGCCCTTACG--CGTCTCATACTTCGAAACCAC-----CCCTCCC-----
Focub_B2_0 -----AGCAGATTTGCCCTTACG--CGTCTCATACTTCGAAACCAC-----CCCTCCC-----
Focub_II5_0 -----AAGCAGATTTGCCCTTACG--CGTCTCATACTTCGAAACCAC-----CCCTCCC-----
Fomln_010_0 -----GCTTGCCCGGTTG--TGACATC--CATCACTACCAT-----CACGGCCTCAATT-----
Fomln_009_0 -----GCTTGCCCGGTTG--TGACATC--CATCACTACCAT-----CACGGCCTCAATT-----
Fomln_011_0 -----TGCTTGCCCGGTTG--TGACATC--CATCACTACCAT-----CACGGCCTCAATT-----
Fopis_HDV247_0 -----AAGCAGATTTGCCCTTACG--CGTCTCATACTTCGAAACCAC-----CCCTTCC-----
Fomln_001 -----AGCAGATTTGCCCTTACG--CGTCTCATGCTTCGAAACCAC-----CCCTCCC-----
Fomln_004 -----AGCAGATTTGCCCTTACG--CGTCTCATGCTTCGAAACCAC-----CCCTCCC-----
Fomln_005 -----AGCAGATTTGCCCTTACG--CGTCTCATGCTTCGAAACCAC-----CCCTCCC-----
Fomln_009_1 -----AGCAGATTTGCCCTTACG--CGTCTCATGCTTCGAAACCAC-----CCCTCCC-----
Fomln_011_1 -----AGCAGATTTGCCCTTACG--CGTCTCATGCTTCGAAACCAC-----CCCTCCC-----
Fomln_012 -----AGCAGATTTGCCCTTACG--CGTCTCATGCTTCGAAACCAC-----CCCTCCC-----
Fomln_006 -----GCAGATTTGCCCTTACG--CGTCTCATGCTTCGAAACCAC-----CCCTCCC-----
Fomln_010_1 -----GCAGATTTGCCCTTACG--CGTCTCATGCTTCGAAACCAC-----CCCTCCC-----
Fomln_013 -----GCAGATTTGCCCTTACG--CGTCTCATGCTTCGAAACCAC-----CCCTCCC-----
Fomln_016 -----GCAGATTTGCCCTTACG--CGTCTCATGCTTCGAAACCAC-----CCCTCCC-----
Folag_001 -----AGCAGATTTGCCCTTACG--CGTCTCATGCTTCGAAACCAC-----CCCTCCC-----
Folag_002 -----AGCAGATTTGCCCTTACG--CGTCTCATGCTTCGAAACCAC-----CCCTCCC-----
Fomom_001 -----AGCAGATTTGCCCTTACG--CGTCTCATGCTTCGAAACCAC-----CCCTCCC-----
Folag_004 -----GCAGATTTGCCCTTACG--CGTCTCATGCTTCGAAACCAC-----CCCTCCC-----
Folag_005 -----GCAGATTTGCCCTTACG--CGTCTCATGCTTCGAAACCAC-----CCCTCCC-----
Fomom_004 -----GCAGATTTGCCCTTACG--CGTCTCATGCTTCGAAACCAC-----CCCTCCC-----
```













```
Fonic_001 -----
Fonic_003 -----
Fonic_010 -----
Fonic_012 -----
Focub_B2_2 TTTGGCAACCCCTACT-ATACGG-----
Focub_II5_2 TTTGGCAACCCCTACT-ATACGGT-----
Fomel_001_0 TCTGTACTTTCTCTA-----
Fomel_001_1 TTTGGCAACCCGCTAGT-ATGCTGT-----
Fophy_KOD886 TTTGGCAGCCGCTAGT-ATGCTG-----
Fophy_KOD887 TTTGGCAGCCGCTAGT-ATGCTG-----
Fophy_KOD888 TTTGGCAGCCGCTAGT-ATGCTG-----
Folyc_4287 TTTGGCAACCGCTAAT-ATACTGTTGAGT
Folyc_002 TTTGGCAACCGCTAAT-ATACTGTTGAGT
Folyc_026 TTTGGCAACCGCTAAT-ATACTGTTGAGT
Folyc_038 TTTGGCAACCGCTAAT-ATACTGTTGAGT
Folyc_004 TTTGGCAACCGCTAAT-ATACTGTTGAG-
Folyc_029 TTTGGCAACCGCTAAT-ATACTGTTGAG-
Folyc_074 TTTGGCAACCGCTAAT-ATACTGTTGAG-
Folyc_MN25 TTTGGCAACCGCTAAT-ATACTGTTGAG-
Folyc_007 TTTGGCAACCGCTAAT-ATACTGTTGAGT
Folyc_014 TTTGGCAACCGCTAAT-ATACTGTTGAGT
Folyc_016 TTTGGCAACCGCTAAT-ATACTGTTGAGT
Folyc_018 TTTGGCAACCGCTAAT-ATACTGTTGAGT
Folyc_069 TTTGGCAACCGCTAAT-ATACTGTTGAGT
Folyc_072 TTTGGCAACCGCTAAT-ATACTGTTGAGT
Folyc_073 TTTGGCAACCGCTAAT-ATACTGTTGAG-
Folyc_075 TTTGGCAACCGCTAAT-ATACTGTTGAG-
Focon_5176 TTTGGCCACCCTA-----
Focon_PHW808 TTTGGCCACCCTA-----
Fopis_HDV247_1 TTTTCGCAACCGCTAGT-ATACTGTT----
Focub_B2_1 TTTGGGGACCCTAAT-ATACTGT-----
Focub_II5_1 TTTGGGGACCCTAAT-ATACTGT-----
Focub_N2 TTTGGCAACCGCTAAT-ATAC-----
Focub_B2_0 TTTGGCAACCGCTAAT-ATACTGTCCG--
Focub_II5_0 TTTGGCAACCGCTAAT-ATACTGTCCG--
Fomln_010_0 TTTGGCAACCGCTAAT-ATACCGTT----
Fomln_009_0 TTTGGCAACCGCTAAT-ATACCGTT----
Fomln_011_0 TTTGGCAACCGCTAAT-ATACCGT-----
Fopis_HDV247_0 TTTGGCAACCGCTCATAATACTG-----
Fomln_001 TTTGGCAACCGCTA-----
Fomln_004 TTTGGCAACCGCTA-----
Fomln_005 TTTGGCAACCGCTA-----
Fomln_009_1 TTTGGCAACCGCTA-----
Fomln_011_1 TTTGGCAACCGCTA-----
Fomln_012 TTTGGCAACCGCTA-----
Fomln_006 TTTGGCAACCGCTAA-----
Fomln_010_1 TTTGGCAACCGCTAA-----
Fomln_013 TTTGGCAACCGCTAA-----
Fomln_016 TTTGGCAACCGCTAA-----
Folag_001 TTTGGCAACCGCTA-----
Folag_002 TTTGGCAACCGCTA-----
Fomom_001 TTTGGCAACCGCTA-----
Folag_004 TTTGGCAACCGCTAA-----
Folag_005 TTTGGCAACCGCTAA-----
Fomom_004 TTTGGCAACCGCTAA-----
```



```
1
Fomln_009_1  --GATAAATGCT-TAAAGCTGGCTTCCTTAAAACTATAAAGCTTACC---TTCCCTA-TCCCCC-CTTAAATACTACCTAAGCTTAAGCCCTCTATTTAT
Fomln_011_1  --AGATAAATGCT-TAAAGCTGGCTTCCTTAAAACTATAAAGCTTACC---TTCCCTA-TCCCCC-CTTAAATACTACCTAAGCTTAAGCCCTCTATTTAT
Folyc_069    AGGACAAATGCT-TGAAGCTGGCTTCCTCAAAAATCTATAAAGCTCACC---TTCCCT-TCCCCC-CTTCAATGCTGCTCAAGCTCAAGCCCTCTGCTCAT
Folyc_002    AGGACAAATGCT-TGAAGCTGGCTTCCTCAAAAATCTATAAAGCTCACC---TTCCCT-TCCCCC-CTTCAATGCTGCTCAAGCTCAAGCCCTCTGCTCAT
Folyc_016    AGGACAAATGCT-TGAAGCTGGCTTCCTCAAAAATCTATAAAGCTCACC---TTCCCT-TCCCCC-CTTCAATGCTGCTCAAGCTCAAGCCCTCTGCTCAT
Folyc_038    AGGACAAATGCT-TGAAGCTGGCTTCCTCAAAAATCTATAAAGCTCACC---TTCCCT-TCCCCC-CTTCAATGCTGCTCAAGCTCAAGCCCTCTGCTCAT
Folyc_072    AGGACAAATGCT-TGAAGCTGGCTTCCTCAAAAATCTATAAAGCTCACC---TTCCCT-TCCCCC-CTTCAATGCTGCTCAAGCTCAAGCCCTCTGCTCAT
Folyc_073    AGGACAAATGCT-TGAAGCTGGCTTCCTCAAAAATCTATAAAGCTCACC---TTCCCT-TCCCCC-CTTCAATGCTGCTCAAGCTCAAGCCCTCTGCTCAT
Folyc_074    AGGACAAATGCT-TGAAGCTGGCTTCCTCAAAAATCTATAAAGCTCACC---TTCCCT-TCCCCC-CTTCAATGCTGCTCAAGCTCAAGCCCTCTGCTCAT
Folyc_075    AGGACAAATGCT-TGAAGCTGGCTTCCTCAAAAATCTATAAAGCTCACC---TTCCCT-TCCCCC-CTTCAATGCTGCTCAAGCTCAAGCCCTCTGCTCAT
Folyc_4287   AGGACAAATGCT-TGAAGCTGGCTTCCTCAAAAATCTATAAAGCTCACC---TTCCCT-TCCCCC-CTTCAATGCTGCTCAAGCTCAAGCCCTCTGCTCAT
Folyc_MN25   AGGACAAATGCT-TGAAGCTGGCTTCCTCAAAAATCTATAAAGCTCACC---TTCCCT-TCCCCC-CTTCAATGCTGCTCAAGCTCAAGCCCTCTGCTCAT
Folyc_004    -GGACAAATGCT-TGAAGCTGGCTTCCTCAAAAATCTATAAAGCTCACC---TTCCCT-TCCCCC-CTTCAATGCTGCTCAAGCTCAAGCCCTCTGCTCAT
Folyc_007    -GGACAAATGCT-TGAAGCTGGCTTCCTCAAAAATCTATAAAGCTCACC---TTCCCT-TCCCCC-CTTCAATGCTGCTCAAGCTCAAGCCCTCTGCTCAT
Folyc_014    -GGACAAATGCT-TGAAGCTGGCTTCCTCAAAAATCTATAAAGCTCACC---TTCCCT-TCCCCC-CTTCAATGCTGCTCAAGCTCAAGCCCTCTGCTCAT
Folyc_018    -GGACAAATGCT-TGAAGCTGGCTTCCTCAAAAATCTATAAAGCTCACC---TTCCCT-TCCCCC-CTTCAATGCTGCTCAAGCTCAAGCCCTCTGCTCAT
Folyc_026    -GGACAAATGCT-TGAAGCTGGCTTCCTCAAAAATCTATAAAGCTCACC---TTCCCT-TCCCCC-CTTCAATGCTGCTCAAGCTCAAGCCCTCTGCTCAT
Folyc_029    -GGACAAATGCT-TGAAGCTGGCTTCCTCAAAAATCTATAAAGCTCACC---TTCCCT-TCCCCC-CTTCAATGCTGCTCAAGCTCAAGCCCTCTGCTCAT
Focub_B2     -----CCCTATGAGGTTTGCTTCCCGGGCGTAATAAATACTACTACTACTACTACTCTCTCC-CTTGAATACTGCCCAAGCTCAAGCCCTCTGCTCAT
Focub_II5    -----CCCTATGAGGTTTGCTTCCCGGGCGTAATAAATACTACTACTACTACTACTCTCTCC-CTTGAATACTGCCCAAGCTCAAGCCCTCTGCTCAT
Forap_PHW815_1  ---CAATGCT-TGAAGCTGGCTTCCTCAAAAATCTATAAAGCTCACA---TTCCCTATCCCCCCCTTTTGAATACTGCCCAAACTCAAGCCCTGCTCAT
Focoon_5176  -GGACAAATGCT-CGAAGCTGGCTTCCTCAAAAATCTATAAAGCTCACC---TTCCCTA-TCCCCC-CTTGGATACTGCCCAAGCTCAAGCCCTCTGCTCAT
Focoon_PHW808  AGGACAAATGCT-CGAAGCTGGCTTCCTCAAAAATCTATAAAGCTCACC---TTCCCTA-TCCCCC-CTTGAATACTGCCCAAGCTCAAGCCCTCTGCTCAT
Forap_PHW815_0  -----TGCT-CTAAGCTGGCTTCCTCAAAAATCTATAAAGCTCACC---TTCCCTA-TCCCCC-CTTGAATACTGCCCAAGCTCAAGCCCTCTGCTCAT
Fopis_HDV247  -GACAAATGCT-CGAAGCTGGCTTCCTCAAAAATCTATAAAGCTCACC---TTCCCTA-TCCCCC-CTTGAATACTGCCCAAGCTCAAGCCCTCTGCTCAT
Folag_001_0   -GACAAATGCT-CGAAGCTGGCTTCCTCAAAAATCTATAAAGCTCACC---TTCCCTA-TCCCCC-CTTGAATACTGCCCAAGCTCAAGCCCTCTGCTCAT
Folag_005_0   -GACAAATGCT-CGAAGCTGGCTTCCTCAAAAATCTATAAAGCTCACC---TTCCCTA-TCCCCC-CTTGAATACTGCCCAAGCTCAAGCCCTCTGCTCAT
Folag_002_0   -GGACAAATGCT-CGAAGCTGGCTTCCTCAAAAATCTATAAAGCTCACC---TTCCCTA-TCCCCC-CTTGAATACTGCCCAAGCTCAAGCCCTCTGCTCAT
Folag_004_0   -GGACAAATGCT-CGAAGCTGGCTTCCTCAAAAATCTATAAAGCTCACC---TTCCCTA-TCCCCC-CTTGAATACTGCCCAAGCTCAAGCCCTCTGCTCAT
Fomom_001_0   -GGACAAATGCT-CGAAGCTGGCTTCCTCAAAAATCTATAAAGCTCACC---TTCCCTA-TCCCCC-CTTGAATACTGCCCAAGCTCAAGCCCTCTGCTCAT
Fomom_004_0   -GGACAAATGCT-CGAAGCTGGCTTCCTCAAAAATCTATAAAGCTCACC---TTCCCTA-TCCCCC-CTTGAATACTGCCCAAGCTCAAGCCCTCTGCTCAT
Fogla_G76     -GGCCAAATGCT-AGAAGCTGGCTTCCTCAAAAATCTATAAATCTCACC---TTCCCTA-TCCCCC-CTTGAATACTGCCCAAGCTCAAGCCCTCTGCTCAC
Fomom_001_2   -GATAAATACT-TGAAGCTGGCTTCCTCAAAAATCTATAAAGCTTACC---TTCCCTA-TCCCTC-CTTAAATACTGCCTAAGCTTAAGCCCTCTGTTTAT
Fomom_004_3   -GATAAATACT-TGAAGCTGGCTTCCTCAAAAATCTATAAAGCTTACC---TTCCCTA-TCCCTC-CTTAAATACTGCCTAAGCTTAAGCCCTCTGTTTAT
Fomom_001_1   -GCCAAATGCT-CGAAGCTGGCTTCCTCAAAAATCTATAAATCTCACC---TTCCCTA-TCCCCC-CTTGAATAATGCTCAAGCTCAAGCCCTCTGCTCAT
Fomom_004_1   -GGCCAAATGCT-CGAAGCTGGCTTCCTCAAAAATCTATAAATCTCACC---TTCCCTA-TCCCCC-CTTGAATAATGCTCAAGCTCAAGCCCTCTGCTCAT
Folil_39      -GACAAATGCT-CGAAGCTAATCTCCCAAAAATCTATAAAGATCACC---TTTCTATTCCCCC-CTTGAATACTGCCCAAGCTCAAGCCCTCTGCTCAT
Folag_001_1   ---ACAAATGCT-CGAAGCTGGCTTCCTCAAAAATCTATAAAGATCACC---TTTCTATTCCCCC-CTTGAATACTGCCCAAGCTCAAGCCCTCTGCTCAT
Folag_002_1   ---ACAAATGCT-CGAAGCTGGCTTCCTCAAAAATCTATAAAGATCACC---TTTCTATTCCCCC-CTTGAATACTGCCCAAGCTCAAGCCCTCTGCTCAT
Folag_004_1   ---ACAAATGCT-CGAAGCTGGCTTCCTCAAAAATCTATAAAGATCACC---TTTCTATTCCCCC-CTTGAATACTGCCCAAGCTCAAGCCCTCTGCTCAT
Folag_005_1   ---ACAAATGCT-CGAAGCTGGCTTCCTCAAAAATCTATAAAGATCACC---TTTCTATTCCCCC-CTTGAATACTGCCCAAGCTCAAGCCCTCTGCTCAT
Fomom_001_3   ---ACAAATGCT-CGAAGCTGGCTTCCTCAAAAATCTATAAAGATCACC---TTTCTATTCCCCC-CTTGAATACTGCCCAAGCTCAAGCCCTCTGCTCAT
Fomom_004_2   ---ACAAATGCT-CGAAGCTGGCTTCCTCAAAAATCTATAAAGATCACC---TTTCTATTCCCCC-CTTGAATACTGCCCAAGCTCAAGCCCTCTGCTCAT
Fomln_006     ---ACAAATGCT-CGAAGCTGGCTTCCTCAAAAATCTATAAAGATCACC---TTTCTATTCCCCC-CTTGAATACTGCCCAAGCTCAAGCCCTCTGCTCAT
Fomln_012     ---ACAAATGCT-CGAAGCTGGCTTCCTCAAAAATCTATAAAGATCACC---TTTCTATTCCCCC-CTTGAATACTGCCCAAGCTCAAGCCCTCTGCTCAT
Fomln_013     -GACAAATGCT-CGAAGCTGGCTTCCTCAAAAATCTATAAAGATCACC---TTTCTATTCCCCC-CTTGAATACTGCCCAAGCTCAAGCCCTCTGCTCAT
Fomln_001     -GACAAATGCT-CGAAGCTGGCTTCCTCAAAAATCTATAAAGATCACC---TTTCTATTCCCCC-CTTGAATACTGCCCAAGCTCAAGCCCTCTGCTCAT
Fomln_004     -GACAAATGCT-CGAAGCTGGCTTCCTCAAAAATCTATAAAGATCACC---TTTCTATTCCCCC-CTTGAATACTGCCCAAGCTCAAGCCCTCTGCTCAT
Fomln_010     -GACAAATGCT-CGAAGCTGGCTTCCTCAAAAATCTATAAAGATCACC---TTTCTATTCCCCC-CTTGAATACTGCCCAAGCTCAAGCCCTCTGCTCAT
Fomln_005     ---ACAAATGCT-CGAAGCTGGCTTCCTCAAAAATCTATAAAGATCACC---TTTCTATTCCCCC-CTTGAATACTGCCCAAGCTCAAGCCCTCTGCTCAT
Fomln_016     ---ACAAATGCT-CGAAGCTGGCTTCCTCAAAAATCTATAAAGATCACC---TTTCTATTCCCCC-CTTGAATACTGCCCAAGCTCAAGCCCTCTGCTCAT
Fomln_009_0   ---ACAAATGCT-CGAAGCTGGCTTCCTCAAAAATCTATAAAGATCACC---TTTCTATTCCCCC-CTTGAATACTGCCCAAGCTCAAGCCCTCTGCTCAT
Fomln_011_0   -GACAAATGCT-CGAAGCTGGCTTCCTCAAAAATCTATAAAGATCACC---TTTCTATTCCCCC-CTTGAATACTGCCCAAGCTCAAGCCCTCTGCTCAT
Fonic_001     -TAATAACTAT-AGACTTTAGC-----AAATATATAAG-----TTAGTA-----TGTAATTTGTTGAAAGGACCATTGCTGATTGAGGG
Fonic_003     -GAACAAATGCT-CGAACTAGTTTCCCTCAAAAATCTATAAAGCTCACC---TTCCCTA-TCCCCC-CTTCAATGCCGCTCAAGCTCAAGCCCTCGGCTCAT
Fonic_012     -GAACAAATGCT-CGAACTAGTTTCCCTCAAAAATCTATAAAGCTCACC---TTCCCTA-TCCCCC-CTTCAATGCCGCTCAAGCTCAAGCCCTCGGCTCAT
```









Fomln\_009\_1 GAGATC--CCTATGAGGTGGATGGAATTTGCCAGAGTTGACGTACTGCTCCCGGTCATCGAACAGAAAAACGGGCACGAGGTTTCAGCAGATAAATTTG  
Fomln\_011\_1 GAGATC--CCTATGAGGTGGATGGAATTTGCCAGAGTTGACGTACTGCTCCCGGTCATCGAACAGAAAAACGGGCACGAGGTTTCAGCAGATAAATTTG  
Folyc\_069 GAAATC--CCTACGACGTGGATGGAATTTGTCTAGAGTTTACGTACTGCTCCCGGTCATCGAACAGAAAAACGGGCACGAGATTTCAGCAGATAAATTTG  
Folyc\_002 GAAATC--CCTACGACGTGGATGGAATTTGTCTAGAGTTTACGTACTGCTCCCGGTCATCGAACAGAAAAACGGGCACGAGATTTCAGCAGATAAATTTG  
Folyc\_016 GAAATC--CCTACGACGTGGATGGAATTTGTCTAGAGTTTACGTACTGCTCCCGGTCATCGAACAGAAAAACGGGCACGAGATTTCAGCAGATAAATTTG  
Folyc\_038 GAAATC--CCTACGACGTGGATGGAATTTGTCTAGAGTTTACGTACTGCTCCCGGTCATCGAACAGAAAAACGGGCACGAGATTTCAGCAGATAAATTTG  
Folyc\_072 GAAATC--CCTACGACGTGGATGGAATTTGTCTAGAGTTTACGTACTGCTCCCGGTCATCGAACAGAAAAACGGGCACGAGATTTCAGCAGATAAATTTG  
Folyc\_073 GAAATC--CCTACGACGTGGATGGAATTTGTCTAGAGTTTACGTACTGCTCCCGGTCATCGAACAGAAAAACGGGCACGAGATTTCAGCAGATAAATTTG  
Folyc\_074 GAAATC--CCTACGACGTGGATGGAATTTGTCTAGAGTTTACGTACTGCTCCCGGTCATCGAACAGAAAAACGGGCACGAGATTTCAGCAGATAAATTTG  
Folyc\_075 GAAATC--CCTACGACGTGGATGGAATTTGTCTAGAGTTTACGTACTGCTCCCGGTCATCGAACAGAAAAACGGGCACGAGATTTCAGCAGATAAATTTG  
Folyc\_4287 GAAATC--CCTACGACGTGGATGGAATTTGTCTAGAGTTTACGTACTGCTCCCGGTCATCGAACAGAAAAACGGGCACGAGATTTCAGCAGATAAATTTG  
Folyc\_MN25 GAAATC--CCTACGACGTGGATGGAATTTGTCTAGAGTTTACGTACTGCTCCCGGTCATCGAACAGAAAAACGGGCACGAGATTTCAGCAGATAAATTTG  
Folyc\_004 GAAATC--CCTACGACGTGGATGGAATTTGTCTAGAGTTTACGTACTGCTCCCGGTCATCGAACAGAAAAACGGGCACGAGATTTCAGCAGATAAATTTG  
Folyc\_007 GAAATC--CCTACGACGTGGATGGAATTTGTCTAGAGTTTACGTACTGCTCCCGGTCATCGAACAGAAAAACGGGCACGAGATTTCAGCAGATAAATTTG  
Folyc\_014 GAAATC--CCTACGACGTGGATGGAATTTGTCTAGAGTTTACGTACTGCTCCCGGTCATCGAACAGAAAAACGGGCACGAGATTTCAGCAGATAAATTTG  
Folyc\_018 GAAATC--CCTACGACGTGGATGGAATTTGTCTAGAGTTTACGTACTGCTCCCGGTCATCGAACAGAAAAACGGGCACGAGATTTCAGCAGATAAATTTG  
Folyc\_026 GAAATC--CCTACGACGTGGATGGAATTTGTCTAGAGTTTACGTACTGCTCCCGGTCATCGAACAGAAAAACGGGCACGAGATTTCAGCAGATAAATTTG  
Folyc\_029 GAAATC--CCTACGACGTGGATGGAATTTGTCTAGAGTTTACGTACTGCTCCCGGTCATCGAACAGAAAAACGGGCACGAGATTTCAGCAGATAAATTTG  
Focub\_B2 GAGAGG--AATACCAAGCGGATGGAATTTGCCAGAGCTTACGTACTGCTCCGAGGTCATCGAACCGGGACATGAGCACCAGATTTCAGCAGATAAATTTG  
Focub\_II5 GAGAGG--AATACCAAGCGGATGGAATTTGCCAGAGCTTACGTACTGCTCCGAGGTCATCGAACCGGGACATGAGCACCAGATTTCAGCAGATAAATTTG  
Forap\_PHW815\_1 GAGAAA--TGTACAATGCCGATGGAATTTGCCAGAGTTACGTACTGCTCCGAGGTCATCGAACAGAAAAACGGGCACGAGATTTCAGCAGATAAATTTG  
Focoon\_5176 GAGATC--CTTACGAGCGGATGGAATTTGCCAGAGCTTACCCACTGCTCCGAGGTCATCGAACAGAAAAACGGGCACGAGATTTCAGCAGATAAATTTG  
Focoon\_PHW808 GAGATC--CTTACGAGCGGATGGAATTTGCCAGAGCTTACCCACTGCTCCGAGGTCATCGAACAGAAAAACGGGCACGAGATTTCAGCAGATAAATTTG  
Forap\_PHW815\_0 ATAACG--TTTATCTGGCGGATGGAATTTGCCAGAGCTTACGTACTGCTCCCAACCGTCGAACAGGGACATGGGCACGCGATTTCAGCAGATAAATTTG  
Fopis\_HDV247 GAGAGG--TCTACGACGTGGATGGAATTTGCCAGAGCTATACATGCTCCAGCTCAACGAACAGGAACATGGCCATCAGATTTCAGCAGATAAATTTG  
Folag\_001\_0 AAGAGGTTCTTCTATCAAGTGGATGGAATTTGCCAGAGTTGACGTACTGCTCCGAGGTCATCGAACAGATAAATGGGGACGAGGTTTCGCGACGTGATTTG  
Folag\_005\_0 AAGAGGTTCTTCTATCAAGTGGATGGAATTTGCCAGAGTTGACGTACTGCTCCGAGGTCATCGAACAGATAAATGGGGACGAGGTTTCGCGACGTGATTTG  
Folag\_002\_0 AAGAGGTTCTTCTATCAAGTGGATGGAATTTGCCAGAGTTGACGTACTGCTCCGAGGTCATCGAACAGATAAATGGGGACGAGGTTTCGCGACGTGATTTG  
Folag\_004\_0 AAGAGGTTCTTCTATCAAGTGGATGGAATTTGCCAGAGTTGACGTACTGCTCCGAGGTCATCGAACAGATAAATGGGGACGAGGTTTCGCGACGTGATTTG  
Fomom\_001\_0 AAGAGGTTCTTCTATCAAGTGGATGGAATTTGCCAGAGTTGACGTACTGCTCCGAGGTCATCGAACAGATAAATGGGGACGAGGTTTCGCGACGTGATTTG  
Fomom\_004\_0 AAGAGGTTCTTCTATCAAGTGGATGGAATTTGCCAGAGTTGACGTACTGCTCCGAGGTCATCGAACAGATAAATGGGGACGAGGTTTCGCGACGTGATTTG  
Fogla\_G76 GAGATC--CCTACGAGGTGGATGGAATTTGCCAGAGTTGACGTACTGCTCCGAGGTCATCGAACAGGAGAAATGGGCACGAGTTTCAGCAGATAAATTTG  
Fomom\_001\_2 GAGAGG--AGTACGAAGTGGATGGAATTTGCCAGAGTTTACGTACTGCTCCGAGGTCGTCGAAGAGGGACATGAGCAGAGACTCAGGACATAAATTTG  
Fomom\_004\_3 GAGAGG--AGTACGAAGTGGATGGAATTTGCCAGAGTTTACGTACTGCTCCGAGGTCGTCGAAGAGGGACATGAGCAGAGACTCAGGACATAAATTTG  
Fomom\_001\_1 GAGAGG--AGTACGTAGTGGATGGAATTTGCCAGAGTTTACGTACTGCTCCGAGATCGTCCAAAGAGGGACCTGAGCATGAGACTCAGGACATAAATTTG  
Fomom\_004\_1 GAGAGG--AGTACGTAGTGGATGGAATTTGCCAGAGTTTACGTACTGCTCCGAGATCGTCCAAAGAGGGACCTGAGCATGAGACTCAGGACATAAATTTG  
Folil\_39 GAGAGG--AGTACGAAGTGGATGGAATTTGCCAGAGTTTACGTACTGCTCCGAGGTCGTCGAAGAGGGACCTGAGCAGAGACTCAGGACATAAATTTG  
Folag\_001\_1 GAGAGG--AGTACGAAGTGGATGGAATTTGCCAGAGTTTACGTACTGCTCCGAGGTCGTCGAAGAGGGACATGAGCATGAGACTCAGGACATAAATTTG  
Folag\_002\_1 GAGAGG--AGTACGAAGTGGATGGAATTTGCCAGAGTTTACGTACTGCTCCGAGGTCGTCGAAGAGGGACATGAGCATGAGACTCAGGACATAAATTTG  
Folag\_004\_1 GAGAGG--AGTACGAAGTGGATGGAATTTGCCAGAGTTTACGTACTGCTCCGAGGTCGTCGAAGAGGGACATGAGCATGAGACTCAGGACATAAATTTG  
Folag\_005\_1 GAGAGG--AGTACGAAGTGGATGGAATTTGCCAGAGTTTACGTACTGCTCCGAGGTCGTCGAAGAGGGACATGAGCATGAGACTCAGGACATAAATTTG  
Fomom\_001\_3 GAGAGG--AGTACGAAGTGGATGGAATTTGCCAGAGTTTACGTACTGCTCCGAGGTCGTCGAAGAGGGACATGAGCATGAGACTCAGGACATAAATTTG  
Fomom\_004\_2 GAGAGG--AGTACGAAGTGGATGGAATTTGCCAGAGTTTACGTACTGCTCCGAGGTCGTCGAAGAGGGACATGAGCATGAGACTCAGGACATAAATTTG  
Fomln\_006 GAGAGG--AFTACGAAGTGGATGGAATTTGCCAGAGTTTACGTACTGCTCCGAGGTCGTCGAAGAGGGACATGAGCATGAGACTCAGGACATAAATTTG  
Fomln\_012 GAGAGG--AFTACGAAGTGGATGGAATTTGCCAGAGTTTACGTACTGCTCCGAGGTCGTCGAAGAGGGACATGAGCATGAGACTCAGGACATAAATTTG  
Fomln\_013 GAGAGG--AFTACGAAGTGGATGGAATTTGCCAGAGTTTACGTACTGCTCCGAGGTCGTCGAAGAGGGACATGAGCATGAGACTCAGGACATAAATTTG  
Fomln\_001 GAGAGG--AFTACGAAGTGGATGGAATTTGCCAGAGTTTACGTACTGCTCCGAGGTCGTCGAAGAGGGACATGAGCATGAGACTCAGGACATAAATTTG  
Fomln\_004 GAGAGG--AFTACGAAGTGGATGGAATTTGCCAGAGTTTACGTACTGCTCCGAGGTCGTCGAAGAGGGACATGAGCATGAGACTCAGGACATAAATTTG  
Fomln\_010 GAGAGG--AFTACGAAGTGGATGGAATTTGCCAGAGTTTACGTACTGCTCCGAGGTCGTCGAAGAGGGACATGAGCATGAGACTCAGGACATAAATTTG  
Fomln\_005 GAGAGG--AFTACGAAGTGGATGGAATTTGCCAGAGTTTACGTACTGCTCCGAGGTCGTCGAAGAGGGACATGAGCATGAGACTCAGGACATAAATTTG  
Fomln\_016 GAGAGG--AFTACGAAGTGGATGGAATTTGCCAGAGTTTACGTACTGCTCCGAGGTCGTCGAAGAGGGACATGAGCATGAGACTCAGGACATAAATTTG  
Fomln\_009\_0 GAGAGG--AFTACGAAGTGGATGGAATTTGCCAGAGTTTACGTACTGCTCCGAGGTCGTCGAAGAGGGACATGAGCATGAGACTCAGGACATAAATTTG  
Fomln\_011\_0 GAGAGG--AFTACGAAGTGGATGGAATTTGCCAGAGTTTACGTACTGCTCCGAGGTCGTCGAAGAGGGACATGAGCATGAGACTCAGGACATAAATTTG  
Fonic\_001 ACGAAG--AATATGAGGTAGTGGTTGTGCCAGAGCTTACGTACTGCTCCAGGTCCTTGAACAGGGAGATGAGCACGAGGTTTCAGCAGATAAATTTG  
Fonic\_003 GAGAAG--ATTATGAGGCGGATGGA--TTTATCCAGAGCTTACGTATTGCTCCGAGGTCATCGAACAGGGACATTGGCACGAGATTTCAGCAGAAAATTTG  
Fonic\_012 GAGAAG--ATTATGAGGCGGATGGA--TTTATCCAGAGCTTACGTATTGCTCCGAGGTCATCGAACAGGGACATTGGCACGAGATTTCAGCAGAAAATTTG









|                |                    |                       |
|----------------|--------------------|-----------------------|
| Fomln_009_1    | AGGAAGAAAAAGGGCGAC | AAGCACCATGATTCACGTATT |
| Fomln_011_1    | AGGAAGAAAAAGGGCGAC | AAGCACCATGATTCACGTATT |
| Folyc_069      | AGGAAGAGAAGGGCGAC  | AAGCACTATGATTCACGTATT |
| Folyc_002      | AGGAAGAGAAGGGCGAC  | AAGCACTATGATTCACGTATT |
| Folyc_016      | AGGAAGAGAAGGGCGAC  | AAGCACTATGATTCACGTATT |
| Folyc_038      | AGGAAGAGAAGGGCGAC  | AAGCACTATGATTCACGTATT |
| Folyc_072      | AGGAAGAGAAGGGCGAC  | AAGCACTATGATTCACGTATT |
| Folyc_073      | AGGAAGAGAAGGGCGAC  | AAGCACTATGATTCACGTATT |
| Folyc_074      | AGGAAGAGAAGGGCGAC  | AAGCACTATGATTCACGTATT |
| Folyc_075      | AGGAAGAGAAGGGCGAC  | AAGCACTATGATTCACGTATT |
| Folyc_4287     | AGGAAGAGAAGGGCGAC  | AAGCACTATGATTCACGTATT |
| Folyc_MN25     | AGGAAGAGAAGGGCGAC  | AAGCACTATGATTCACGTATT |
| Folyc_004      | AGGAAGAGAAGGGCGAC  | AAGCACTATGATTCACGTATT |
| Folyc_007      | AGGAAGAGAAGGGCGAC  | AAGCACTATGATTCACGTATT |
| Folyc_014      | AGGAAGAGAAGGGCGAC  | AAGCACTATGATTCACGTATT |
| Folyc_018      | AGGAAGAGAAGGGCGAC  | AAGCACTATGATTCACGTATT |
| Folyc_026      | AGGAAGAGAAGGGCGAC  | AAGCACTATGATTCACGTATT |
| Folyc_029      | AGGAAGAGAAGGGCGAC  | AAGCACTATGATTCACGTATT |
| Focub_B2       | AGGAAGATAAAGGGCGAC | AAGCACCATGATTCACGTATT |
| Focub_II5      | AGGAAGATAAAGGGCGAC | AAGCACCATGATTCACGTATT |
| Forap_PHW815_1 | AGGAAGATAAGCGCGAC  | AAGCACCATGATTCACGTATT |
| Focon_5176     | AGGAAGAGAAGGGCGAC  | AAGCACCATGATTCACGTATT |
| Focon_PHW808   | AGGAAGAGAAGGGCGAC  | AAGCACCATGATTCACGTATT |
| Forap_PHW815_0 | AGGAAAACAAGGGCGAC  | AAGCACCATGATTCACGTATT |
| Fopis_HDV247   | AGGAAGATAAAGGGCGAC | AAGCACCATGATTCACGTATT |
| Folag_001_0    | AGGAAAATAAAGGGCGAC | AAGCACCATGATTCACGTATT |
| Folag_005_0    | AGGAAAATAAAGGGCGAC | AAGCACCATGATTCACGTATT |
| Folag_002_0    | AGGAAAATAAAGGGCGAC | AAGCACCATGATTCACGTATT |
| Folag_004_0    | AGGAAAATAAAGGGCGAC | AAGCACCATGATTCACGTATT |
| Fomom_001_0    | AGGAAAATAAAGGGCGAC | AAGCACCATGATTCACGTATT |
| Fomom_004_0    | AGGAAAATAAAGGGCGAC | AAGCACCATGATTCACGTATT |
| Fogla_G76      | AGGAAAATAAAGGGCGAC | AAGCACCATGATTCACGTATT |
| Fomom_001_2    | AGGAAGAGAAGGGCGAC  | -----                 |
| Fomom_004_3    | -----              | -----                 |
| Fomom_001_1    | AGGAAGATAAAGGGCGAC | AAGCACCATGATTCACGTATT |
| Fomom_004_1    | AGGAAGATAAAGGGCGAC | AAGCACCATGATTCACGTATT |
| Folil_39       | AGGAAGATAAAGGGCGAC | AAGCACCATGATTCACGTATT |
| Folag_001_1    | AGGAAGAGAAGGGCGAC  | AAGCACCATGATTCACGTATT |
| Folag_002_1    | AGGAAGAGAAGGGCGAC  | AAGCACCATGATTCACGTATT |
| Folag_004_1    | AGGAAGAGAAGGGCGAC  | AAGCACCATGATTCACGTATT |
| Folag_005_1    | AGGAAGAGAAGGGCGAC  | AAGCACCATGATTCACGTATT |
| Fomom_001_3    | -----              | -----                 |
| Fomom_004_2    | -----              | -----                 |
| Fomln_006      | AGGAAGAGAAGGGCGAC  | AAGCACCATGATTCACGTATT |
| Fomln_012      | AGGAAGAGAAGGGCGAC  | AAGCACCATGATTCACGTATT |
| Fomln_013      | AGGAAGAGAAGGGCGAC  | AAGCACCATGATTCACGTATT |
| Fomln_001      | AGGAAGAGAAGGGCGAC  | AAGCACCATGATTCACGTATT |
| Fomln_004      | AGGAAGAGAAGGGCGAC  | AAGCACCATGATTCACGTATT |
| Fomln_010      | AGGAAGAGAAGGGCGAC  | AAGCACCATGATTCACGTATT |
| Fomln_005      | AGGAAGAGAAGGGCGAC  | AAGCACCATGATTCACGTATT |
| Fomln_016      | AGGAAGAGAAGGGCGAC  | AAGCACCATGATTCACGTATT |
| Fomln_009_0    | AGGAAGAGAAGGGCGAC  | AAGCACCATGATTCACGTATT |
| Fomln_011_0    | AGGAAGAGAAGGGCGAC  | AAGCACCATGATTCACGTATT |
| Fonic_001      | AGGAAGAGAAGGGCGA   | AAGTACCATGATTCACGTATT |
| Fonic_003      | AGGAAGAGAAGGGCGA   | AAGTACCATGATTCACGTATT |
| Fonic_012      | AGGAAGAGAAGGGCGA   | AAGTACCATGATTCACGTATT |



|                |                                     |                                               |                         |
|----------------|-------------------------------------|-----------------------------------------------|-------------------------|
| Fomln_009_1    | TAAAGCCTTAAAAACA                    | AGTTCAAGCAAGAGTTTAAAGCAGCTAAGGACTAAAGAAATTA   | AGGGCTAGTGGCC           |
| Fomln_011_1    | TAAAGCCTTAAAAACA                    | AGTTCAAGCAAGAGTTTAAAGCAGCTAAGGACTAAAGAAATTA   | AGGGCTAGTGGCC           |
| Folyc_069      | TGAGCTCTTGA AAAACA                  | GGTTCAAGTCGAGGCTTTGCAGCGCAAGGACTAAAAAAAATTT   | AATGGCTGGTGGCC          |
| Folyc_002      | TGAGCTCTTGA AAAACA                  | GGTTCAAGTCGAGGCTTTGCAGCGCAAGGACTAAAAAAAATTT   | AATGGCTGGTGGCC          |
| Folyc_016      | TGAGCTCTTGA AAAACA                  | GGTTCAAGTCGAGGCTTTGCAGCGCAAGGACTAAAAAAAATTT   | AATGGCTGGTGGCC          |
| Folyc_038      | TGAGCTCTTGA AAAACA                  | GGTTCAAGTCGAGGCTTTGCAGCGCAAGGACTAAAAAAAATTT   | AATGGCTGGTGGCC          |
| Folyc_072      | TGAGCTCTTGA AAAACA                  | GGTTCAAGTCGAGGCTTTGCAGCGCAAGGACTAAAAAAAATTT   | AATGGCTGGTGGCC          |
| Folyc_073      | TGAGCTCTTGA AAAACA                  | GGTTCAAGTCGAGGCTTTGCAGCGCAAGGACTAAAAAAAATTT   | AATGGCTGGTGGCC          |
| Folyc_074      | TGAGCTCTTGA AAAACA                  | GGTTCAAGTCGAGGCTTTGCAGCGCAAGGACTAAAAAAAATTT   | AATGGCTGGTGGCC          |
| Folyc_075      | TGAGCTCTTGA AAAACA                  | GGTTCAAGTCGAGGCTTTGCAGCGCAAGGACTAAAAAAAATTT   | AATGGCTGGTGGCC          |
| Folyc_4287     | TGAGCTCTTGA AAAACA                  | GGTTCAAGTCGAGGCTTTGCAGCGCAAGGACTAAAAAAAATTT   | AATGGCTGGTGGCC          |
| Folyc_MN25     | TGAGCTCTTGA AAAACA                  | GGTTCAAGTCGAGGCTTTGCAGCGCAAGGACTAAAAAAAATTT   | AATGGCTGGTGGCC          |
| Folyc_004      | TGAGCTCTTGA AAAACA                  | GGTTCAAGTCGAGGCTTTGCAGCGCAAGGACTAAAAAAAATTT   | AATGGCTGGTGGCC          |
| Folyc_007      | TGAGCTCTTGA AAAACA                  | GGTTCAAGTCGAGGCTTTGCAGCGCAAGGACTAAAAAAAATTT   | AATGGCTGGTGGCC          |
| Folyc_014      | TGAGCTCTTGA AAAACA                  | GGTTCAAGTCGAGGCTTTGCAGCGCAAGGACTAAAAAAAATTT   | AATGGCTGGTGGCC          |
| Folyc_018      | TGAGCTCTTGA AAAACA                  | GGTTCAAGTCGAGGCTTTGCAGCGCAAGGACTAAAAAAAATTT   | AATGGCTGGTGGCC          |
| Folyc_026      | TGAGCTCTTGA AAAACA                  | GGTTCAAGTCGAGGCTTTGCAGCGCAAGGACTAAAAAAAATTT   | AATGGCTGGTGGCC          |
| Folyc_029      | TGAGCTCTTGA AAAACA                  | GGTTCAAGTCGAGGCTTTGCAGCGCAAGGACTAAAAAAAATTT   | AATGGCTGGTGGCC          |
| Focub_B2       | TGAGATCTTGA AAAACA                  | GGTTCAAGTCGAGGCTTTGA                          | GGTGGCC                 |
| Focub_II5      | TGAGATCTTGA AAAACA                  | GGTTCAAGTCGAGGCTTTGA                          | GGTGGCC                 |
| Forap_PHW815_1 | TGAGATCTTGA AAAACA                  | GGTTCCAGTCGAGGCTTTGCAGCGCTAAGGACCCCAAAAAAAT   | TAAGGGCTGGTGGCC         |
| Focoon_5176    | TGAGATCTTGA AAAACA                  | GGTTCAAGTCAAGGCTTTGCAGCGCTAAGGACCAAAAAAGATCA  | AGGGCTGGTGGCC           |
| Focoon_PHW808  | TGAGATCTTGA AAAACA                  | GGTTCAAGTCAAGGCTTTGCAGCGCTAAGGACCAAAAAAGATCA  | AGGGCTGGTGGCC           |
| Forap_PHW815_0 | TGAGATCTTGA AAAACA                  | GGTTCAAGTCGAGGCTTTGCAGCGCTAAGGACCAAAAAAGATTTA | AGGGCTGGTGGCC           |
| Fopis_HDV247   | TGAGATCTTGA AAAACA                  | GGTTCAAGTCGAGGCTTTACAGCGCTAAGGACCAAAAAAGATTTA | AGGGCTAGTGGCC           |
| Folag_001_0    | TGAGATCTTGA AAAACA                  | GGTTCAAGTCGAGGCTTTGCAGCGCTAAGGACCAAAAAAGATTTA | AAGGGCTGGTGGCC          |
| Folag_005_0    | TGAGATCTTGA AAAACA                  | GGTTCAAGTCGAGGCTTTGCAGCGCTAAGGACCAAAAAAGATTTA | AAGGGCTGGTGGCC          |
| Folag_002_0    | TGAGATCTTGA AAAACA                  | GGTTCAAGTCGAGGCTTTGCAGCGCTAAGGACCAAAAAAGATTTA | AAGGGCTGGTGGCC          |
| Folag_004_0    | TGAGATCTTGA AAAACA                  | GGTTCAAGTCGAGGCTTTGCAGCGCTAAGGACCAAAAAAGATTTA | AAGGGCTGGTGGCC          |
| Fomom_001_0    | TGAGATCTTGA AAAACA                  | GGTTCAAGTCGAGGCTTTGCAGCGCTAAGGACCAAAAAAGATTTA | AAGGGCTGGTGGCC          |
| Fomom_004_0    | TGAGATCTTGA AAAACA                  | GGTTCAAGTCGAGGCTTTGCAGCGCTAAGGACCAAAAAAGATTTA | AAGGGCTGGTGGCC          |
| Fogla_G76      | TGAGATCTTGA AAAACAAGGTTTAAAGTCGAGGG | GGTTCAAGTCGAGGCTTTGCAGCGCTAAGGACCAAAAAAATAA   | AGGGCTGGT               |
| Fomom_001_2    | TGAGGTCTTGA AAAACA                  | GGTTCAAGTTGAGGCTTTGCAGCGCTAAGGACCAAAAAAATAA   | AATAAAAATAAGGGCTGGTGGCC |
| Fomom_004_3    |                                     |                                               |                         |
| Fomom_001_1    | TGAGTTCTTGA AAAACA                  | GGTTCAACTCGAGGCTTTGCAGCGCTAAGGACCAAAAAAATAA   | AATAAAAATAAGGGCTGGTGGCC |
| Fomom_004_1    | TGAGTTCTTGA AAAACA                  | GGTTCAACTCGAGGCTTTGCAGCGCTAAGGACCAAAAAAATAA   | AATAAAAATAAGGGCTGGTGGCC |
| Folil_39       | TGAGGTCTTGA AAAACA                  | GGTTCAACTCGAGGCTTTGCAGCGCTAAGGACCAAAAAAATAA   | AATAAAAATAAGGGCTGGTGGCC |
| Folag_001_1    | TGAGGTCTTGA AAAACA                  | GGTTCAAGTTGAGGCTTTGCAGCGCTAAGGACCAAAAAAATAA   | AATAAAAATAAGGGCTGGTGGCC |
| Folag_002_1    | TGAGGTCTTGA AAAACA                  | GGTTCAAGTTGAGGCTTTGCAGCGCTAAGGACCAAAAAAATAA   | AATAAAAATAAGGGCTGGTGGCC |
| Folag_004_1    | TGAGGTCTTGA AAAACA                  | GGTTCAAGTTGAGGCTTTGCAGCGCTAAGGACCAAAAAAATAA   | AATAAAAATAAGGGCTGGTGGCC |
| Folag_005_1    | TGAGGTCTTGA AAAACA                  | GGTTCAAGTTGAGGCTTTGCAGCGCTAAGGACCAAAAAAATAA   | AATAAAAATAAGGGCTGGTGGCC |
| Fomom_001_3    |                                     |                                               |                         |
| Fomom_004_2    |                                     |                                               |                         |
| Fomln_006      | TGAGGTCTTGA AAAACA                  | GGTTCAAGTTGAGGCTTTGCAGCGCTAAGGACCAAAAAAATAA   | AATAAAAATAAGGGCTGGTGGCC |
| Fomln_012      | TGAGGTCTTGA AAAACA                  | GGTTCAAGTTGAGGCTTTGCAGCGCTAAGGACCAAAAAAATAA   | AATAAAAATAAGGGCTGGTGGCC |
| Fomln_013      | TGAGGTCTTGA AAAACA                  | GGTTCAAGTTGAGGCTTTGCAGCGCTAAGGACCAAAAAAATAA   | AATAAAAATAAGGGCTGGTGGCC |
| Fomln_001      | TGAGGTCTTGA AAAACA                  | GGTTCAAGTTGAGGCTTTGCAGCGCTAAGGACCAAAAAAATAA   | AATAAAAATAAGGGCTGGTGGCC |
| Fomln_004      | TGAGGTCTTGA AAAACA                  | GGTTCAAGTTGAGGCTTTGCAGCGCTAAGGACCAAAAAAATAA   | AATAAAAATAAGGGCTGGTGGCC |
| Fomln_010      | TGAGGTCTTGA AAAACA                  | GGTTCAAGTTGAGGCTTTGCAGCGCTAAGGACCAAAAAAATAA   | AATAAAAATAAGGGCTGGTGGCC |
| Fomln_005      | TGAGGTCTTGA AAAACA                  | GGTTCAAGTTGAGGCTTTGCAGCGCTAAGGACCAAAAAAATAA   | AATAAAAATAAGGGCTGGTGGCC |
| Fomln_016      | TGAGGTCTTGA AAAACA                  | GGTTCAAGTTGAGGCTTTGCAGCGCTAAGGACCAAAAAAATAA   | AATAAAAATAAGGGCTGGTGGCC |
| Fomln_009_0    | TGAGGTCTTGA AAAACA                  | GGTTCAAGTTGAGGCTTTGCAGCGCTAAGGACCAAAAAAATAA   | AATAAAAATAAGGGCTGGTGGCC |
| Fomln_011_0    | TGAGGTCTTGA AAAACA                  | GGTTCAAGTTGAGGCTTTGCAGCGCTAAGGACCAAAAAAATAA   | AATAAAAATAAGGGCTGGTGGCC |
| Fonic_001      | TGAGGTCTTGA AAAACA                  | TGTATAGGTCGAGGCTTTGCAGCGATTAAGGACGAAGAAATTT   | AAGAGCTGATGGCC          |
| Fonic_003      | TGAGGTCTTGA AAAACA                  | TGTATAGGTCGAGGCTTTGCAGCGATTAAGGACGAAGAAATTT   | AAGAGCTGATGGCC          |
| Fonic_012      | TGAGGTCTTGA AAAACA                  | TGTATAGGTCGAGGCTTTGCAGCGATTAAGGACGAAGAAATTT   | AAGAGCTGATGGCC          |

|                |                                                                                            |
|----------------|--------------------------------------------------------------------------------------------|
| Fomln_009_1    | TACCATCCAGGACCACCTAGTGGGCACCCCACTAAT--GGACCAAAAATTTCAATCTTC-----CCATACAAAATCCAAA-----      |
| Fomln_011_1    | TACCATCCAGGACCACCTAGTGGGCACCCCACTAAT--GGACCAAAAATTTCAATCTTC-----CCATACAAAATCCAAA-----      |
| Folyc_069      | CACTTTCAACAA-----GGCA-GCCACGGGA-GACTT-GAGAT-CAGGCTTGC-----TAATCAATCAACGGGTTTCAA            |
| Folyc_002      | CACTTTCAACAA-----GGCA-GCCACGGGA-GACTT-GAGAT-CAGGCTTGC-----TAATCAATCAACGGGTTTCAA            |
| Folyc_016      | CACTTTCAACAA-----GGCA-GCCACGGGA-GACTT-GAGAT-CAGGCTTGC-----TAATCAATCAACGGGTTTCAA            |
| Folyc_038      | CACTTTCAACAA-----GGCA-GCCACGGGA-GACTT-GAGAT-CAGGCTTGC-----TAATCAATCAACGGGTTTCAA            |
| Folyc_072      | CACTTTCAACAA-----GGCA-GCCACGGGA-GACTT-GAGAT-CAGGCTTGC-----TAATCAATCAACGGGTTTCAA            |
| Folyc_073      | CACTTTCAACAA-----GGCA-GCCACGGGA-GACTT-GAGAT-CAGGCTTGC-----TAATCAATCAACGGGTTTCAA            |
| Folyc_074      | CACTTTCAACAA-----GGCA-GCCACGGGA-GACTT-GAGAT-CAGGCTTGC-----TAATCAATCAACGGGTTTCAA            |
| Folyc_075      | CACTTTCAACAA-----GGCA-GCCACGGGA-GACTT-GAGAT-CAGGCTTGC-----TAATCAATCAACGGGTTTCAA            |
| Folyc_4287     | CACTTTCAACAA-----GGCA-GCCACGGGA-GACTT-GAGAT-CAGGCTTGC-----TAATCAATCAACGGGTTTCAA            |
| Folyc_MN25     | CACTTTCAACAA-----GGCA-GCCACGGGA-GACTT-GAGAT-CAGGCTTGC-----TAATCAATCAACGGGTTTCAA            |
| Folyc_004      | CACTTTCAACAA-----GGCA-GCCACGGGA-GACTT-GAGAT-CAGGCTTGC-----TAATCAATCAACGGGTTTCAA            |
| Folyc_007      | CACTTTCAACAA-----GGCA-GCCACGGGA-GACTT-GAGAT-CAGGCTTGC-----TAATCAATCAACGGGTTTCAA            |
| Folyc_014      | CACTTTCAACAA-----GGCA-GCCACGGGA-GACTT-GAGAT-CAGGCTTGC-----TAATCAATCAACGGGTTTCAA            |
| Folyc_018      | CACTTTCAACAA-----GGCA-GCCACGGGA-GACTT-GAGAT-CAGGCTTGC-----TAATCAATCAACGGGTTTCAA            |
| Folyc_026      | CACTTTCAACAA-----GGCA-GCCACGGGA-GACTT-GAGAT-CAGGCTTGC-----TAATCAATCAACGGGTTTCAA            |
| Folyc_029      | CACTTTCAACAA-----GGCA-GCCACGGGA-GACTT-GAGAT-CAGGCTTGC-----TAATCAATCAACGGGTTTCAA            |
| Focub_B2       | CACTTTCAACAA-----GGCA-GCTAC-----CAT-GCAGTACCCACCTGCCGTA-----CGTACCCACCTACCTACACCAA         |
| Focub_II5      | CACTTTCAACAA-----GGCA-GCTACCAT-----GCAGTACCCACCTGCCGTA-----CGTACCCACCTACCTACACCAA          |
| Forap_PHW815_1 | CACTTTCAACAA-----GGCA-GCCACTGGACTGGAGACTTGAGGATACCGGTATGCGGTTG-----CCTATTGGGCAGTGGAT       |
| Focoon_5176    | CACTTTCAACAA-----GGCA-GCCACTGGA-----GACTTGAGAGATACCGGTATGCGGTTGCTCA-----AATATTGGGGTAAAAATC |
| Focoon_PHW808  | CACTTTCAACAA-----GGCA-GCCACTGGA-----GACTTGAGAGATACCGGTATGCGGTTGCTCA-----AATATTGGGGTAAAAATC |
| Forap_PHW815_0 | CACTTTCAACAA-----GGCA-GCCACTGGA-----GACTT-GAGATACCGGTATGCGATTG-----CCAATTCCGGCAGTAAAT      |
| Fopis_HDV247   | CACTTTCAACAA-----GGCA-GCCACTGGA-----GACTTGAGAGATACCGGTATGCGGTTG-----CCTATTCCGGCAGTGGAT     |
| Folag_001_0    | CACTTTCAACAA-----GGCA-GCCACTGGA-----GACTT-GAGATACCGGTATGCGGTTG-----TATATTCCGACAGGGGAC      |
| Folag_005_0    | CACTTTCAACAA-----GGCA-GCCACTGGA-----GACTT-GAGATACCGGTATGCGGTTG-----TATATTCCGACAGGGGAC      |
| Folag_002_0    | CACTTTCAACAA-----GGCA-GCCACTGGA-----GACTT-GAGATACCGGTATGCGGTTG-----TATATTCCGACAGGGGAC      |
| Folag_004_0    | CACTTTCAACAA-----GGCA-GCCACTGGA-----GACTT-GAGATACCGGTATGCGGTTG-----TATATTCCGACAGGGGAC      |
| Fomom_001_0    | CACTTTCAACAA-----GGCA-GCCACTGGA-----GACTT-GAGATACCGGTATGCGGTTG-----TATATTCCGACAGGGGAC      |
| Fomom_004_0    | CACTTTCAACAA-----GGCA-GCCACTGGA-----GACTT-GAGATACCGGTATGCGGTTG-----TATATTCCGACAGGGGAC      |
| Fogla_G76      | -----CACTGGA-----GACTT-GAGATACCGGTATGCGGTTG-----CCTATTCCGGCAGTGGAT                         |
| Fomom_001_2    | CACTTTCAACAA-----GGCA-GC-----                                                              |
| Fomom_004_3    | -----                                                                                      |
| Fomom_001_1    | CACTTTCAACAA-----GGCA-GCCACTGGA-----GACTT-GAGATACCGGTATGCGGTTG-----CCTATTCCGGTGGTGGAT      |
| Fomom_004_1    | CACTTTCAACAA-----GGCA-GCCACTGGA-----GACTT-GAGATACCGGTATGCGGTTG-----CCTATTCCGGTGGTGGAT      |
| Folil_39       | CACTTTCAACAA-----GGCA-GCCACTGGA-----GACTT-GAGATACCGGTATGCGGTTG-----CCTATTCCGGTGGTGGAT      |
| Folag_001_1    | CACTTTCAACAA-----GGCA-GCCACTGGA-----GACTT-GAGATACTGGTATGCGGTTGCCATTGCCCTATTCGGGTGGTGGAT    |
| Folag_002_1    | CACTTTCAACAA-----GGCA-GCCACTGGA-----GACTT-GAGATACTGGTATGCGGTTGCCATTGCCCTATTCGGGTGGTGGAT    |
| Folag_004_1    | CACTTTCAACAA-----GGCA-GCCACTGGA-----GACTT-GAGATACTGGTATGCGGTTGCCATTGCCCTATTCGGGTGGTGGAT    |
| Folag_005_1    | CACTTTCAACAA-----GGCA-GCCACTGGA-----GACTT-GAGATACTGGTATGCGGTTGCCATTGCCCTATTCGGGTGGTGGAT    |
| Fomom_001_3    | -----                                                                                      |
| Fomom_004_2    | -----                                                                                      |
| Fomln_006      | CACTTTCAACAA-----GGCA-GCCACTGGA-----GACTT-GAGATACTGGTATGCGGTTGCCATTGCCCTATTCGGGTGGTGGAT    |
| Fomln_012      | CACTTTCAACAA-----GGCA-GCCACTGGA-----GACTT-GAGATACTGGTATGCGGTTGCCATTGCCCTATTCGGGTGGTGGAT    |
| Fomln_013      | CACTTTCAACAA-----GGCA-GCCACTGGA-----GACTT-GAGATACTGGTATGCGGTTGCCATTGCCCTATTCGGGTGGTGGAT    |
| Fomln_001      | CACTTTCAACAA-----GGCA-GCCACTGGA-----GACTT-GAGATACTGGTATGCGGTTGCCATTGCCCTATTCGGGTGGTGGAT    |
| Fomln_004      | CACTTTCAACAA-----GGCA-GCCACTGGA-----GACTT-GAGATACTGGTATGCGGTTGCCATTGCCCTATTCGGGTGGTGGAT    |
| Fomln_010      | CACTTTCAACAA-----GGCA-GCCACTGGA-----GACTT-GAGATACTGGTATGCGGTTGCCATTGCCCTATTCGGGTGGTGGAT    |
| Fomln_005      | CACTTTCAACAA-----GGCA-GCCACTGGA-----GACTT-GAGATACTGGTATGCGGTTGCCATTGCCCTATTCGGGTGGTGGAT    |
| Fomln_016      | CACTTTCAACAA-----GGCA-GCCACTGGA-----GACTT-GAGATACTGGTATGCGGTTGCCATTGCCCTATTCGGGTGGTGGAT    |
| Fomln_009_0    | CACTTTCAACAA-----GGCA-GCCACTGGA-----GACTT-GAGATACTGGTATGCGGTTGCCATTGCCCTATTCGGGTGGTGGAT    |
| Fomln_011_0    | CACTTTCAACAA-----GGCA-GCCACTGGA-----GACTT-GAGATACTGGTATGCGGTTGCCATTGCCCTATTCGGGTGGTGGAT    |
| Fonic_001      | CGCTTTGAA-----GGCA-GCCGCTGGA-----GACGGAAGAGAT-----GCGGTTG-----CATATTCCGCGCAGTAGAT          |
| Fonic_003      | CGCTTTGAA-----GGCA-GCCGCTGGA-----GACGGAAGAGAT-----GCGGTTG-----CATATTCCGCGCAGTAGAT          |
| Fonic_012      | CGCTTTGAA-----GGCA-GCCGCTGGA-----GACGGAAGAGAT-----GCGGTTG-----CATATTCCGCGCAGTAGAT          |

```

Fomln_009_1 -----TATTGATGTCCG-----
Fomln_011_1 -----TATTGATGTCC-----
Folyc_069 -----TATTGAATGCAATATTGATTCA-----
Folyc_002 -----TATTGAATGCAATATTGATTCA-----
Folyc_016 -----TATTGAATGCAATATTGATTCA-----
Folyc_038 -----TATTGAATGCAATATTGATTCA-----
Folyc_072 -----TATTGAATGCAATATTGATTCA-----
Folyc_073 -----TATTGAATGCAATATTGATTCA-----
Folyc_074 -----TATTGAATGCAATATTGATTCA-----
Folyc_075 -----TATTGAATGCAATATTGATTCA-----
Folyc_4287 -----TATTGAATGCAATATTGATTCA-----
Folyc_MN25 -----TATTGAATGCAATATTGATTCA-----
Folyc_004 -----TATTGAATGCAATATTGATTCAA-----
Folyc_007 -----TATTGAATGCAATATTGATTCAA-----
Folyc_014 -----TATTGAATGCAATATTGATTCAA-----
Folyc_018 -----TATTGAATGCAATATTGATTCAA-----
Folyc_026 -----TATTGAATGCAATATTGATTCAA-----
Folyc_029 -----TATTGAATGCAATATTGATTCAA-----
Focub_B2 -----AAAAGATTTTCCCATAACAAAATGCCAATTTCACTTATGATGAGAAAATGTC-----
Focub_II5 -----AAAAGATTTTCCCATAACAAAATGCCAATTTCACTTATGATGAGAAAATGTC-----
Forap_PHW815_1 -----TATGGAAGCTCC-----
Focon_5176 -----TGTCTTCTCCTT-----
Focon_PHW808 -----TGTCTTCTCCTT-----
Forap_PHW815_0 -----TATGGAAGCTCCAACAGCAAT-----
Fopis_HDV247 -----TATGGAAGCTCCAACAGCA-----
Folag_001_0 -----TATGGAAGCCTCAACAGCAA-----
Folag_005_0 -----TATGGAAGCCTCAACAGCAA-----
Folag_002_0 -----TATGGAAGCCTCAACAGCA-----
Folag_004_0 -----TATGGAAGCCTCAACAGCA-----
Fomom_001_0 -----TATGGAAGCCTCAACAGCA-----
Fomom_004_0 -----TATGGAAGCCTCAACAGCA-----
Fogla_G76 -----TATGGAAGCTCCAACAGCAACTCGA-----
Fomom_001_2 -----
Fomom_004_3 -----
Fomom_001_1 -----TTTGGA-----
Fomom_004_1 -----TTTGGA-----
Folil_39 -----TTTGGA-----
Folag_001_1 -----TATG-----
Folag_002_1 -----TATG-----
Folag_004_1 -----TATG-----
Folag_005_1 -----TATG-----
Fomom_001_3 -----
Fomom_004_2 -----
Fomln_006 -----TATG-----
Fomln_012 -----TATG-----
Fomln_013 -----TAT-----
Fomln_001 -----TAT-----
Fomln_004 -----TAT-----
Fomln_010 -----TAT-----
Fomln_005 -----TATG-----
Fomln_016 -----TATG-----
Fomln_009_0 -----TATG-----
Fomln_011_0 -----TAT-----
Fonic_001 -----TATGGAAGCTTCAACAGCAACTATTCCGAG-----
Fonic_003 -----TATGGAAGCTTCAAC-----
Fonic_012 -----TATGGAAGCTTCAAC-----

```









801

```
Fopis_HDV247 ATAGTAAGTCGCCCAACCTAGTTATGGCCAC  
Fomln_010 -----  
Foniv_015 GATGTTATTGGATTGGATTGGAGCTGG----  
Foniv_019 GATGTTATTGGATTGGATTGGAGCTGG----  
Foniv_037 GATGTTATTGGATTGGATTGGAGCTGG----  
Foniv_005 GATGTTATTGGATTGGATTGGAGCTGGAT---  
Foniv_010 GATGTTATTGGATTGGATTGGAGCTGGAT---  
Foniv_013 GATGTTATTGGATTGGATTGGAGCTGGAT---  
Foniv_020 GATGTTATTGGATTGGATTGGAGCTGGAT---  
Foniv_021 GATGTTATTGGATTGGATTGGAGCTGGAT---  
Foniv_002 GATGTTATTGGATTGGATTGGAGCTGGA----
```









```

Foniv_002_1  TATC--GCCTAGTATGACACCTTAAGACTCTTCTAATATACCATGCAGTACC--CACCCACCTACC-----
Fopis_HDV247 TATC--GCCTAGTATGACACCTTAAGACTCTTCTAATATACCATGCAGTACC--CACCCACCTACC-----
Forcu_031     TATG--GCCTAGTATAACGCCTTACGATGCTGCTAATATCTCTTTAAGTGCT--ATAGC-----
Focuc_015
Focuc_035
Forcu_024
Fomom_004_1  TATG--GCCTAGTATAACGCCTTACGATGCTGCTAATATCTCTTTAAGTGCT--ATAGCTCTCCAGCGG-----
AGTGAATATTCAGA-----TGGAACCTGAGTGC AAAGATCTTTAAGTTTT--AACTTTT-----
Folag_001    TATG--GCCTAGTATAACGCCTTACGATGCTGCTAATATCTCTTTAAGTGCT--ATAGCTCTCCAGCGGG-----
Folag_004    TATG--GCCTAGTATAACGCCTTACGATGCTGCTAATATCTCTTTAAGTGCT--ATAGCTCTCCAGCGGG-----
Folag_005    TATG--GCCTAGTATAACGCCTTACGATGCTGCTAATATCTCTTTAAGTGCT--ATAGCTCTCCAGCGGG-----
Folag_002    TATG--GCCTAGTATAACGCCTTACGATGCTGCTAATATCTCTTTAAGTGCT--ATAGCTCTCCAGCGG-----
Foniv_020_0
Foniv_005    ACTATTAGTCCAGACTACAATCCAAGATCAATAATCAATCCACGACTGGCGTTCATGGATTGATGACTAG-----
Foniv_013_0
Fovas_NRR125433 ACTATTAGTCCAGACTACAATCCAAGATCAATAATCAATCCACGACTGGCGTTCATGGATTGATGACTA-----
Focuc_030_1  -----TTTGATGCTG-----
Foniv_010_1
Focuc_021
Fomln_005_0  TATG--GCCTAGTATAACGCCTTACGATGCTGCTAATATCTCTTTAAGTGCT--ATAGCCCTCCAGCGGG-----
CATGCTTGCTGATCCATAAGCTTATCGTGC-----ACATTATTCAAACCTTAT-----
Fomln_011_1  TGTG--GATCAGTA-----CACTGTGCGGCTAAAAATAGCTTA--CCCT--ATAGAATCTAAGCACGTAAATAAATTAGC-----
Fomln_010    TATG--GCCTAGTATAACGCCTTACGATGCTGCTAATATCTCTTTAAGTGCT--ATAGCTCTCCAGCGG-----
Fomln_011_0  TATG--GCCTAGTATAACGCCTTACGATGCTGCTAATATCTCTTTAAGTGCT--ATAGCTCTCCAGCGG-----
Fomln_012    TATG--GCCTAGTATAACGCCTTACGATGCTGCTAATATCTCTTTAAGTGCT--ATAGCTCTCCAGCGG-----
Foniv_013_1
Foniv_019    TATG--GCCTAGTATAACGCCTTACGATGCTGCTAATATCTCTTTAAGTGCT--ATAGCTCTCCAGCGG-----
Focuc_018_0  TATG--GCCTAGTATAACGCCTTACGATGCTGCTAATATCTCTTTAAGTGCT--ATAGCTCTCCAGCGGG-----
Foluf_001_0  TATG--GCCTAGTATAACGCCTTACGATGCTGCTAATATCTCTTTAAGTGCT--ATAGCTCTCCAGCGGG-----
Foluf_002_0  TATG--GCCTAGTATAACGCCTTACGATGCTGCTAATATCTCTTTAAGTGCT--ATAGCTCTCCAGCGGG-----
Fomln_001    TATG--GCCTAGTATAACGCCTTACGATGCTGCTAATATCTCTTTAAGTGCT--ATAGCTCTCCAGCGGG-----
Fomln_004    TATG--GCCTAGTATAACGCCTTACGATGCTGCTAATATCTCTTTAAGTGCT--ATAGCTCTCCAGCGGG-----
Fomln_005_1  TATG--GCCTAGTATAACGCCTTACGATGCTGCTAATATCTCTTTAAGTGCT--ATAGCTCTCCAGCGGG-----
Fomln_006    TATG--GCCTAGTATAACGCCTTACGATGCTGCTAATATCTCTTTAAGTGCT--ATAGCTCTCCAGCGGG-----
Fomln_009    TATG--GCCTAGTATAACGCCTTACGATGCTGCTAATATCTCTTTAAGTGCT--ATAGCTCTCCAGCGGG-----
Fomln_013    TATG--GCCTAGTATAACGCCTTACGATGCTGCTAATATCTCTTTAAGTGCT--ATAGCTCTCCAGCGGG-----
Fomln_016    TATG--GCCTAGTATAACGCCTTACGATGCTGCTAATATCTCTTTAAGTGCT--ATAGCTCTCCAGCGGG-----
Foniv_002_0  TATG--GCCTAGTATAACGCCTTACGATGCTGCTAATATCTCTTTAAGTGCT--ATAGCTCTCCAGCGGG-----
Foniv_015    TATG--GCCTAGTATAACGCCTTACGATGCTGCTAATATCTCTTTAAGTGCT--ATAGCTCTCCAGCGGG-----
Foniv_037
Focuc_013
Focuc_037
Forcu_016
Focuc_011
Foniv_010_0  TATG--GCCTAGTATAACGCCTTACGATGCTGCTAATATCTCTTTAAGTGCT--ATAGCTCTCCAGCGGG-----
Foniv_020_1  TATG--GCCTAGTATAACGCCTTACGATGCTGCTAATATCTCTTTAAGTGCT--ATAGCCCTCCAGCGGG-----
Fomom_004_0  TATG--GCCTAGTATAACGCCTTACGATGCTGCTAATATCTCTTTAAGTGCT--ATAGCCCTCCAGCGGG-----
Foluf_002_1  TATG--GCCTAGTATAACGCCTTACGATGCTGCTAATATCTCTTTAAGTGCT--ATAGCCCTCCAGCGGG-----
Focuc_018_1  TATG--GCCTAGTATAACGCCTTACGATGCTGCTAATATCTCTTTAAGTGCT--ATAGCCCTCCAGCGG-----
Focuc_030_0  TATG--GCCTAGTATAACGCCTTACGATGCTGCTAATATCTCTTTAAGTGCT--ATAGCCCTCCAGCGG-----
Foluf_001_1  TATG--GCCTAGTATAACGCCTTACGATGCTGCTAATATCTCTTTAAGTGCT--ATAGCCCTCCAGCGG-----

```





```
Fogla_G76 ACACGAAGAATCTTTAATCTGGTTC TAAAGATGCATTGCGGAAGTTTGTTC AATGCC-----
Focuc_001 ACACGAAGAATCTTTAATCTGGTTC TAAAGATGCATTGCGGAAGTTTGTTC AATGCC-----
Focuc_035 ACACGAAGAATCTTTAATCTGGTTC TAAAGATGCATTGCGGAAGTTTGTTC AATGCC-----
Focuc_037 ACACGAAGAATCTTTAATCTGGTTC TAAAGATGCATTGCGGAAGTTTGTTC AATGCC-----
Forcu_016 ACACGAAGAATCTTTAATCTGGTTC TAAAGATGCATTGCGGAAGTTTGTTC AATGCC-----
Focuc_011 ACACGAAGAATCTTTAATCTGGTTC TAAAGATGCATTGCGGAAGTTTGTTC AATGCCA-----
Focuc_013 ACACGAAGAATCTTTAATCTGGTTC TAAAGATGCATTGCGGAAGTTTGTTC AATGCCA-----
Focuc_015 ACACGAAGAATCTTTAATCTGGTTC TAAAGATGCATTGCGGAAGTTTGTTC AATGCCA-----
Forcu_024 ACACGAAGAATCTTTAATCTGGTTC TAAAGATGCATTGCGGAAGTTTGTTC AATGCCA-----
Forcu_031 ACACGAAGAATCTTTAATCTGGTTC TAAAGATGCATTGCGGAAGTTTGTTC AATGCCA-----
Focuc_021 ACACGAAGAATCTTTAATCTGGTTC TAAAGATGCATTGCGGAAGTTTGTTC AATGCC-----
Focuc_030 ACACGAAGAATCTTTAATCTGGTTC TAAAGATGCATTGCGGAAGTTTGTTC AATGCC-----
Focuc_018 ACACGAAGAATCTTTAATCTGGTTC TAAAGATGCATTGCGGAAGTTTGTTC AATGCCA-----
Fomln_010 ACACGAAGAATCTTTAATCTGGTTC TAAAGATGCATTGCGGAAGTTTGTTC AATGCCA-----
Fomom_001 ACACGAAGAATCTTTAATATGGTTC TAAAGATGCATTGCGGAAGTTTGTTC AATGCCAAAAG
Fomom_004 ACACGAAGAATCTTTAATATGGTTC TAAAGATGCATTGCGGAAGTTTGTTC AATGCCAAA--
Fonic_010 ACACGAAGAATCTTTAAT-----
Fonic_012 ACACGAAGAATCTTTAAT-----
Fonic_001 ACACGAAGAATCTTTAA-----
Fonic_003 ACACGAAGAATCTTTAA-----
```

```
1
Fomom_001 ATCCTCAC-----CGTCACTAAACCCCTTCTCCCGCTGATACACAATATCACTTTGATTCCTCGTTACCAGTTTCTACGCTTCGAGGATGGTA TGA
Fomom_004 ATCCTCAC-----CGTCACTAAACCCCTTCTCCCGCTGATACACAATATCACTTTGATTCCTCGTTACCAGTTTCTACGCTTCGAGGATGGTA TGA
Fopis_HDV247 TTACCGAAAGGGGGGGTTGCCGAAAGGG-----GGTGGGCATGGTATCACTTTGATTCCTCGTTACCAGTTTCTACGCTTCGAGGATGGCATGA
Forap_PHW815 ATCCTCAC-----AGTCACTAAACCCCTTCTCCCGCTGATACACAATATCACTTTGATTCCTCGTTACCAGTTTCTACGCTTCGAGGATGGTATGA

101
Fomom_001 GAGGGAGCGCCGGAAGAGGCTTCGGTCCGAGGGAATAAGCCAGTACGCTGACTTCTATGACCCGCTATTGGCGACAAGCTGGGGCGTGACTCTTTTGTT
Fomom_004 GAGGGAGCGCCGGAAGAGGCTTCGGTCCGAGGGAATAAGCCAGTACGCTGACTTCTATGACCCGCTATTGGCGACAAGCTGGGGCGTGACTCTTTTGTT
Fopis_HDV247 GAGGGAGCGCCGGAAGAGGCTTCGGTCCGAGGGAATAAGCCAGTACGCTGACTTCTATGACCCGCTATTGGCGACAAGCTGGGGCGTGACTCTTTTGTT
Forap_PHW815 GAGGGAGCGCCGGAAGAGGCTTCGGTCCGAGGGAATAAGCCAGTACGCTGACTTCTATGACCCGCTATTGGCGACAAGCTGGGGCGTGACTCTTTTGTT

201
Fomom_001 GACTACGATCAAGTCATCAACAGCTTCTCCCTCCCAAGATGGTGGGGAACGAAGTTCTGTCAAGCATTACGTGTATTCCGTCATTGATGCAGATTCCG
Fomom_004 GACTACGATCAAGTCATCAACAGCTTCTCCCTCCCAAGATGGTGGGGAACGAAGTTCTGTCAAGCATTACGTGTATTCCGTCATTGATGCAGATTCCG
Fopis_HDV247 GACTACGATCAAGTCATCAACTGCTTCTCCCTCCCAAGATGGTGGGGAACGAAGTTCTGTCAAGCATTACGTGTATTCCGTCATTGATGCAGATTCCG
Forap_PHW815 GACTACGATCAAGTCATCAACTGCTTCTCCCTCCCAAGATGGTGGGGAACGAAGTTCTGTCAAGCATTACGTGTATTCCGTCATTGATGCAGATTCCG

301
Fomom_001 TATATTCATCTTGCCCTCTGTTGGATTCTGCCCTTAGAGGTTTTACCATTTCGGTGTAACTTAAAGTATCCCTGCTTGCACGTAATTTGATTGATT
Fomom_004 TATATTCATCTTGCCCTCTGTTGGATTCTGCCCTTAGAGGTTTTACCATTTCGGTGTAACTTAAAGTATCCCTGCTTGCACGTAATTTGATTGATT
Fopis_HDV247 TATATTCATCTTGCCCTCTGTTGAATTTCTGCCCTTAGAGGTTTTACCATTTCGGTGTAACTTAAAGTATCCCTGCTTGCACGTAAC---ACCCAGTT
Forap_PHW815 TATATTCATCTTGCCCTCTGTTGAATTTCTGCCCTTAGAGGTTTTACCATTTCGGTGTAGTCTTAAAGTATCCCTGCTTGCACGTAAC---ACCCAGTT

401
Fomom_001 TGATTTGATTTGATTATCCTACGGGTT-----GTAGTCGTCTAAA-----CGACTATGCCGGGATAACGGGGTCCGGCGAAC
Fomom_004 TGATTTGATTTGATTATCCTACGGGTT-----GTAGTCGTCTAAA-----CGACTATGCCGGGATAACGGGGTCCGGCGAAC
Fopis_HDV247 C--CTTATTCTTACGGCCCT-CGCGGTTACGTACGTGGTCTCCACAAATTTCCACCAACCATGGAAGGATCA-----CCAGCA---
Forap_PHW815 C--CTTATTCTTATGACCCCT-CGCGGTTACGTACGTGGTCTCCACAAATTTCCACCAACCATGGAAGGATCA-----CCAGCA---
```

fp7319 fwd> Fomom

fp7336 rev< Fomom

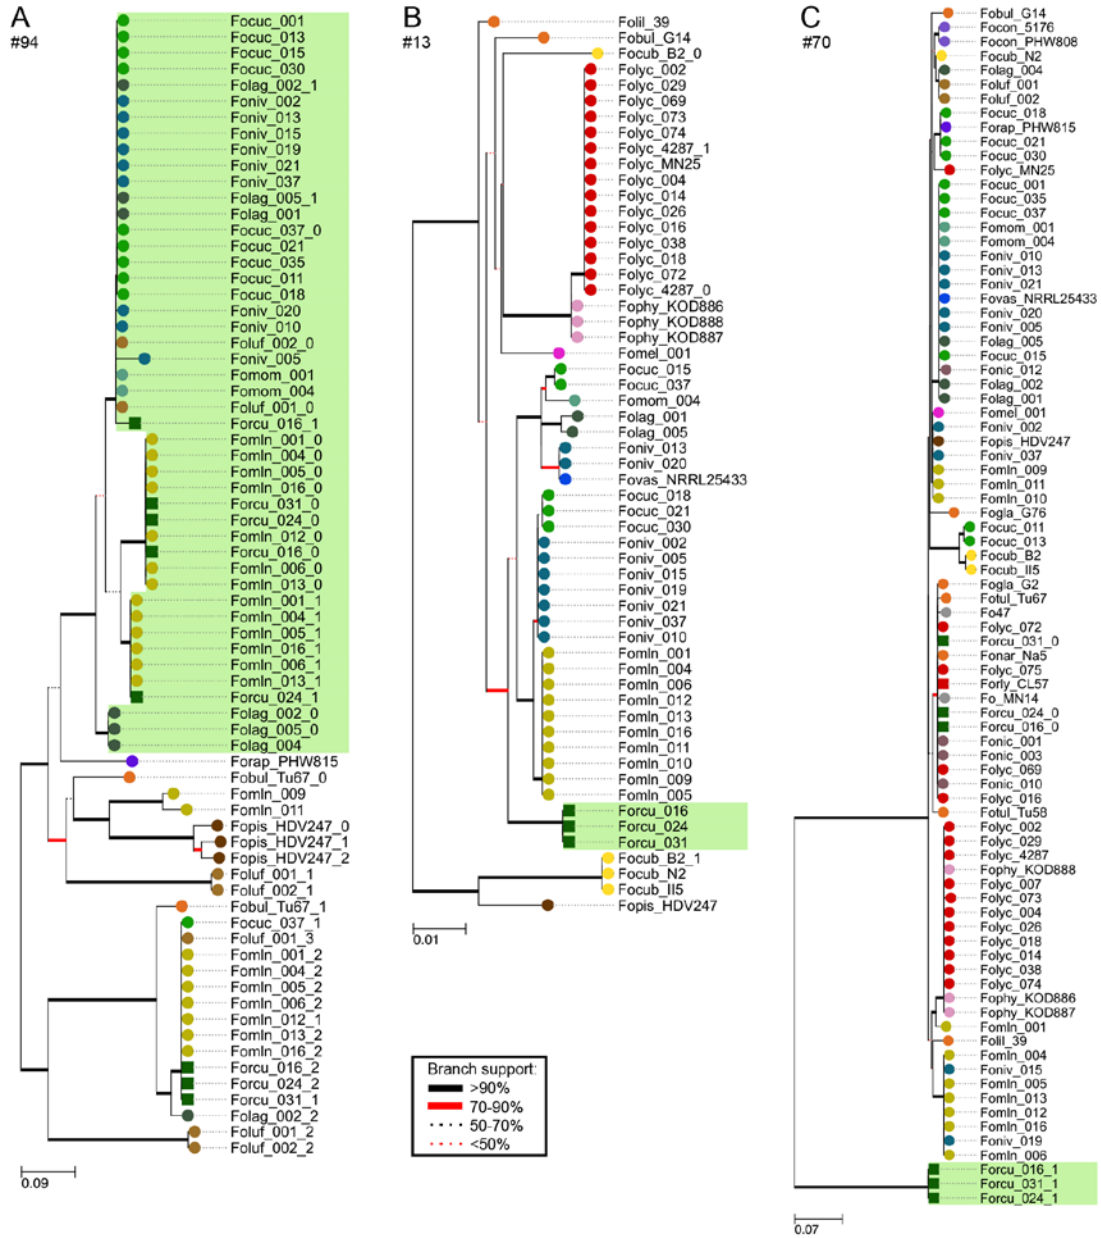

(Figure is continued on next page)

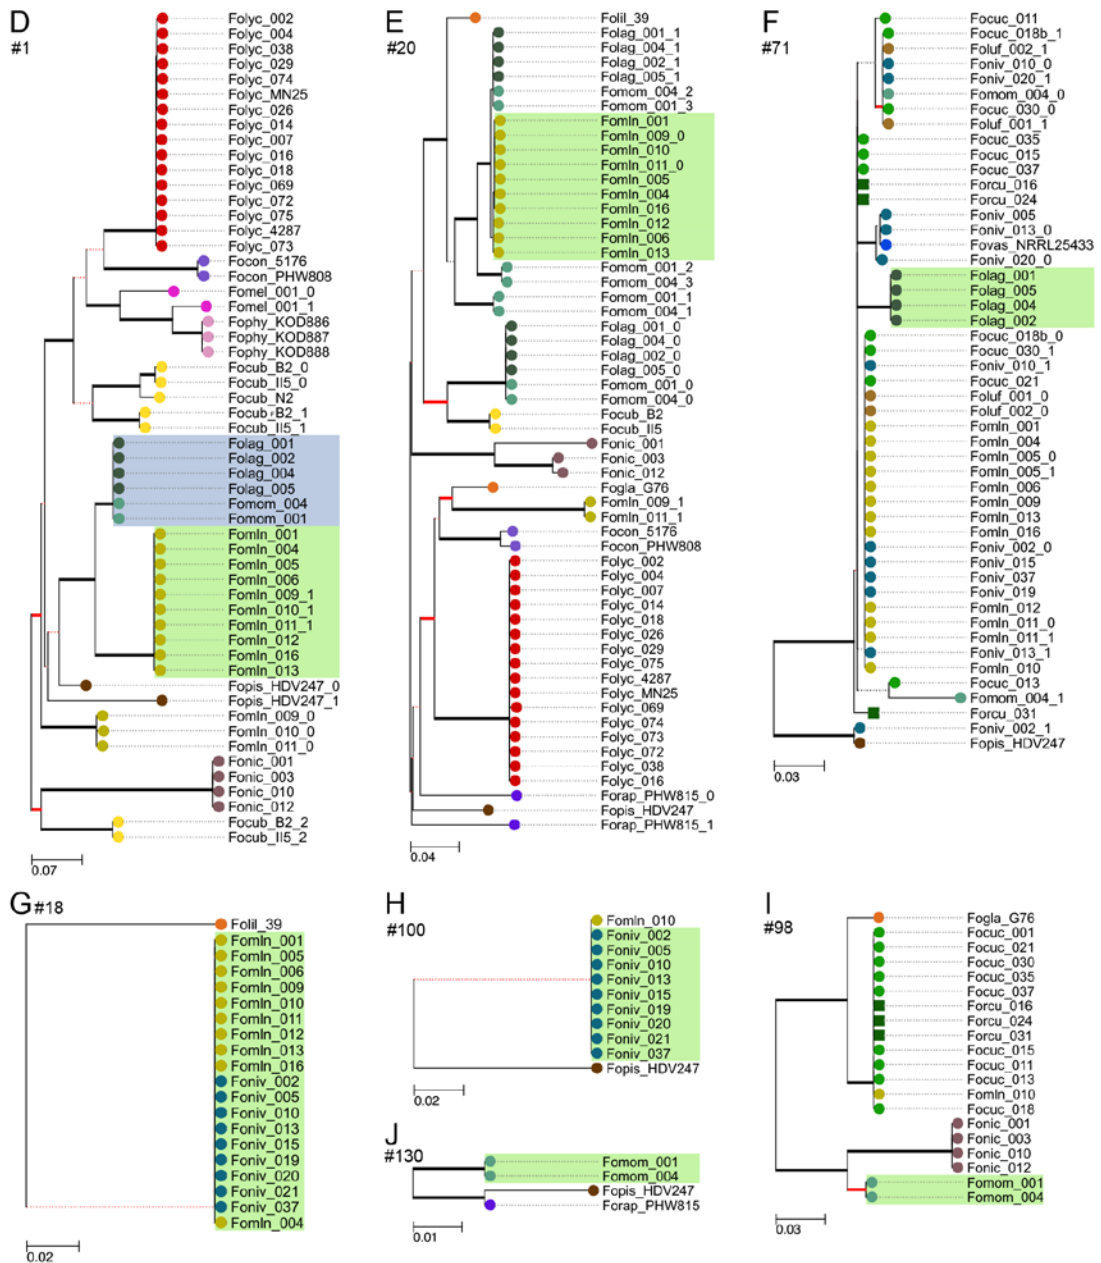

**Supplementary data S2: Phylogenetic tree of genes selected as marker genes for cucurbit infecting *formae speciales*.**

Separation of a clade that includes all strains belonging to a *forma specialis* indicates sequence similarity within and sequence dissimilarity between *formae speciales*. Coloured highlights in the tree reflect the target f. sp. of the marker.

**Supplementary data S3: Average disease index found for the bio-assays performed on strains that were suspected to belong to a different *forma specialis* than reported.**

Values given are the average disease indices (0-4) that were given to 5-8 individual plants, 2 weeks post inoculation. N.t. = not tested.

| Isolate  | Reported f. sp.        | <i>Citrullus</i>                     |                                 |                                    | Conclusion                 |
|----------|------------------------|--------------------------------------|---------------------------------|------------------------------------|----------------------------|
|          |                        | <i>Cucumis sativus</i><br>cv Paraiso | <i>Cucumis melo</i><br>cv Cha-T | <i>lanatus</i> cv<br>Black Diamond |                            |
| 14150    | <i>cucurbitacearum</i> | 3.2                                  | 4                               | n.t.                               | <i>radicis-cucumerinum</i> |
| Focuc014 | <i>cucumerinum</i>     | 2.63                                 | 3.88                            | n.t.                               | <i>radicis-cucumerinum</i> |
| Focuc022 | <i>cucumerinum</i>     | 0                                    | n.t.                            | n.t.                               | <i>non-pathogenic</i>      |
| Focuc028 | <i>cucumerinum</i>     | 0                                    | n.t.                            | n.t.                               | <i>non-pathogenic</i>      |
| Focuc039 | <i>cucumerinum</i>     | 0                                    | 0                               | n.t.                               | <i>non-pathogenic</i>      |
| Focuc040 | <i>cucumerinum</i>     | 3.2                                  | 4                               | 4                                  | <i>radicis-cucumerinum</i> |
| Fomln002 | <i>melonis</i>         | n.t.                                 | 0.25                            | n.t.                               | <i>non-pathogenic</i>      |
| Fomln017 | <i>melonis</i>         | 0                                    | 4                               | 0                                  | <i>melonis</i>             |
| Fomln021 | <i>melonis</i>         | n.t.                                 | 4                               | n.t.                               | <i>melonis</i>             |
| Fomln023 | <i>melonis</i>         | n.t.                                 | 3.63                            | 3                                  | <i>melonis/niveum</i>      |
| Fomln024 | <i>melonis</i>         | n.t.                                 | 4                               | n.t.                               | <i>melonis</i>             |
| Fomln025 | <i>melonis</i>         | n.t.                                 | 3.75                            | n.t.                               | <i>melonis</i>             |
| Fomln026 | <i>melonis</i>         | n.t.                                 | 4                               | n.t.                               | <i>melonis</i>             |
| Foniv034 | <i>niveum</i>          | n.t.                                 | n.t.                            | 0                                  | <i>non-pathogenic</i>      |
| Foniv035 | <i>niveum</i>          | n.t.                                 | n.t.                            | 0                                  | <i>non-pathogenic</i>      |
| Foniv038 | <i>niveum</i>          | n.t.                                 | n.t.                            | 0                                  | <i>non-pathogenic</i>      |

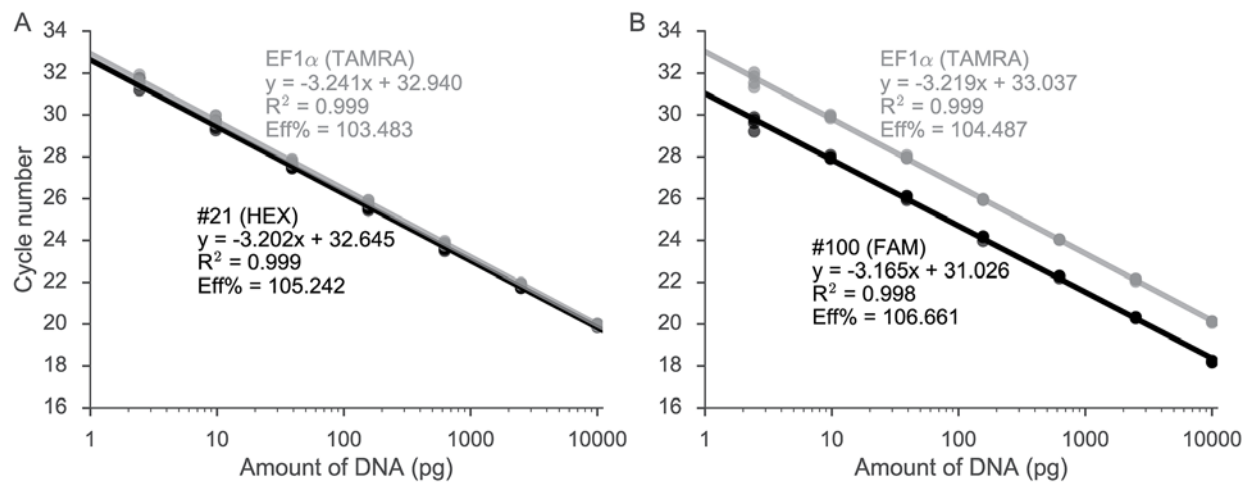

**Supplementary data S4: Taqman assays on effector candidates can detect genomic DNA quantities as low as 2.5 pg.**

Standard curves for DNA quantification were generated using a 4-fold serial dilution of *Fo f. sp. niveum* genomic DNA with (A) marker #21, (B) marker #100. Both standard curves were generated in duplex with the control gene, *EF1a*. Four technical replicates were used per dilution.
